# Supplementary material for: A radical addition/cyclization of diverse ethers to 2-isocyanobiaryls under mildly basic aqueous conditions
Source: Royal Society of Chemistry journal article supplement (doi:10.1039/c6ob02103d), 2016-01-01

## Electronic Supplementary Information for:

### A Radical Addition/Cyclization of Diverse Ethers to 2-Isocyanobiaryls under Mildly Basic Aqueous Conditions

Cintia Anton-Torrecillas, Diego Felipe-Blanco, Jose C. Gonzalez-Gomez\*

Departamento de Química Orgánica, Facultad de Ciencias and Instituto de Síntesis Orgánica (ISO), Universidad de Alicante, Apdo. 99, 03080 Alicante, Spain

|                                                                                                                                                                 |          |
|-----------------------------------------------------------------------------------------------------------------------------------------------------------------|----------|
| Free Radical Capture Experiments.....                                                                                                                           | <b>2</b> |
| Experiments to Identify the Source of Hydrogen in <b>4a</b> .....                                                                                               | <b>4</b> |
| Competition Experiments of <b>1a</b> with an Equimolar Mixture of <b>THF/D<sub>8</sub>-THF</b> to Examine the Intermolecular Kinetic Isotopic Effect (KIE)..... | <b>5</b> |
| Competition Experiments of <b>THF</b> with an Equimolar Mixture of <b>1a/1b</b> or <b>1a/1i</b> .....                                                           | <b>6</b> |
| Detection of regioisomers upon formation of <b>3ac</b> by GC-MS                                                                                                 | <b>7</b> |
| NMR spectra of Compounds <b>3</b> and Compound <b>4</b> .....                                                                                                   | <b>9</b> |

## Free Radical Capture Experiments

### ✓ Standard procedure

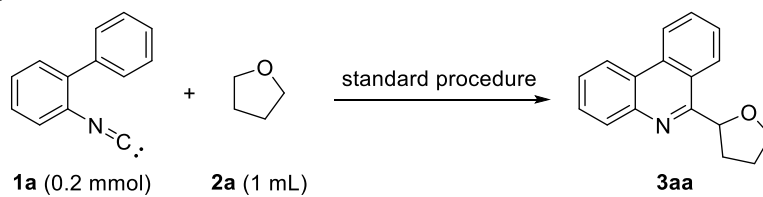

### GC-MS of compound 3aa

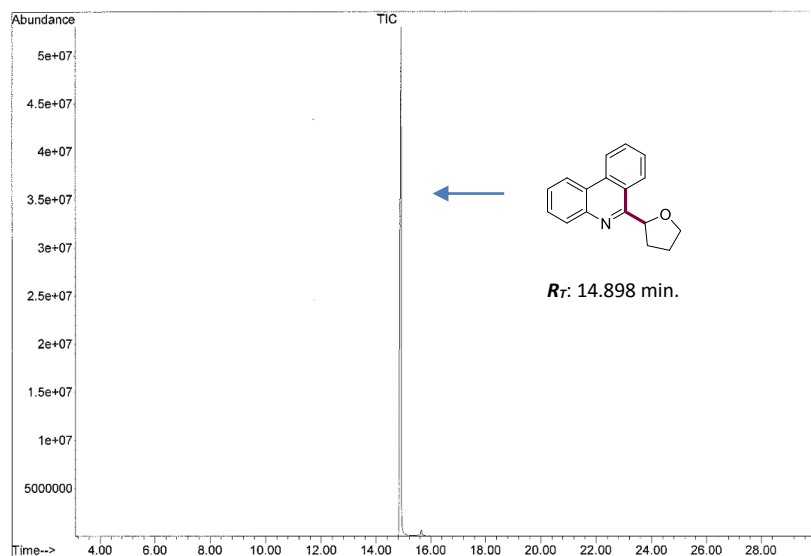

### ✓ Standard procedure + TEMPO (3 equiv.)

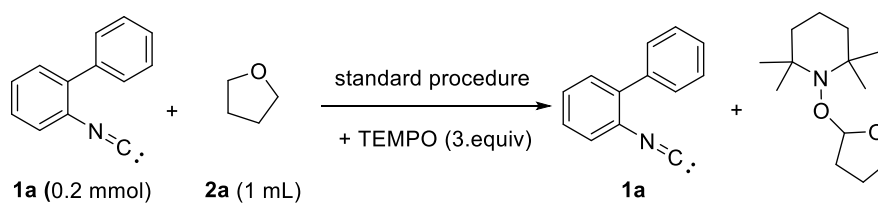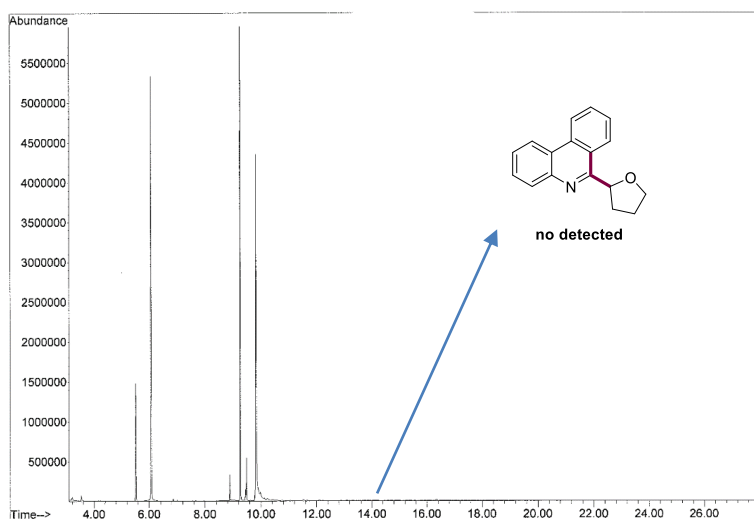

✓ ESI-MASS (positive mode).

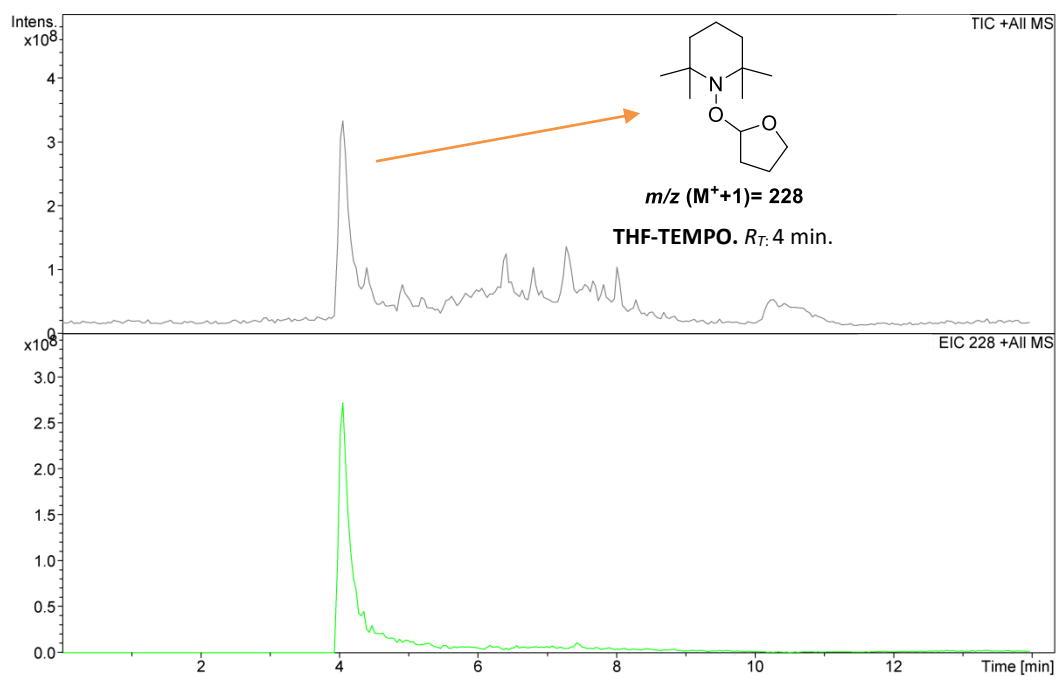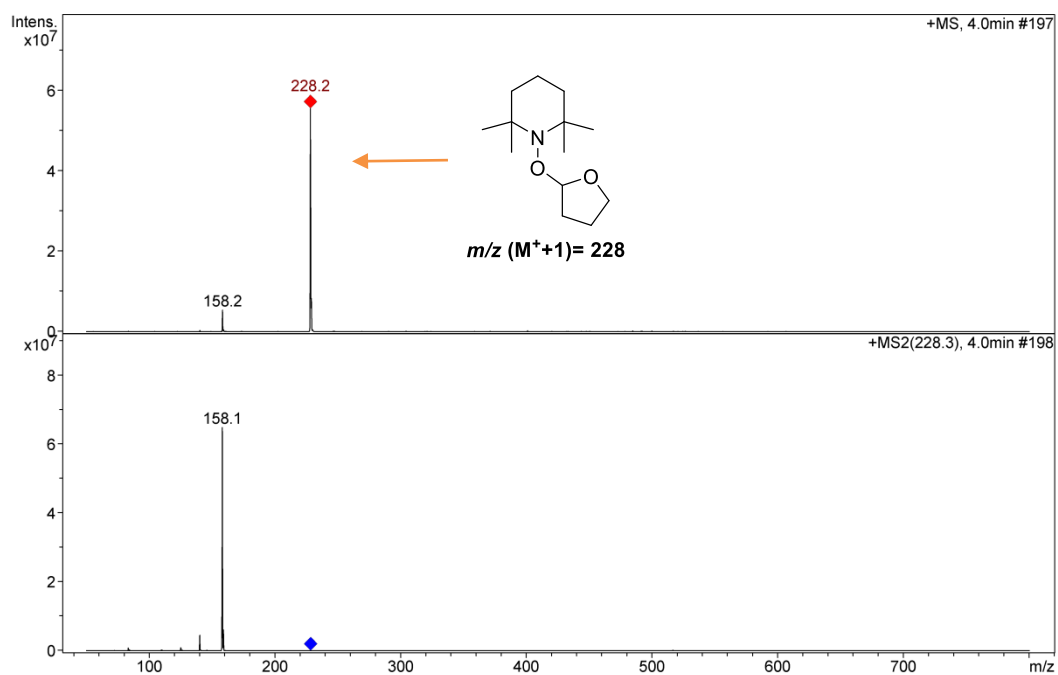

## Experiments to Identify the Source of Hydrogen in 4a

Into a pressure tube were added  $\text{K}_2\text{CO}_3$  (54 mg, 0.30 mmol) and  $\text{D}_2\text{O}$  (0.5 mL). Then, were sequentially added 2-isocyanobiaryl **1a** (54 mg, 0.30 mmol), THF- $\text{D}_8$  (1.5 mL) and *tert*-butyl peroxibenzoate (TBPB) (128  $\mu\text{L}$ , 0.70 mmol). The reaction mixture was stirred under Ar atmosphere for 14 h at 110  $^\circ\text{C}$ . After this time, a saturated solution of  $\text{NaHCO}_3$  (5 mL) and EtOAc (10 mL) were added and the reaction mixture was extracted with EtOAc (3 x 15 mL). The organic layers were combined and washed with brine (5 mL), dried over  $\text{MgSO}_4$ , and concentrated under reduced pressure. The residue was purified by flash chromatography (Hex/EtOAc, 95:5 to 93:7) to afford product **D<sub>7</sub>-3aa** as a white solid (45 mg, 59 %) and compound **4a** as a yellow solid (11 mg, 21 %).

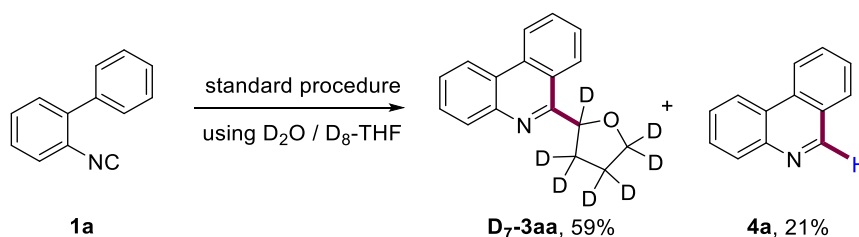

Analyzing the GC-MS of the crude reaction mixture, it was possible to confirm that compound **4a** was not deuterated.

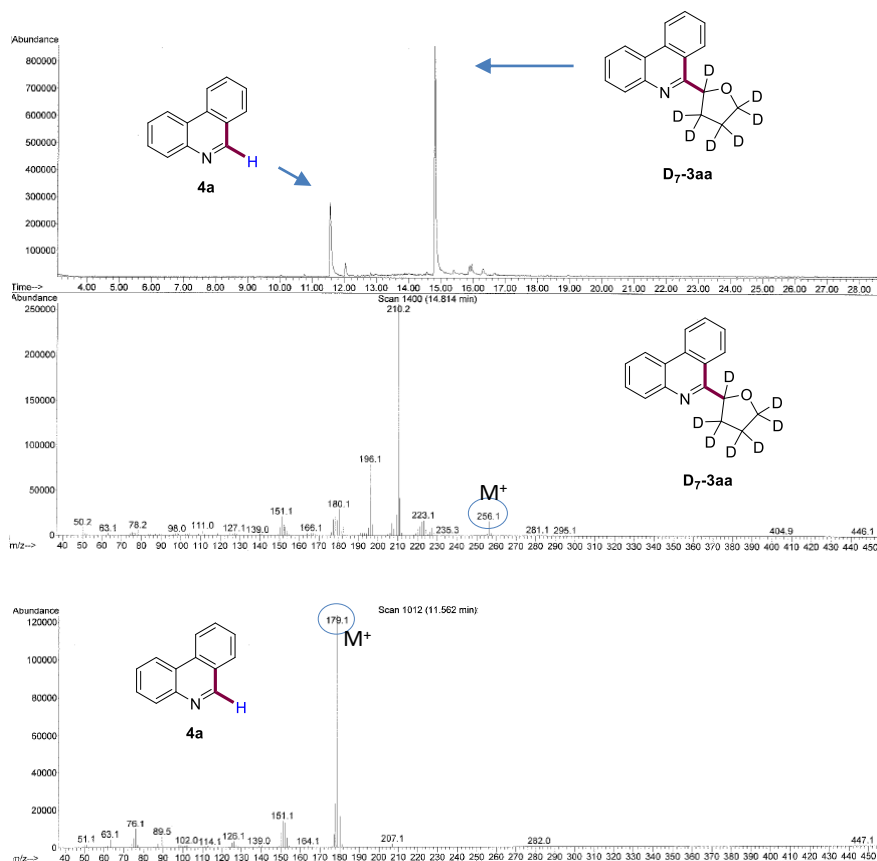

## Competition Experiments of **1a** with an Equimolar Mixture of THF/D<sub>8</sub>-THF to Examine the Intermolecular Kinetic Isotopic Effect (KIE).

In a pressure tube, the mixture of **1a** (0.30 mmol), **THF/D<sub>8</sub>-THF** (1:1, 1.5 mL) was treated under standard conditions for 1.5 h. The reaction mixture was quenched with NaHCO<sub>3</sub> (5 mL) and was extracted with EtOAc (3 x 15 mL). The organic layers were combined and washed with brine (5 mL), dried over MgSO<sub>4</sub> and concentrated under reduce pressure. The residue was purified by flash column chromatography on silica gel (95:5 to 93:7, hexane/EtOAc) to separate the excess of **1a**, and the mixture of products **3aa/D<sub>7</sub>-3aa** was collected (combined yield: 19%). Using <sup>1</sup>H-NMR, it was found a 76:24 ratio of **3aa/D<sub>7</sub>-3aa**, as shown in **Figure S1**.

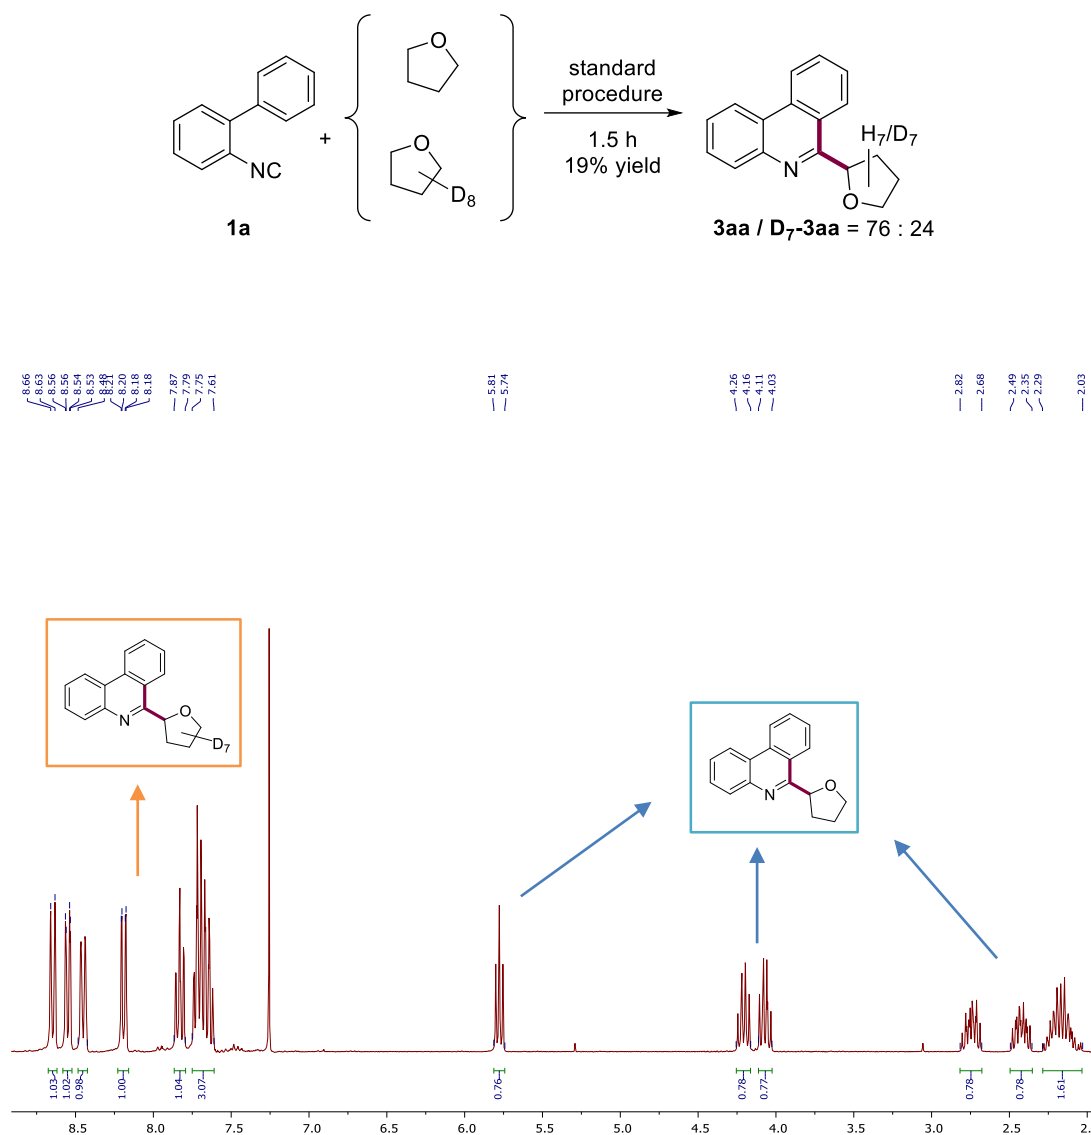

**Figure S1.** <sup>1</sup>H-NMR (300 MHz, CDCl<sub>3</sub>) of the mixture **3aa/D<sub>7</sub>-3aa** isolated as describe above.

### Competition Experiments of THF with an Equimolar Mixture of 1a/1b or 1a/1i

✓ Substrates **1a** and **1b**

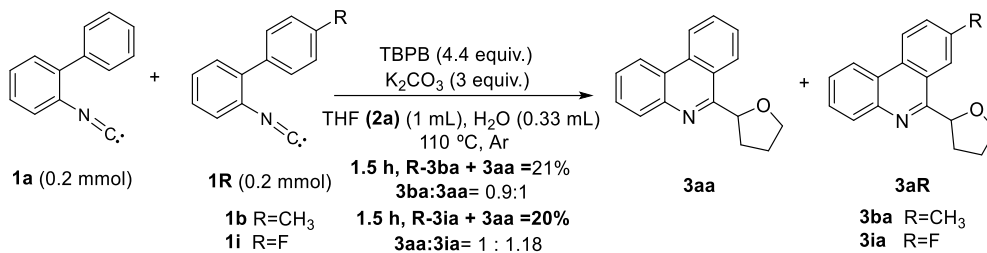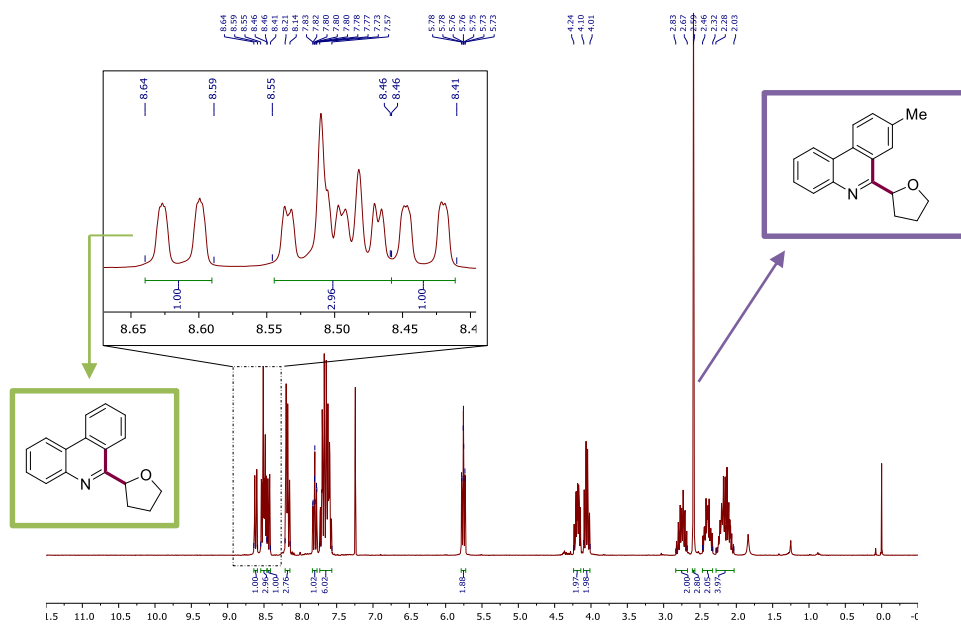

✓ Substrates **1a** and **1i**

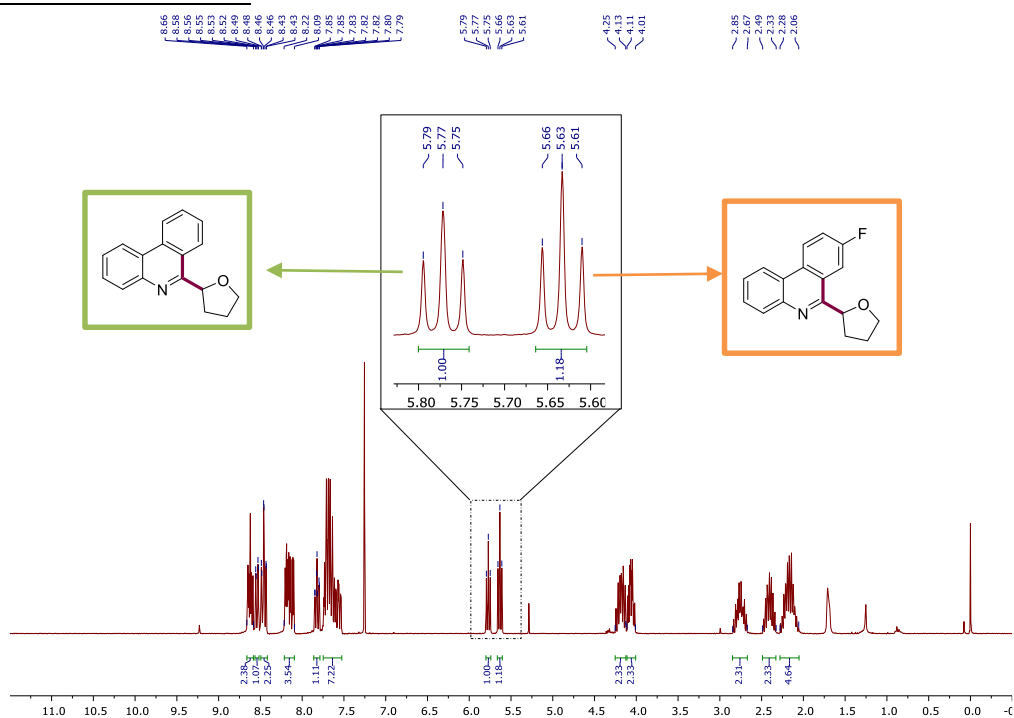

## Detection of regioisomers upon formation of 3ac by GC-MS

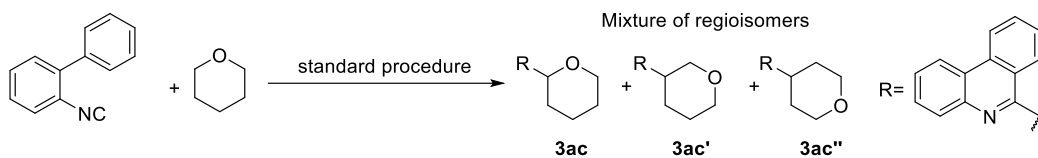

GC (MS) of crude reaction mixture:

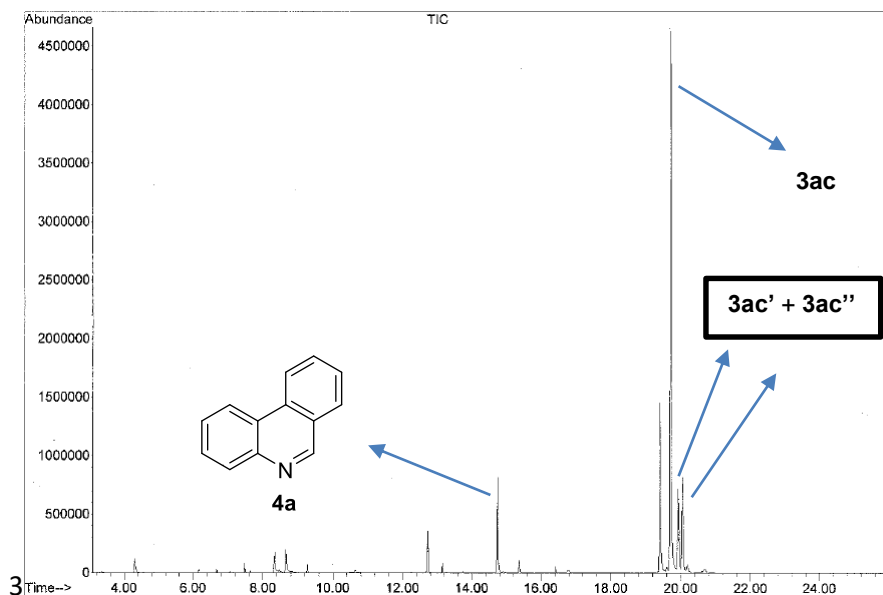

GC (MS) of 3ac after column purification:

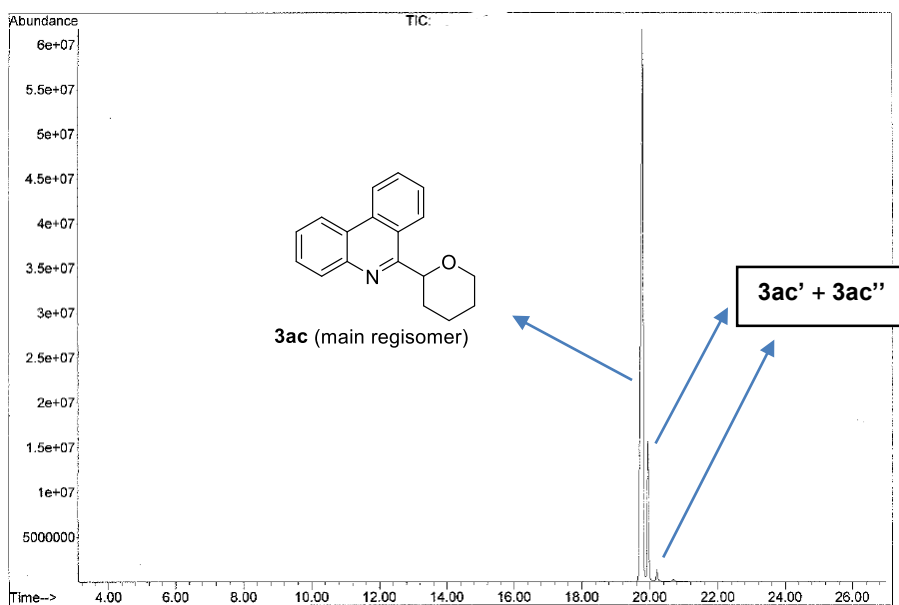

MS for selected GC peaks in the formation of **3ac** (**3ac** and regioisomers):

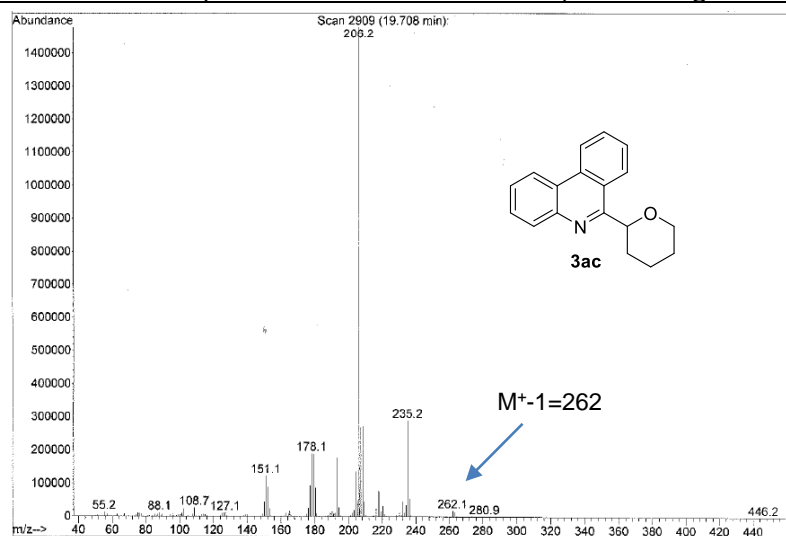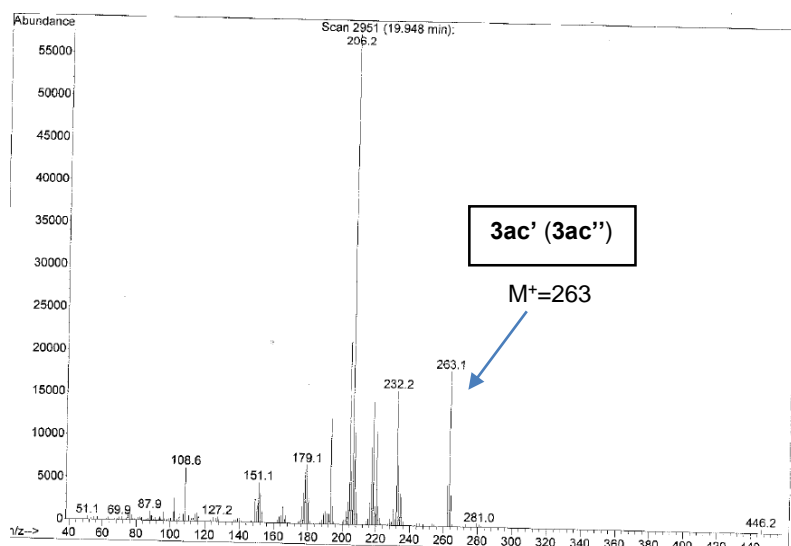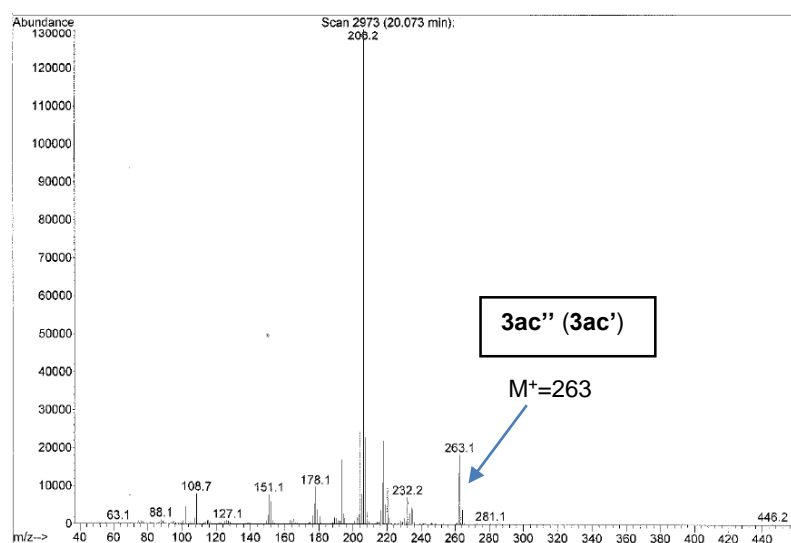



<sup>1</sup>H-NMR (300 MHz, CDCl<sub>3</sub>)

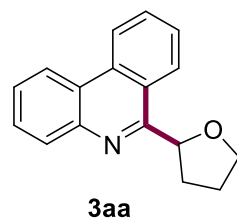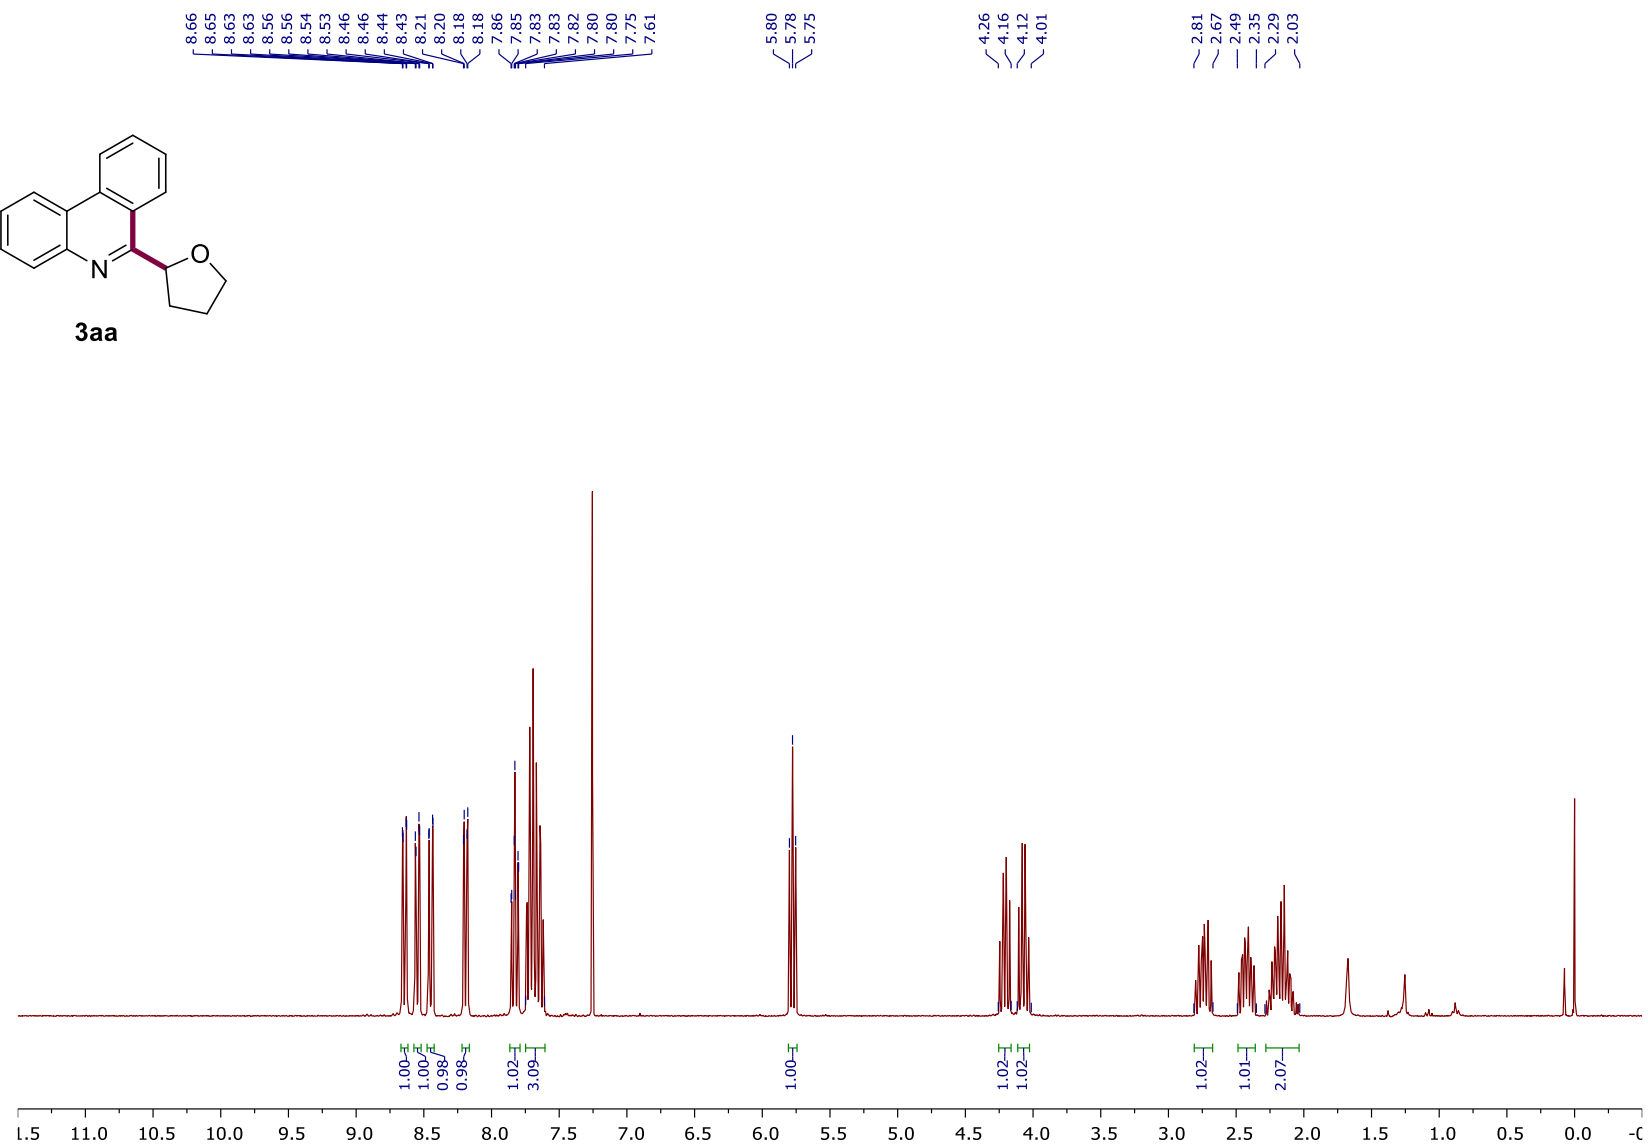

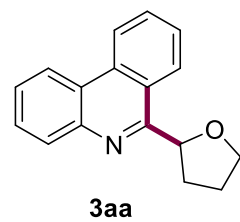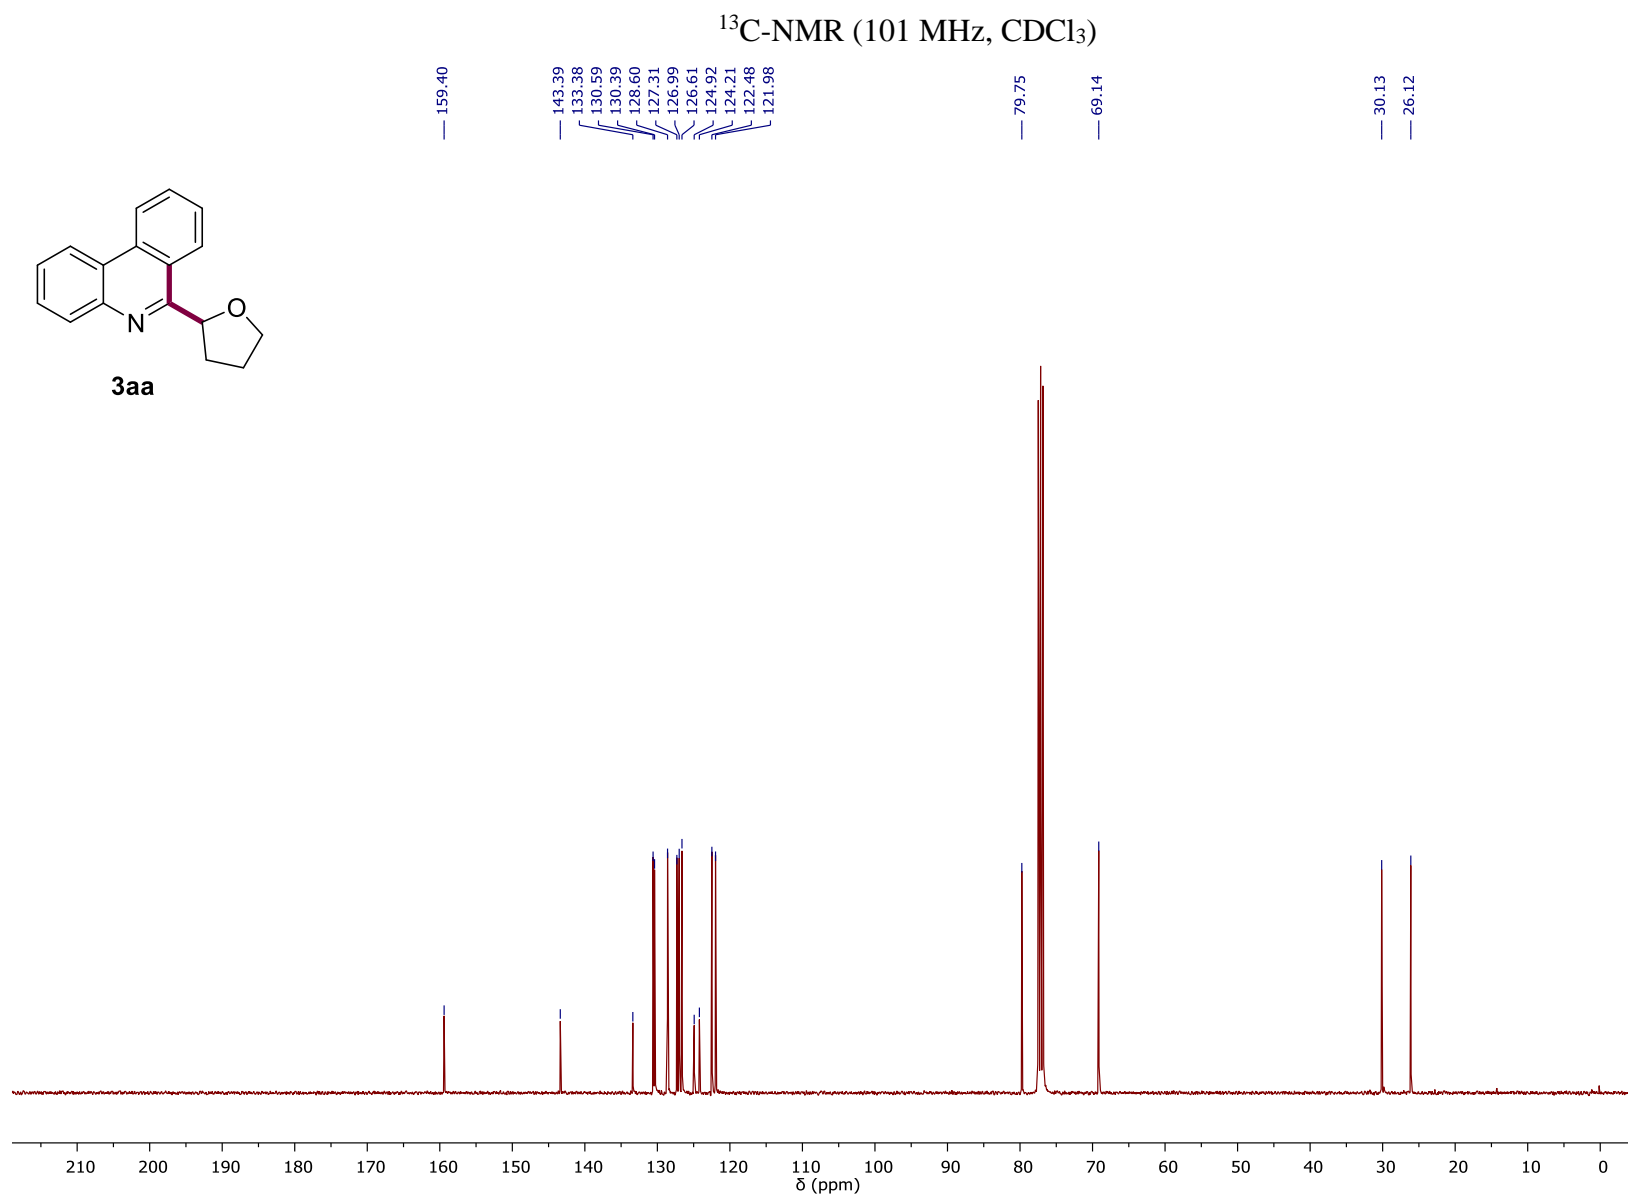

<sup>1</sup>H-NMR (400 MHz, CDCl<sub>3</sub>)

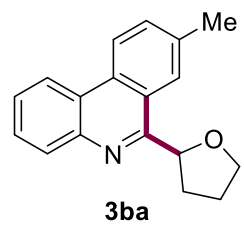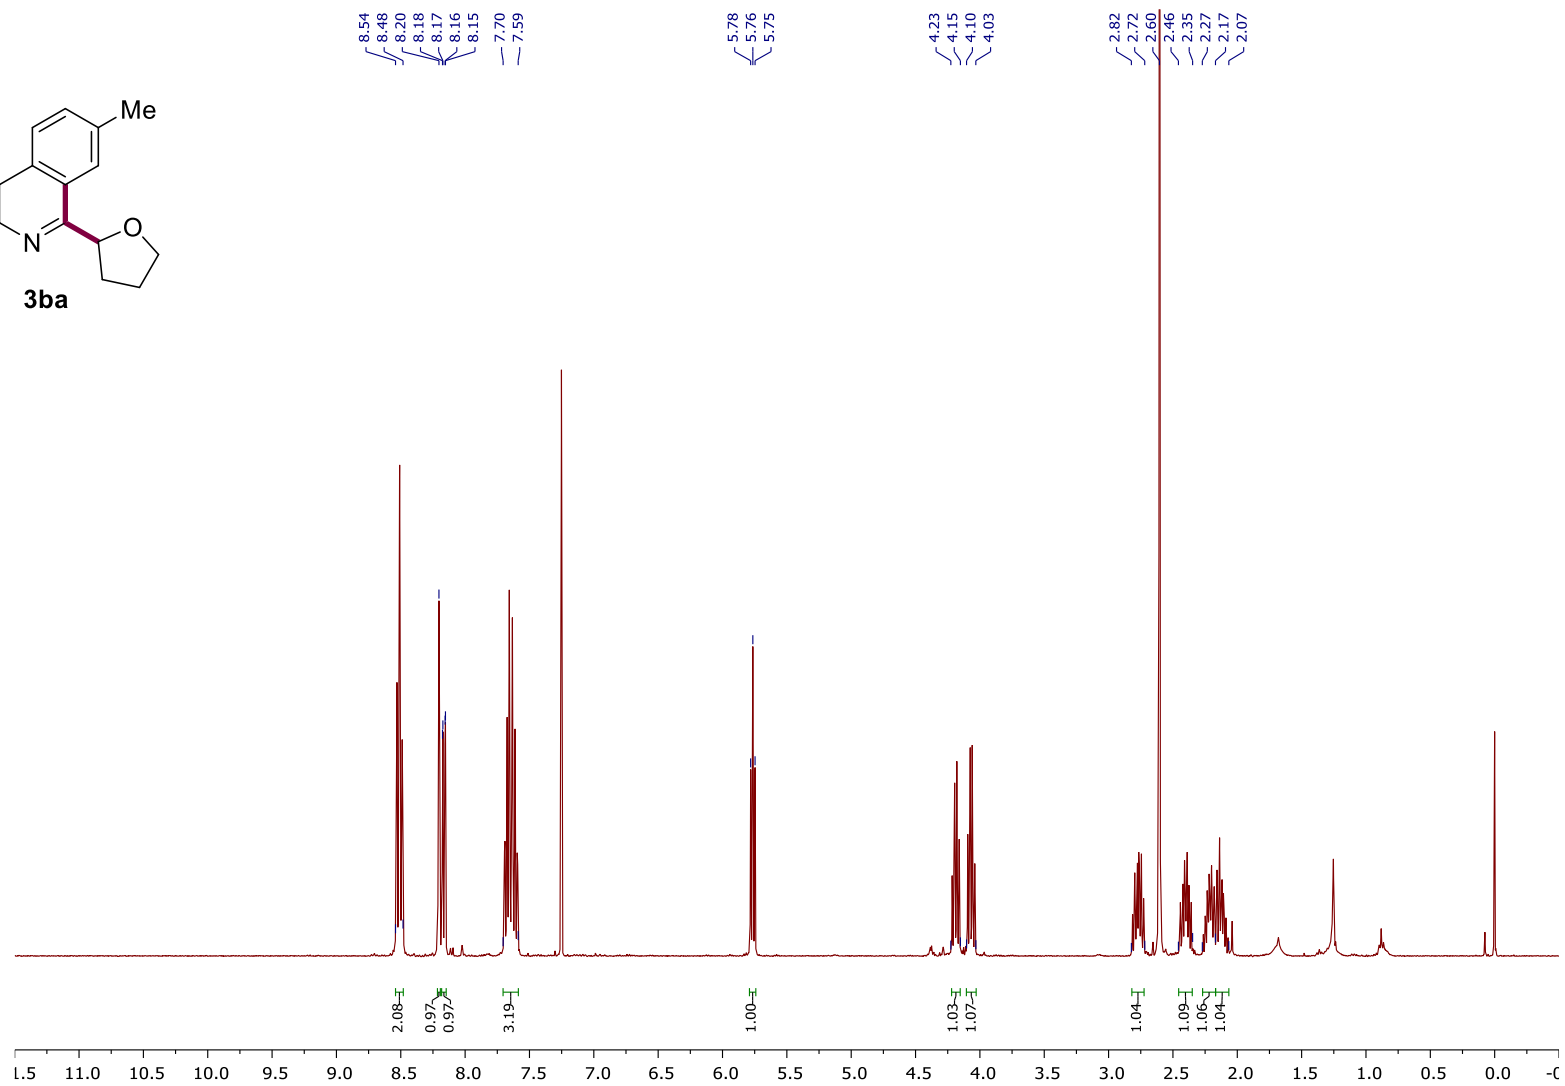

$^{13}\text{C}$ -NMR (101 MHz,  $\text{CDCl}_3$ )

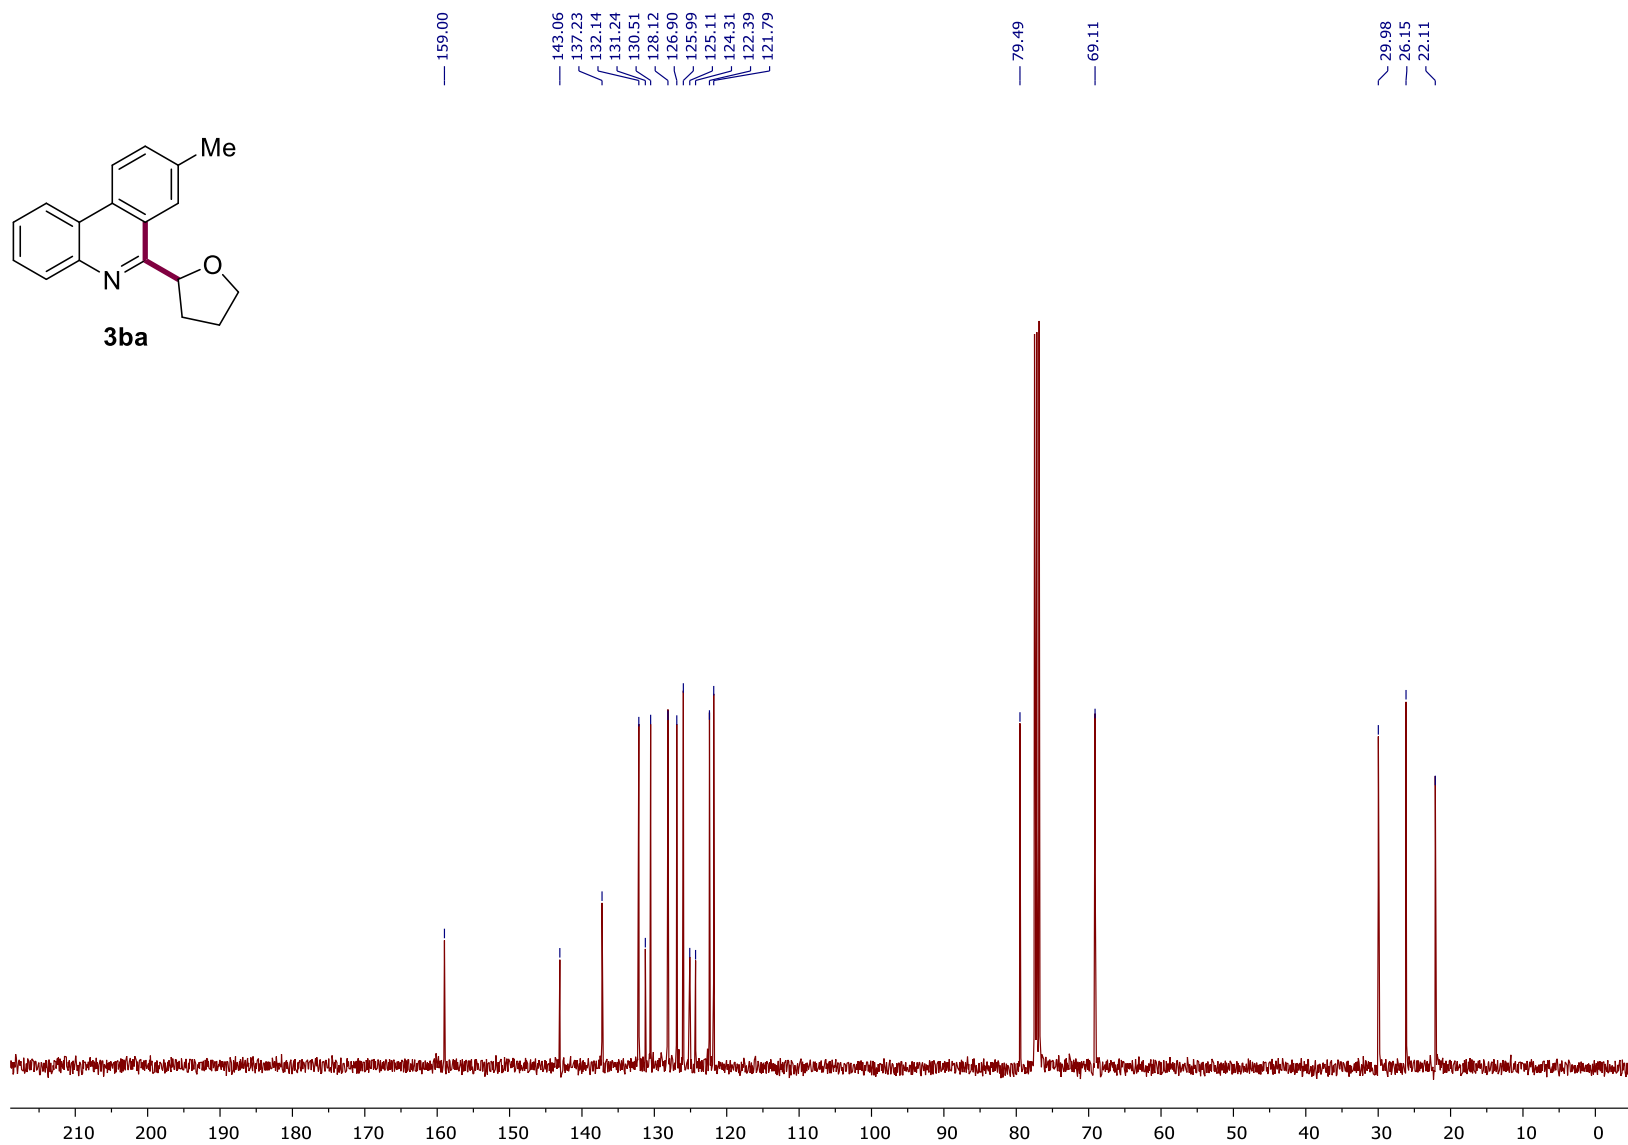

<sup>1</sup>H-NMR (400 MHz, CDCl<sub>3</sub>)

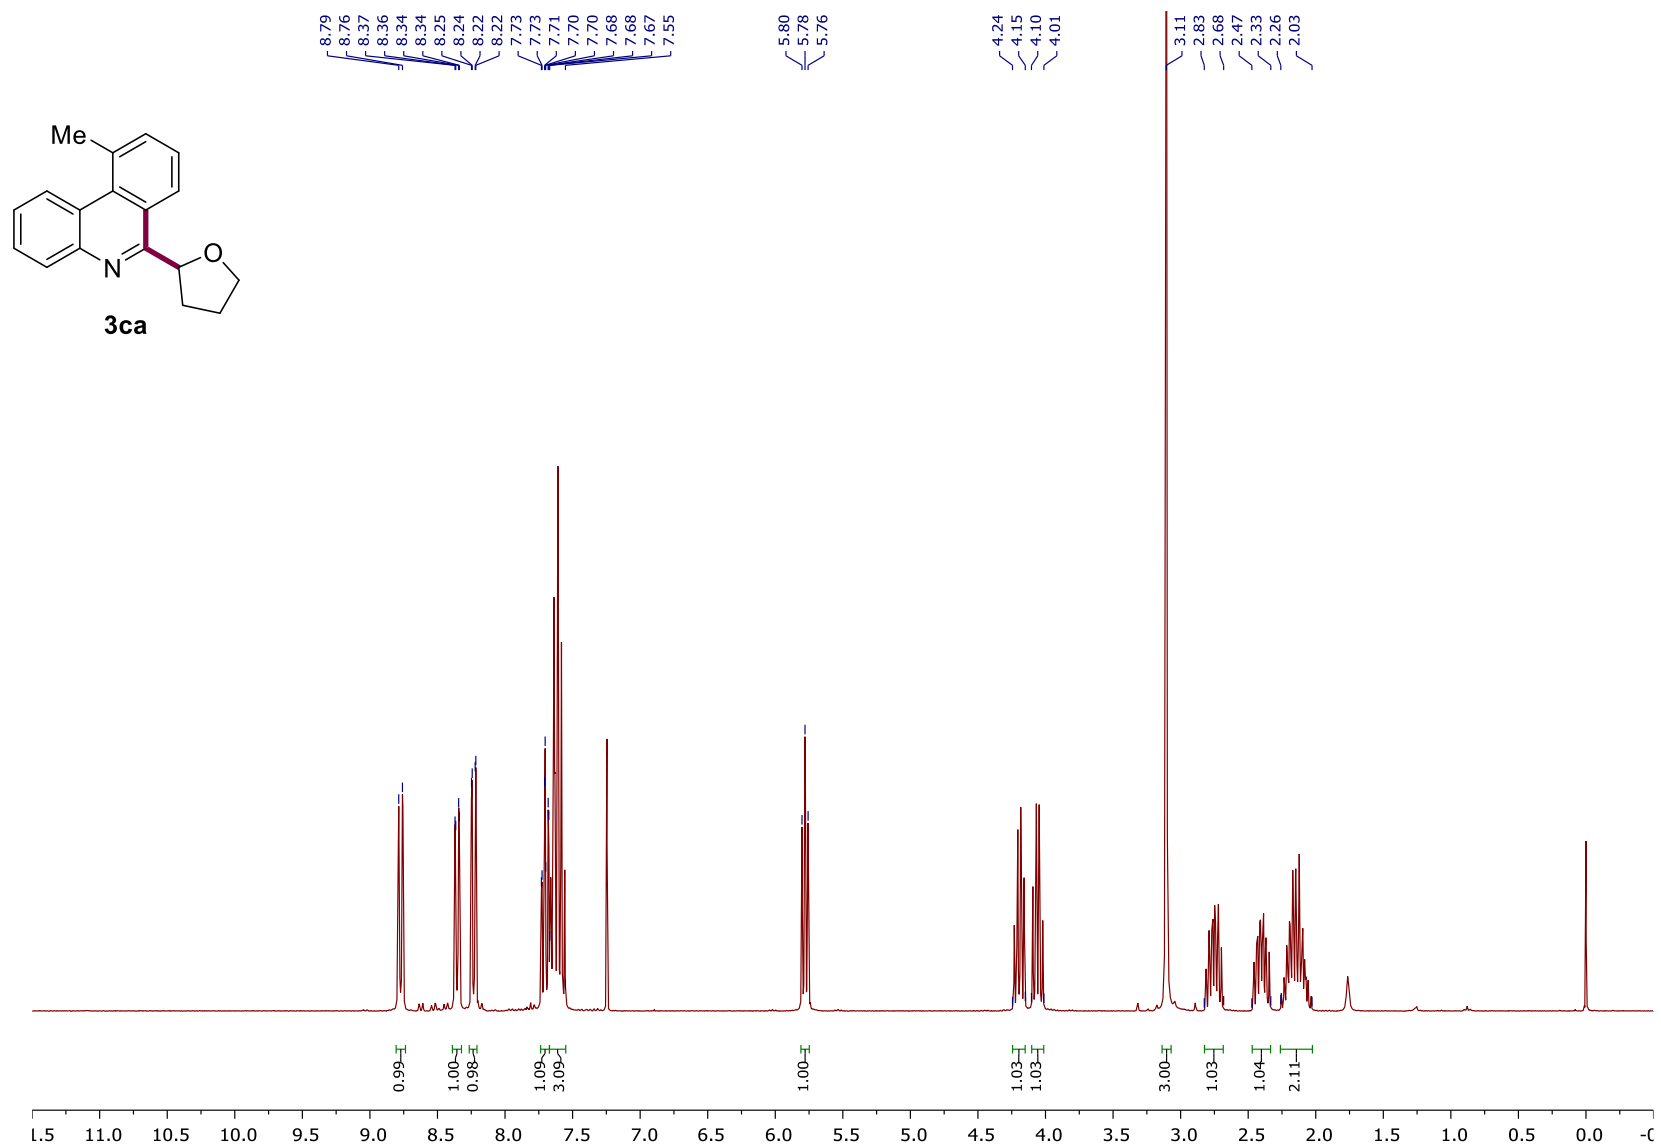

$^{13}\text{C}$ -NMR (101 MHz,  $\text{CDCl}_3$ )

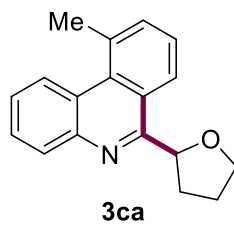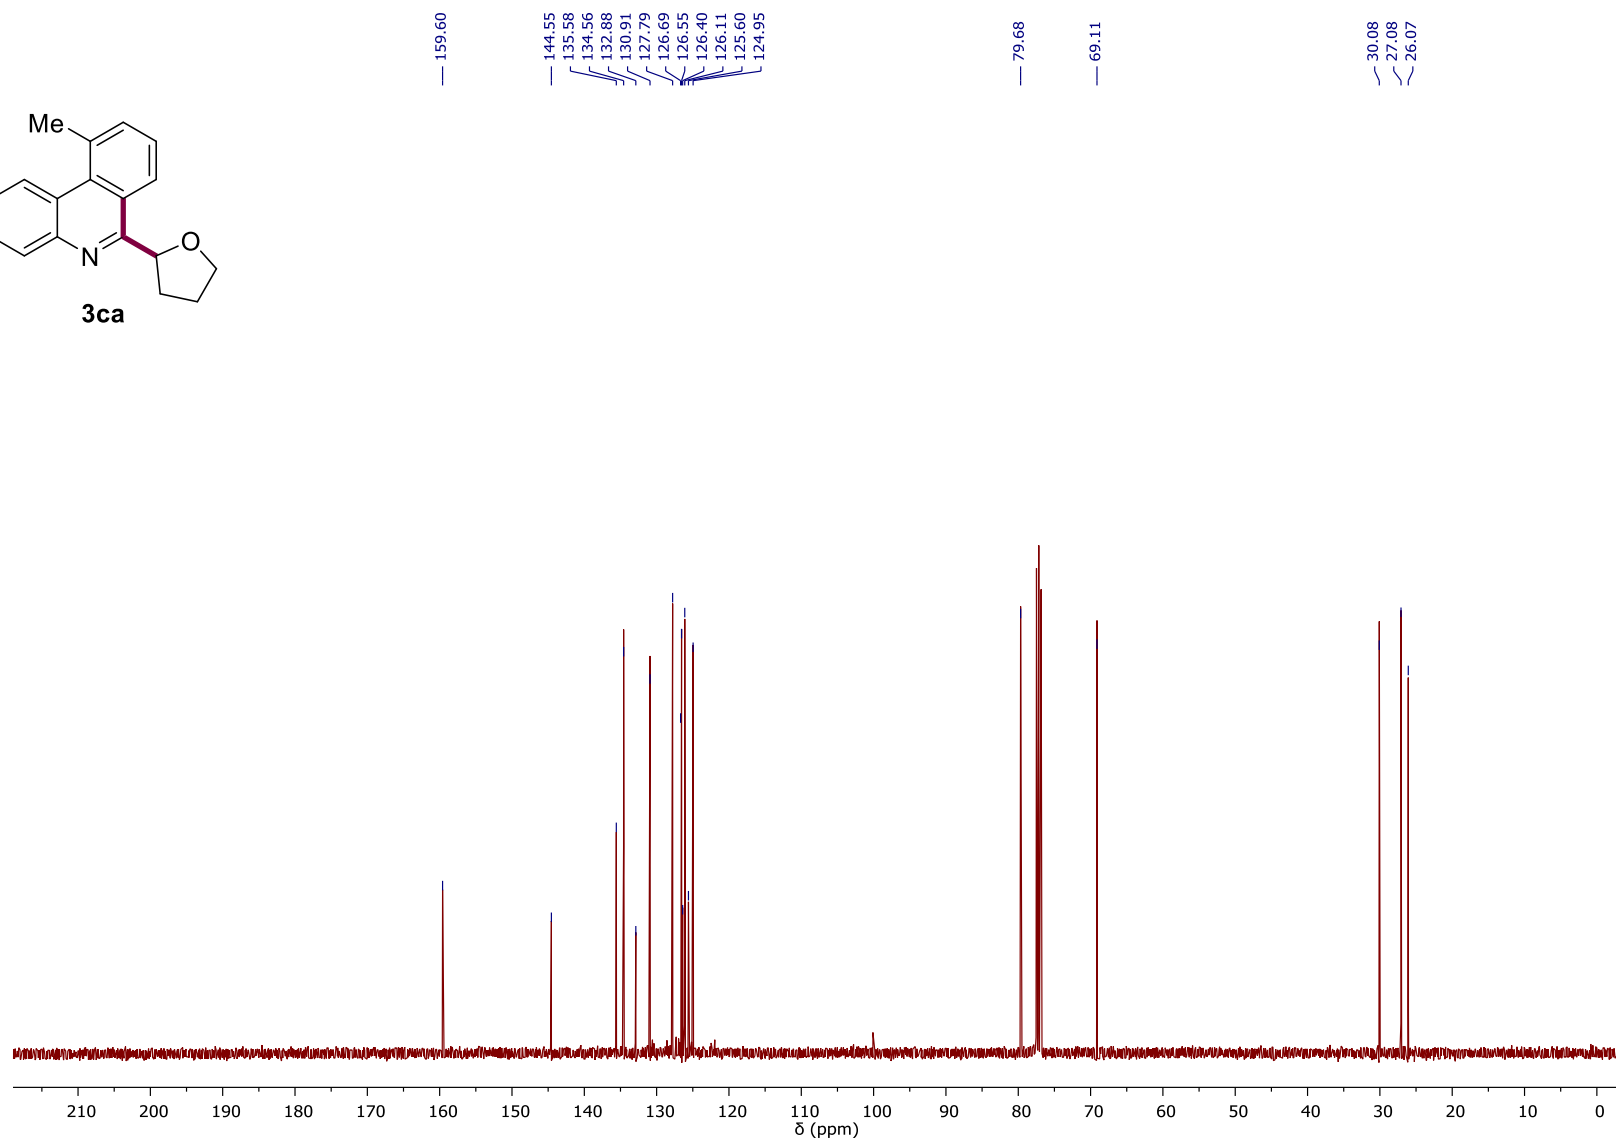

<sup>1</sup>H-NMR (300 MHz, CDCl<sub>3</sub>)

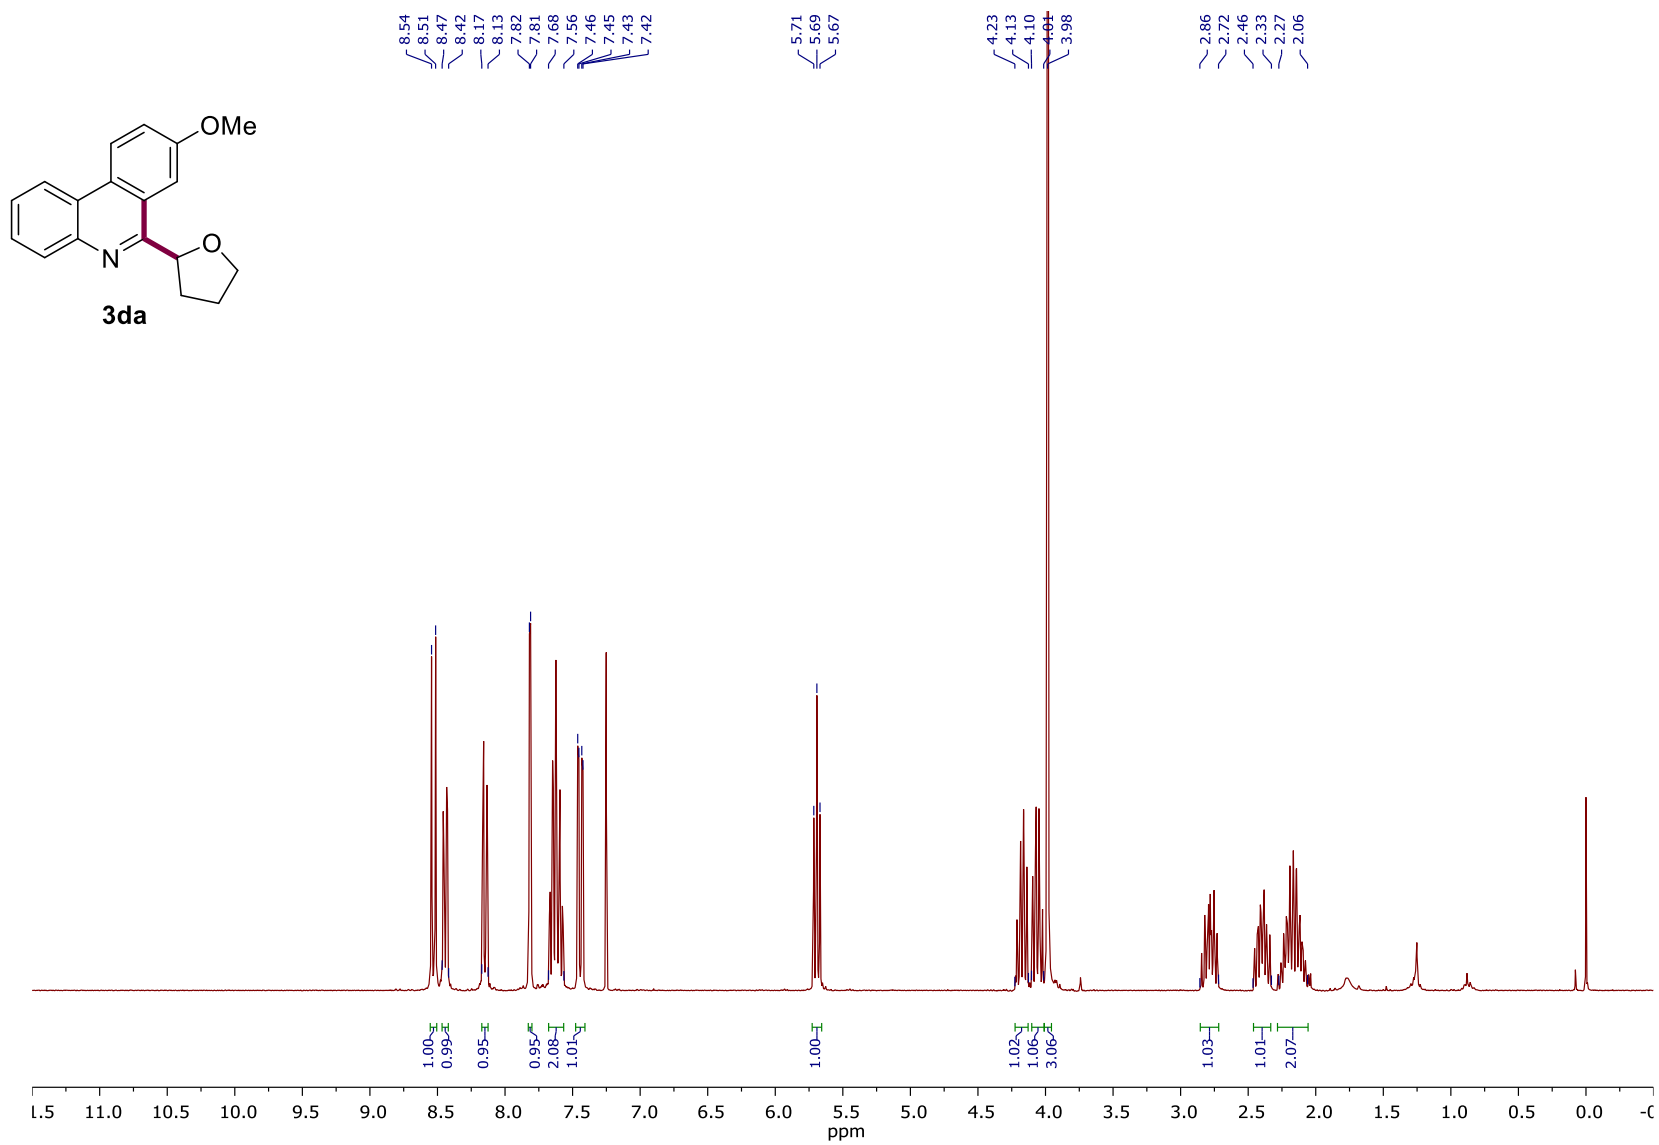

$^{13}\text{C}$ -NMR (101 MHz,  $\text{CDCl}_3$ )

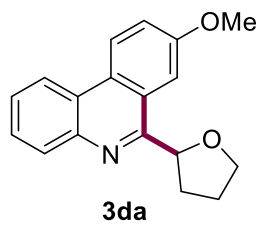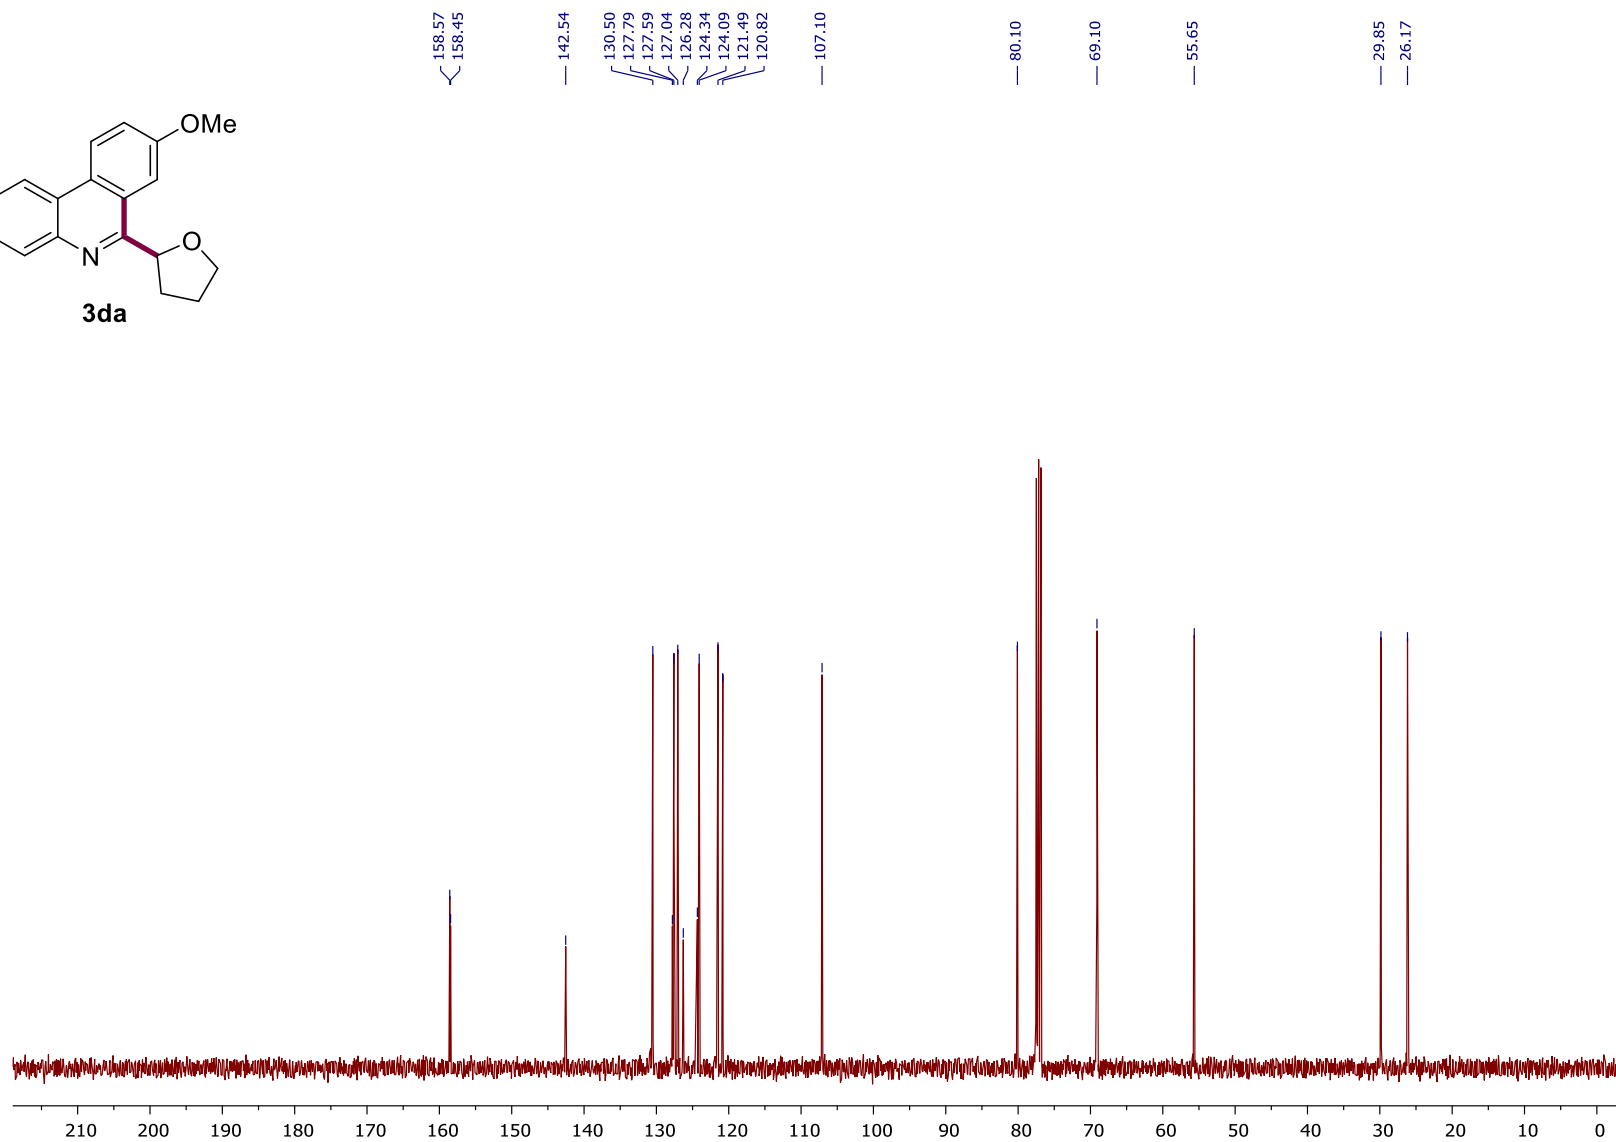



$^1\text{H}$ -NMR (400 MHz,  $\text{CDCl}_3$ )

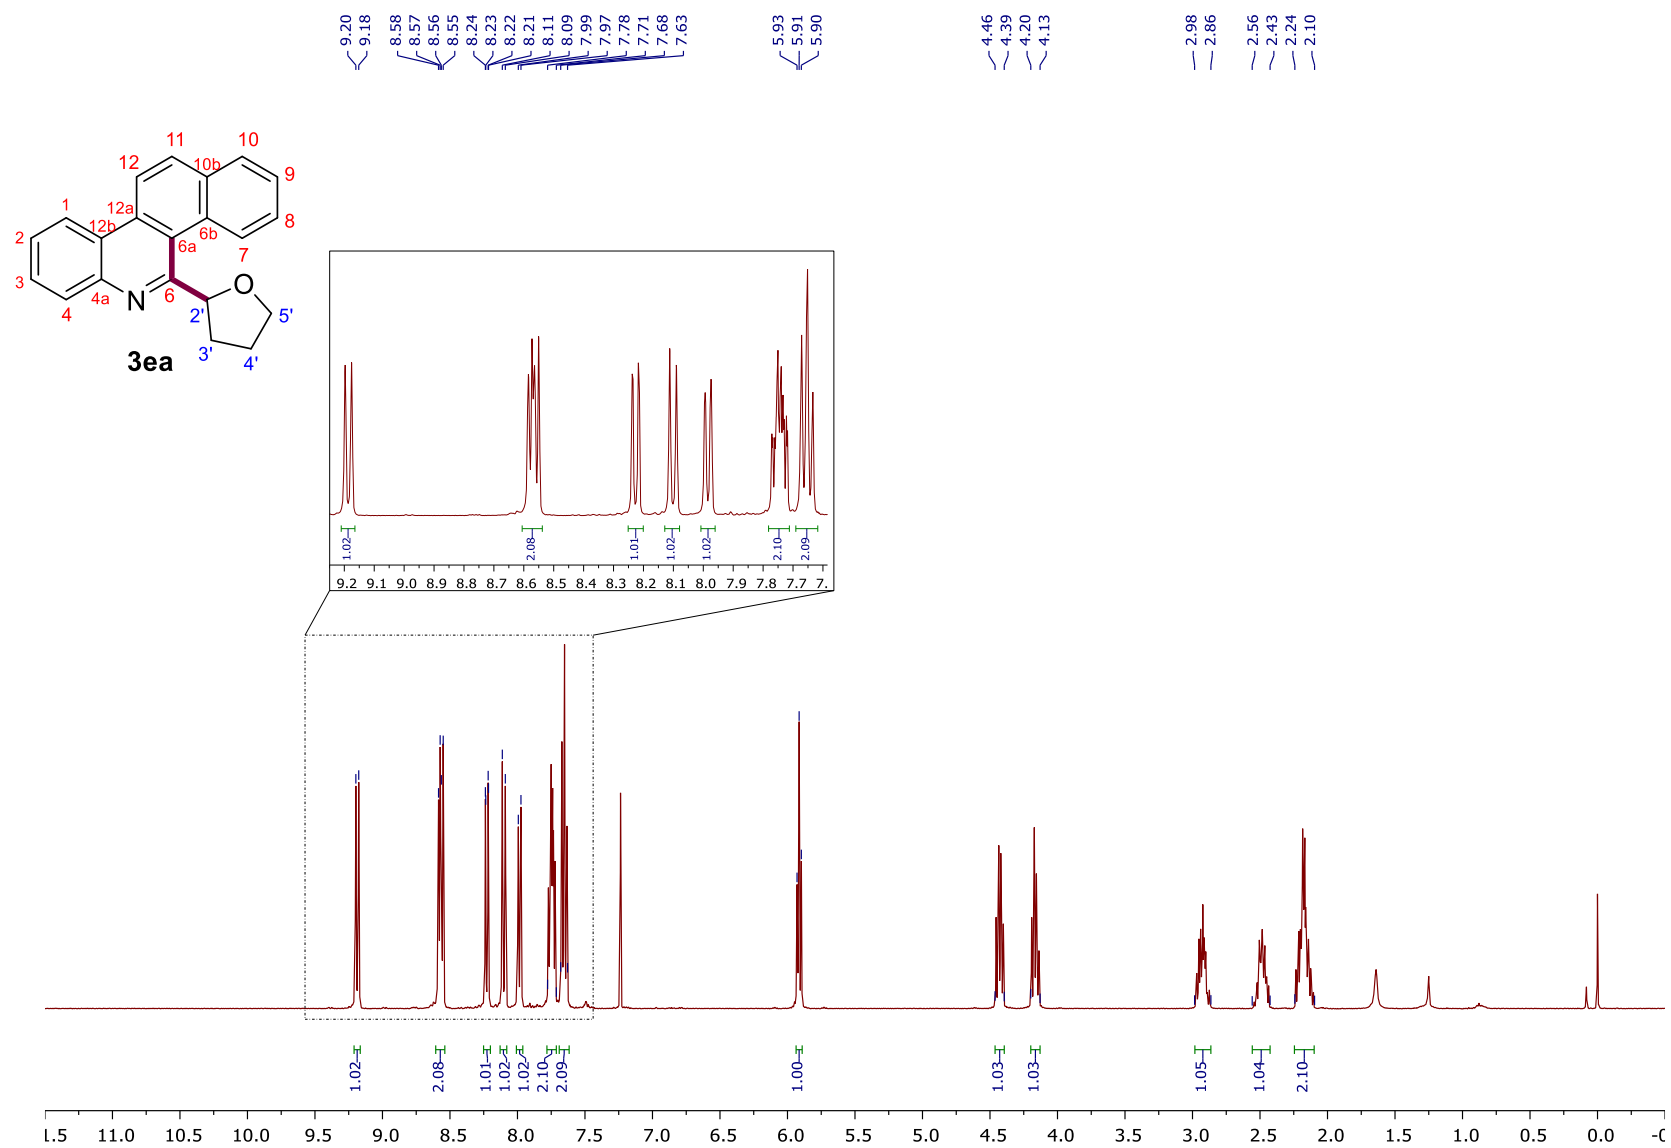

$^{13}\text{C}$ -NMR (101 MHz,  $\text{CDCl}_3$ )

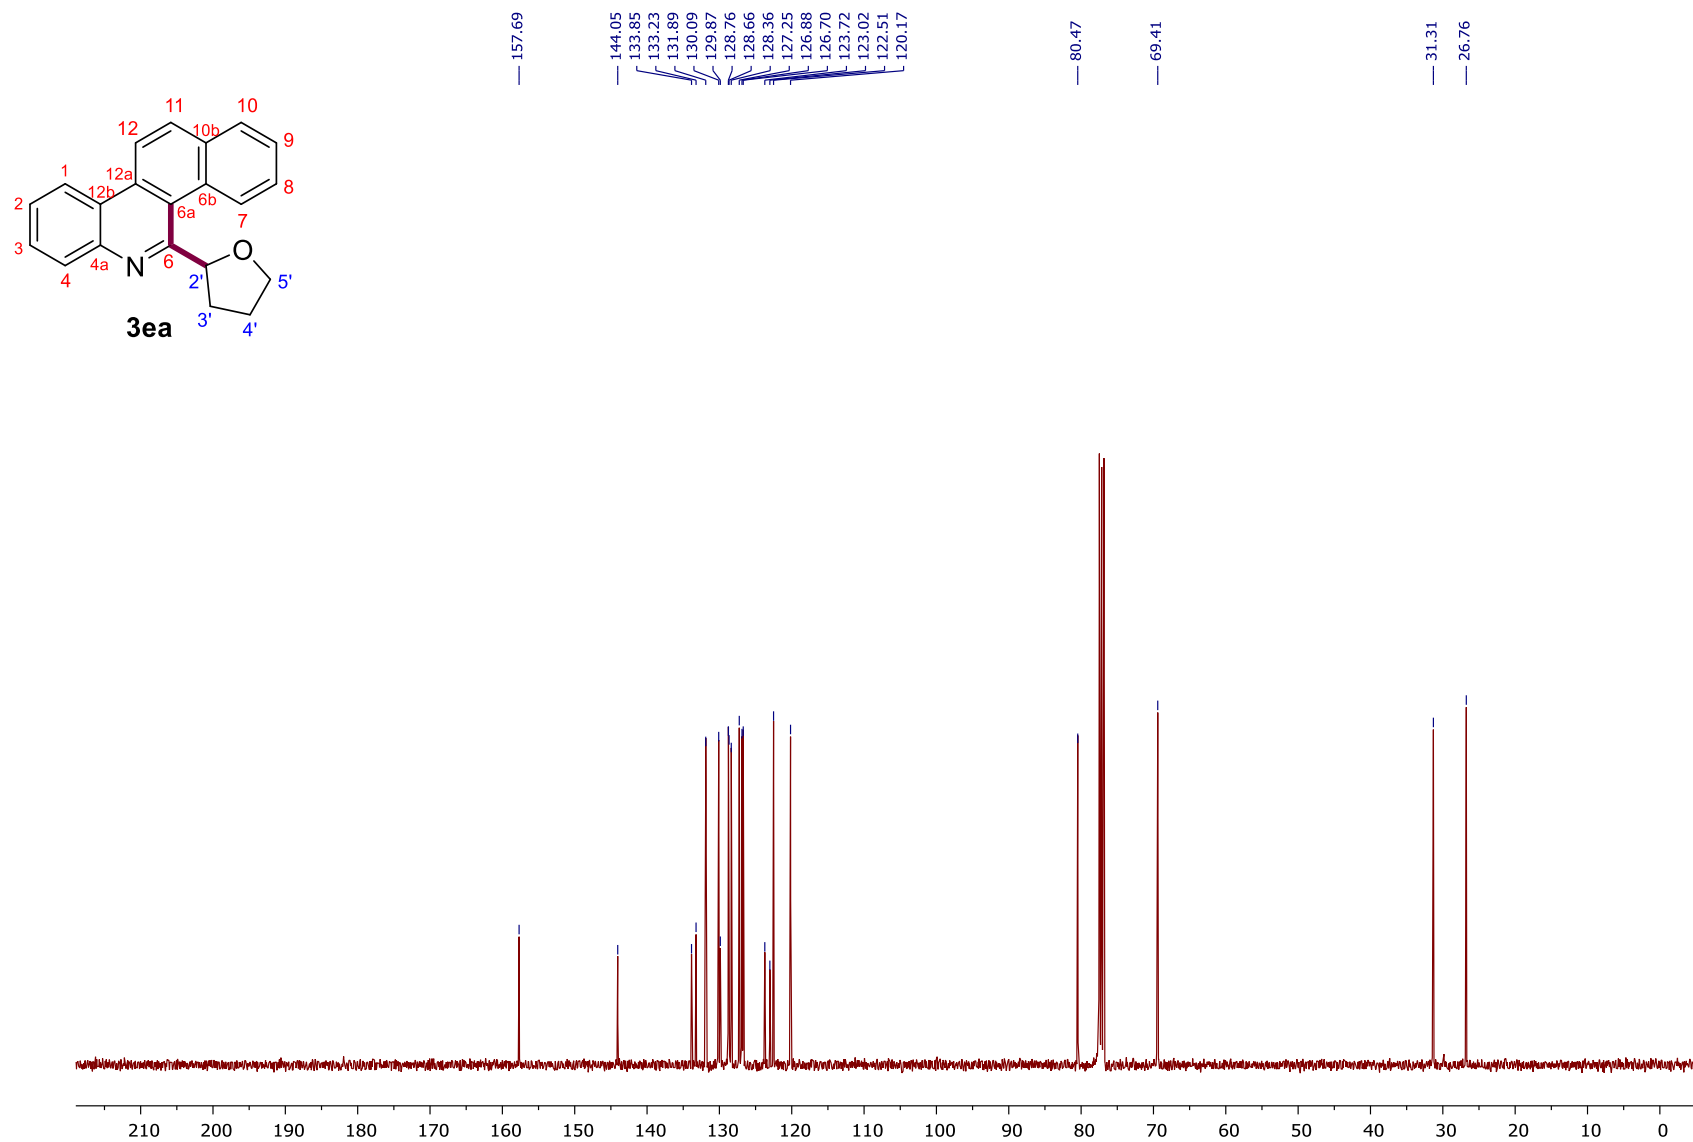

$^1\text{H}, ^1\text{H}$ -COSY of compound **3ea**

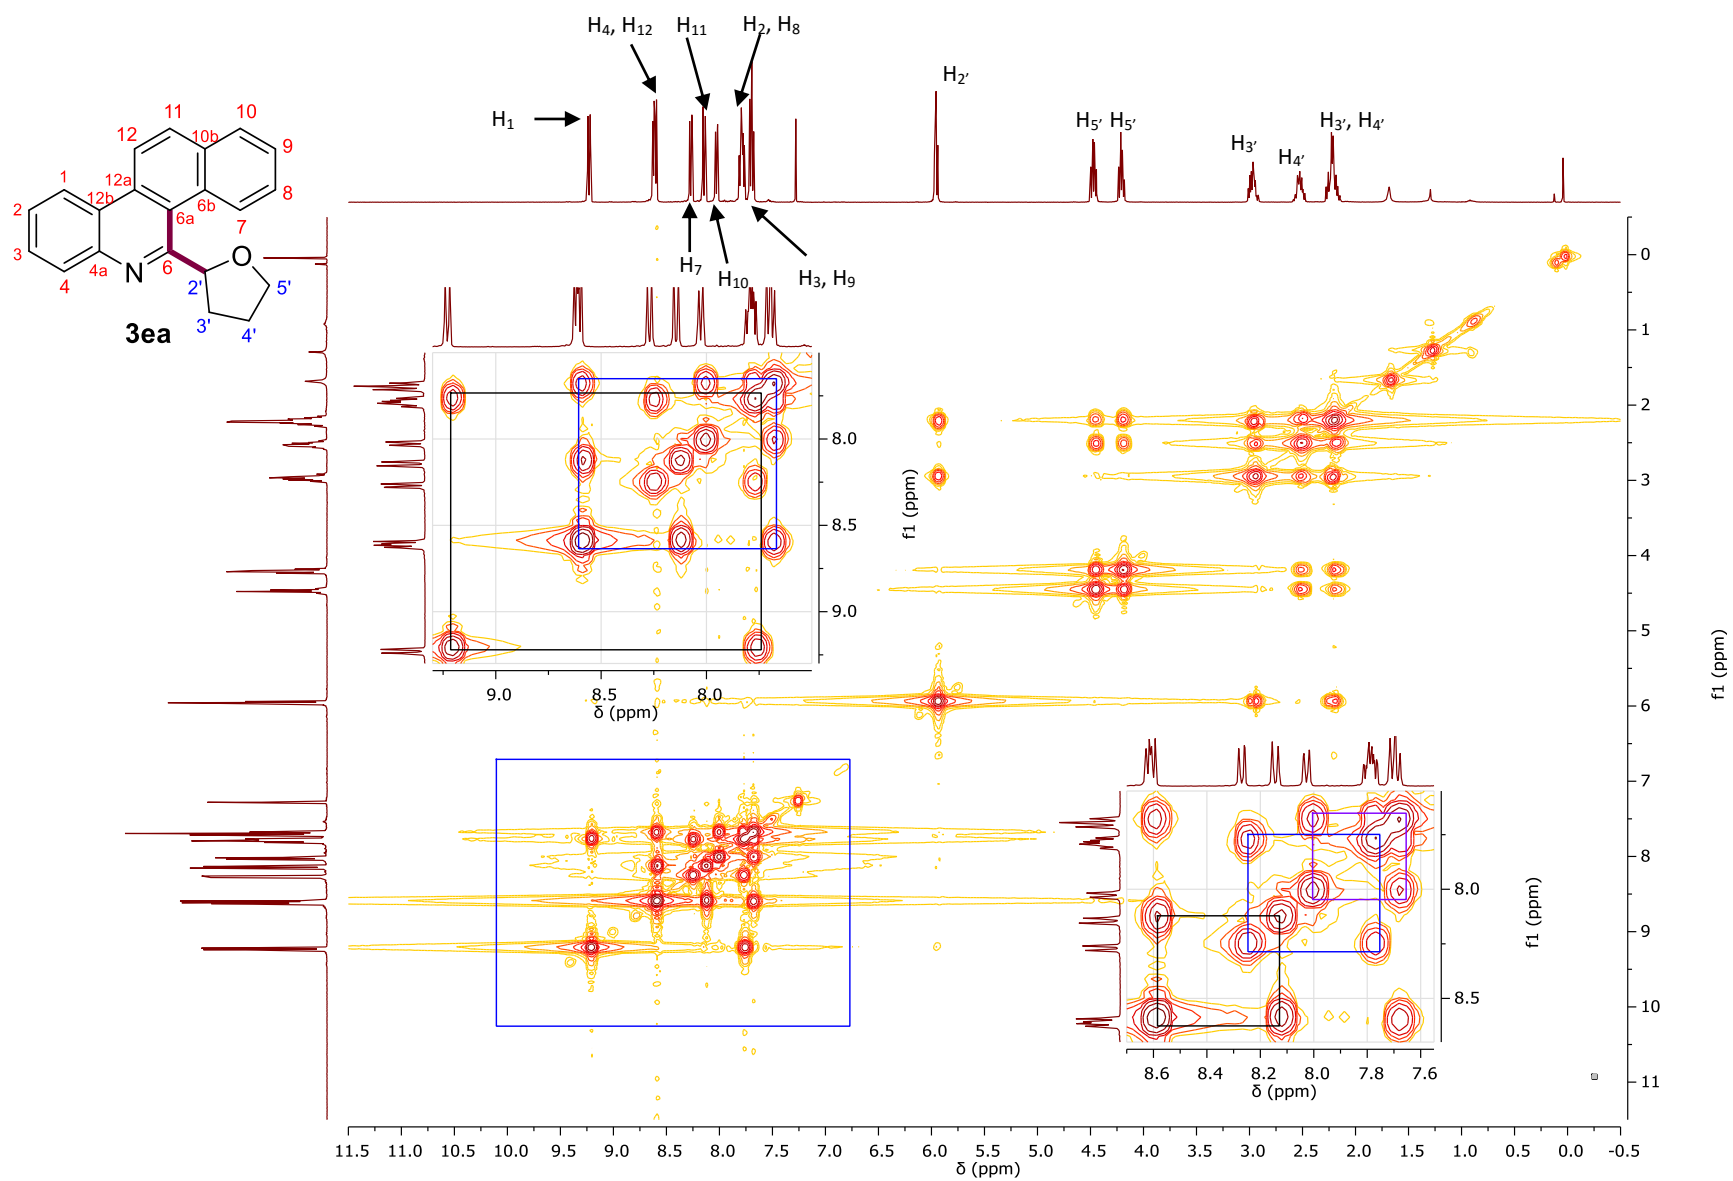

<sup>1</sup>H-NMR (300 MHz, CDCl<sub>3</sub>)

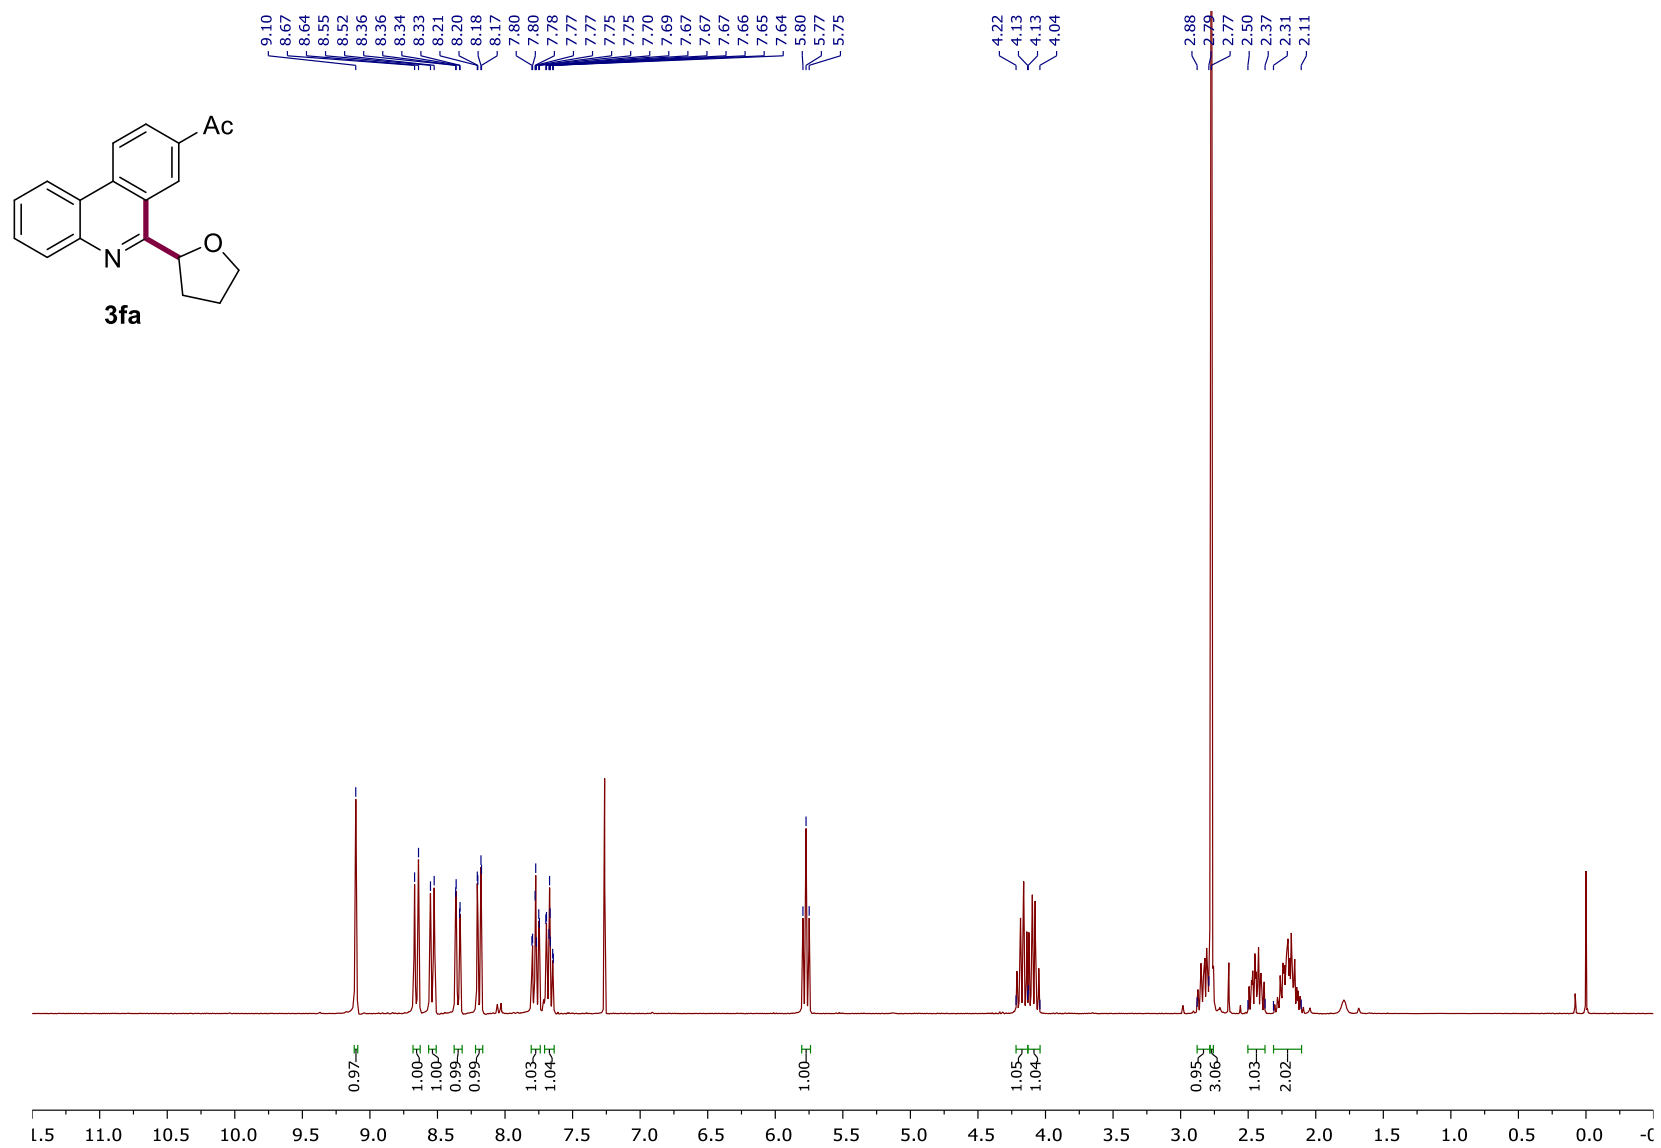

$^{13}\text{C}$ -NMR (101 MHz,  $\text{CDCl}_3$ )

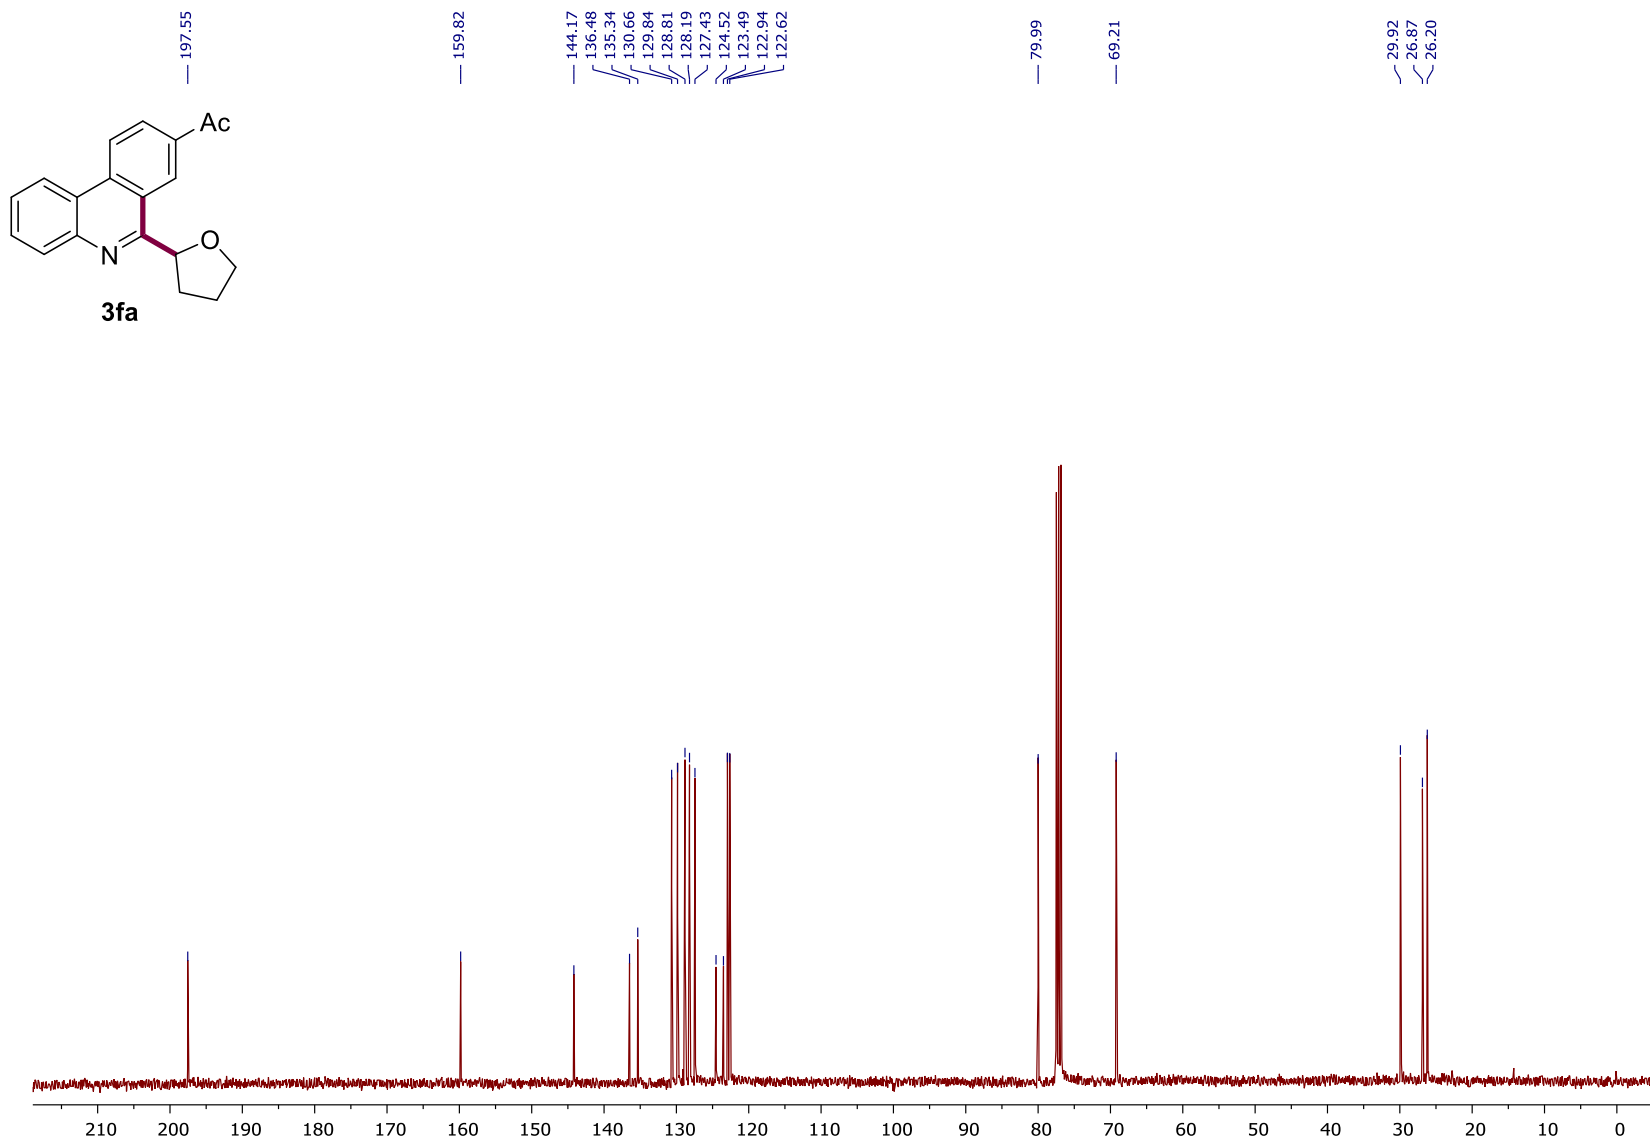

<sup>1</sup>H-NMR (300 MHz, CDCl<sub>3</sub>)

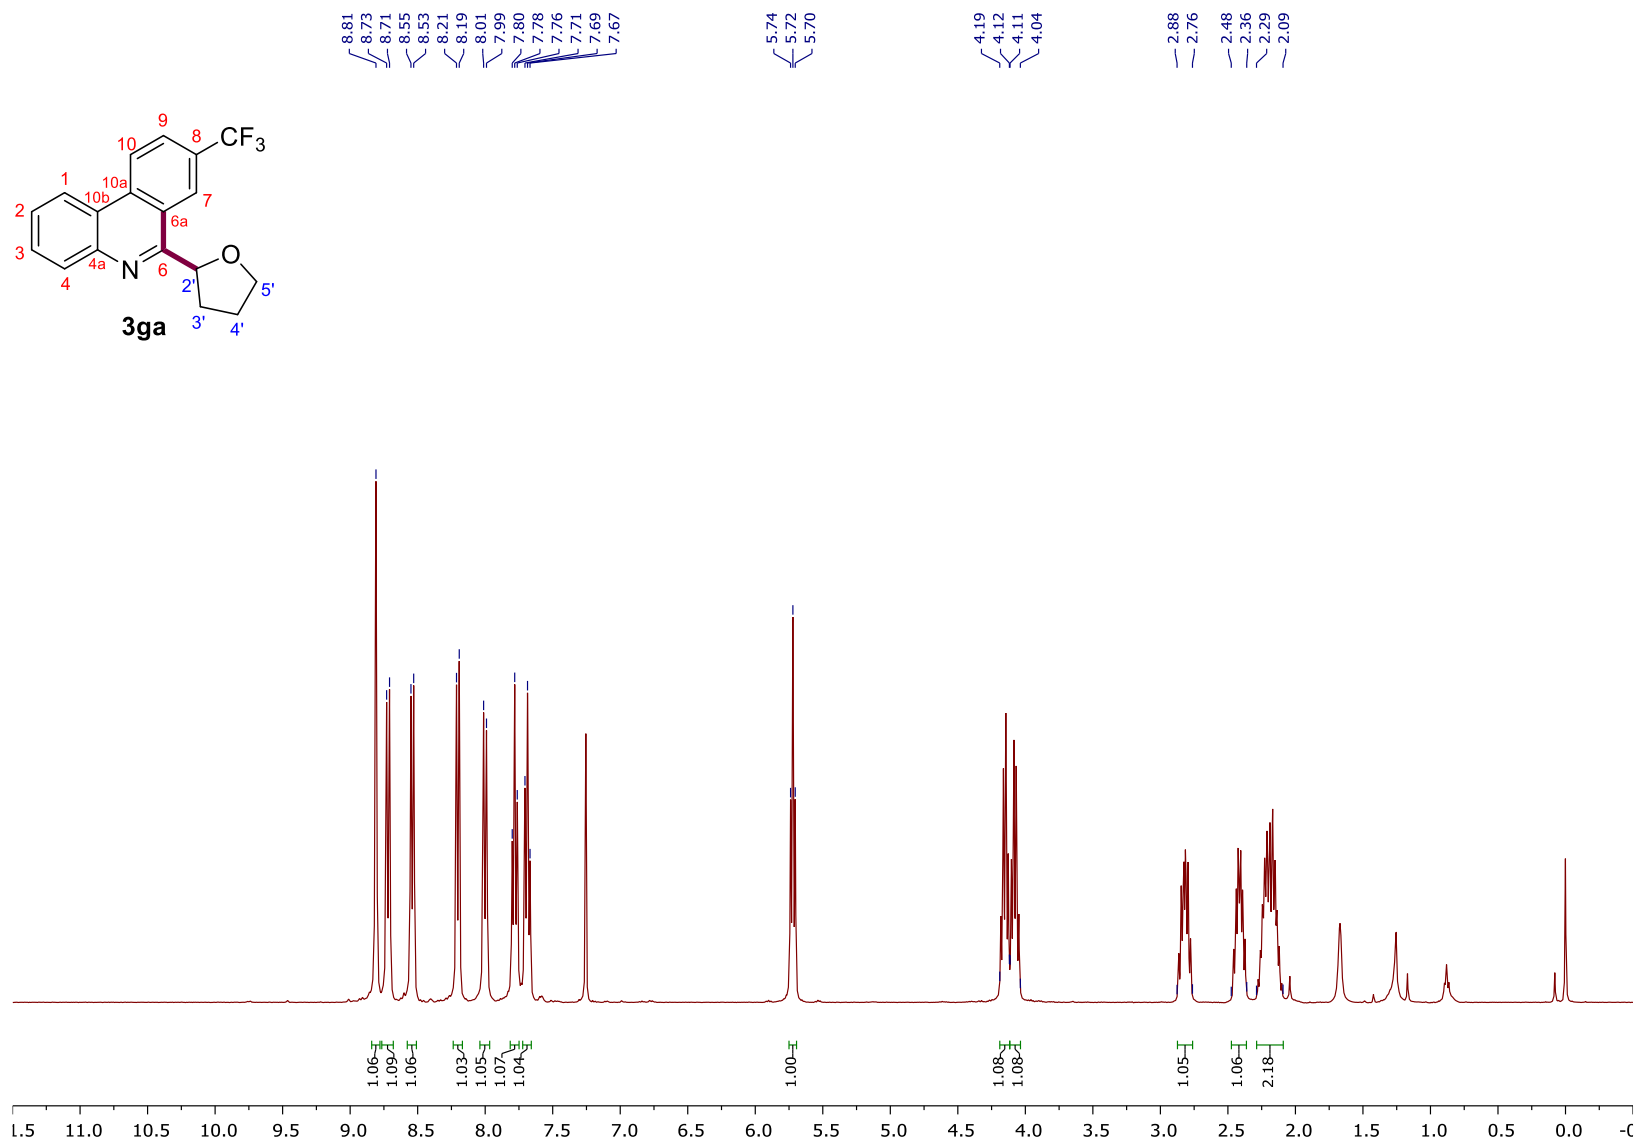

$^{13}\text{C}$ -NMR (101 MHz,  $\text{CDCl}_3$ )

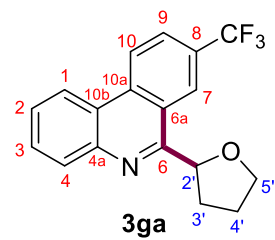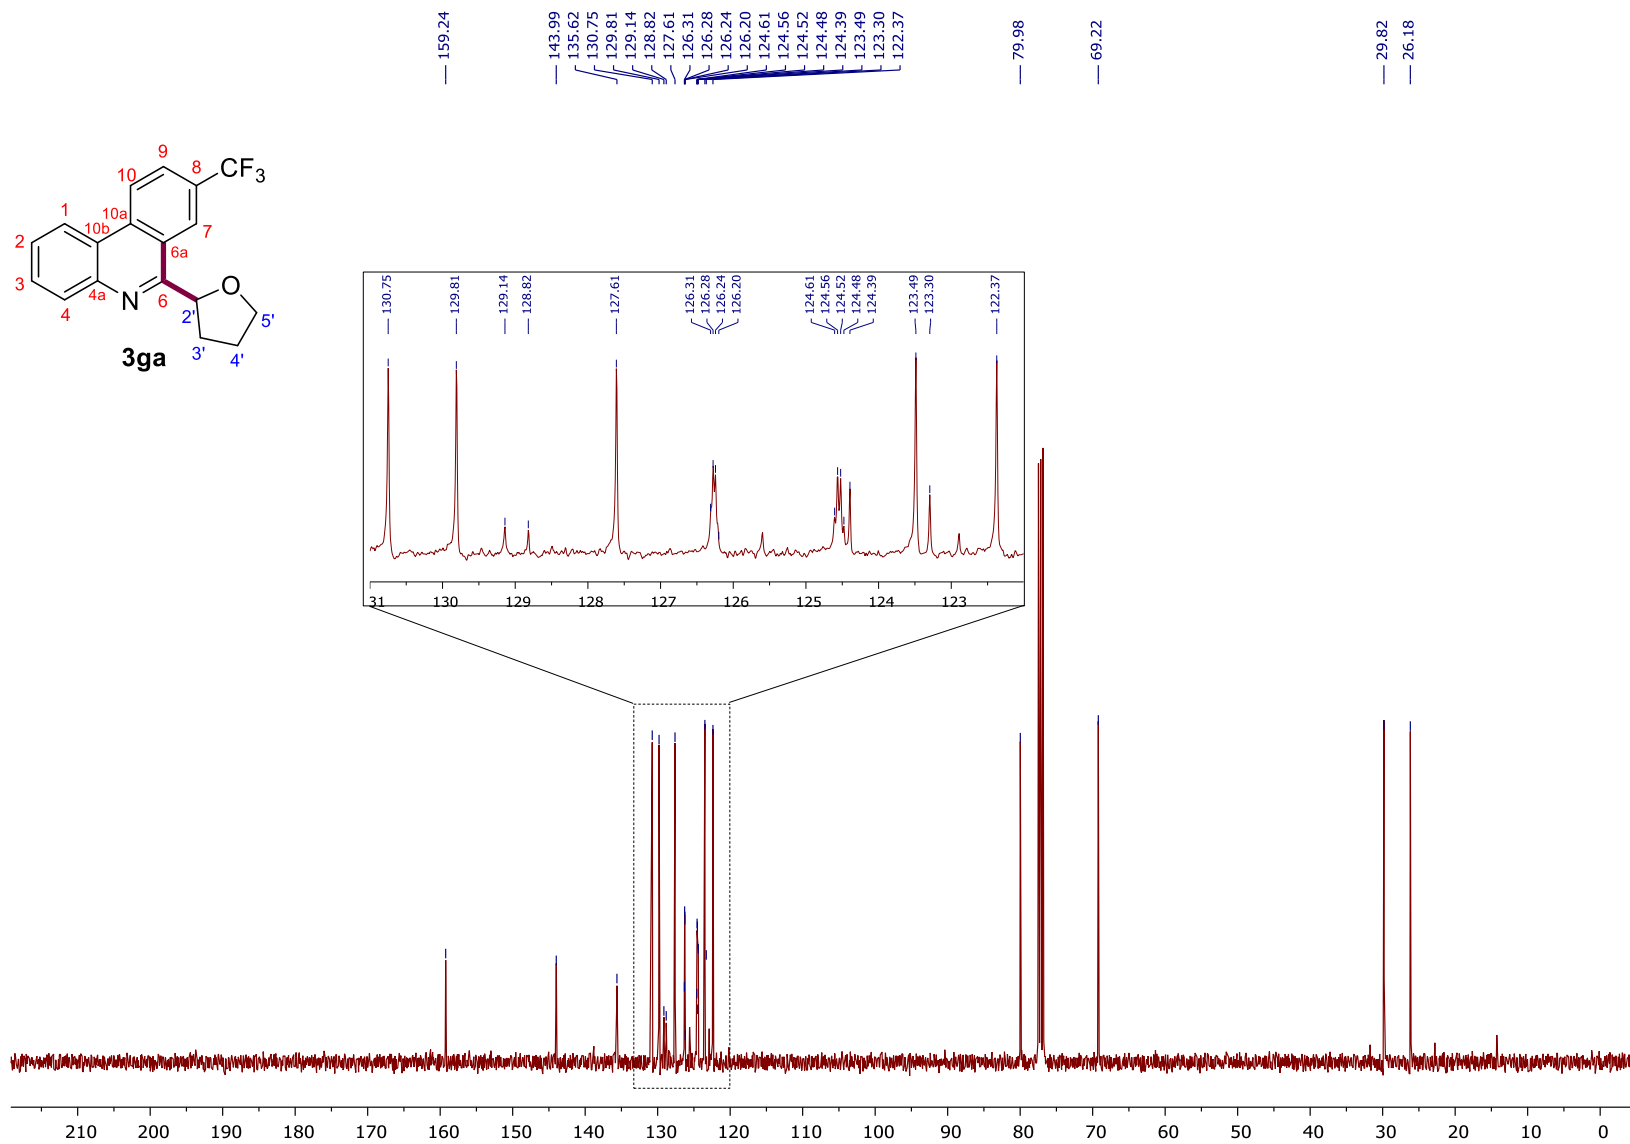

<sup>1</sup>H-NMR (300 MHz, CDCl<sub>3</sub>)

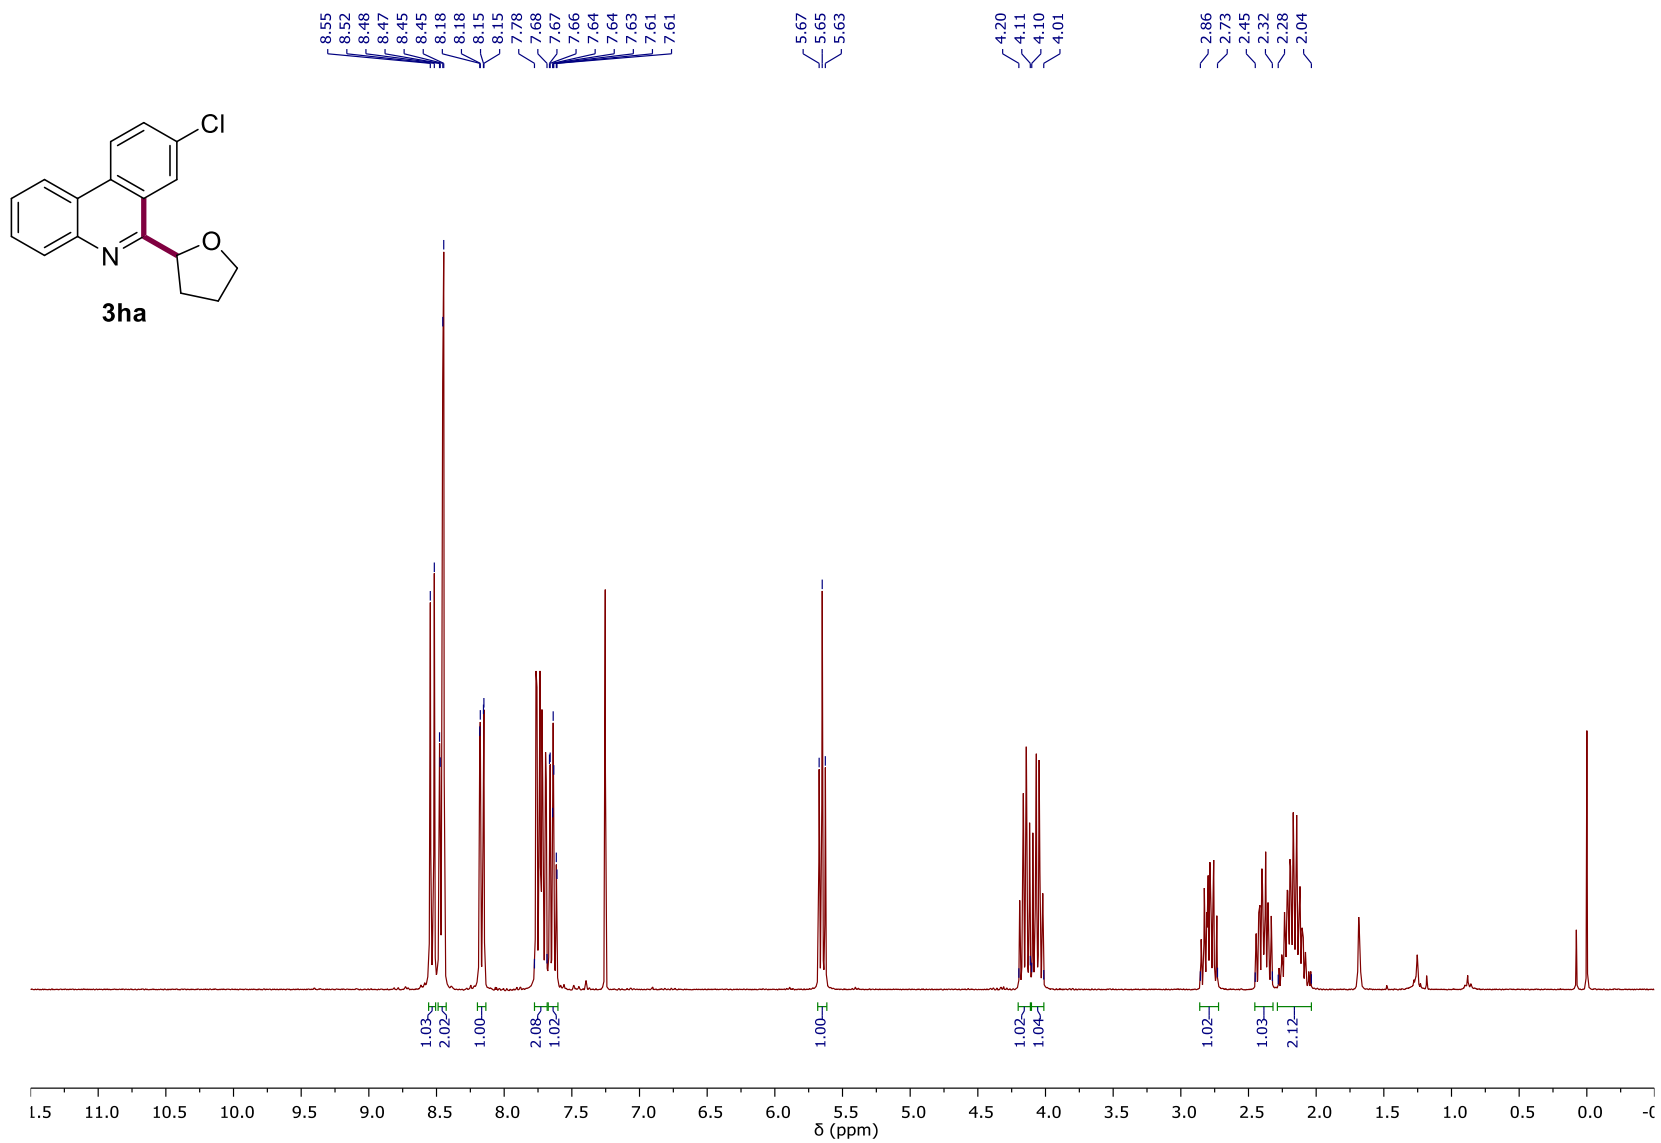



$^{13}\text{C}$ -NMR (101 MHz,  $\text{CDCl}_3$ )

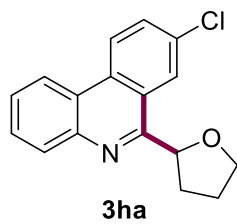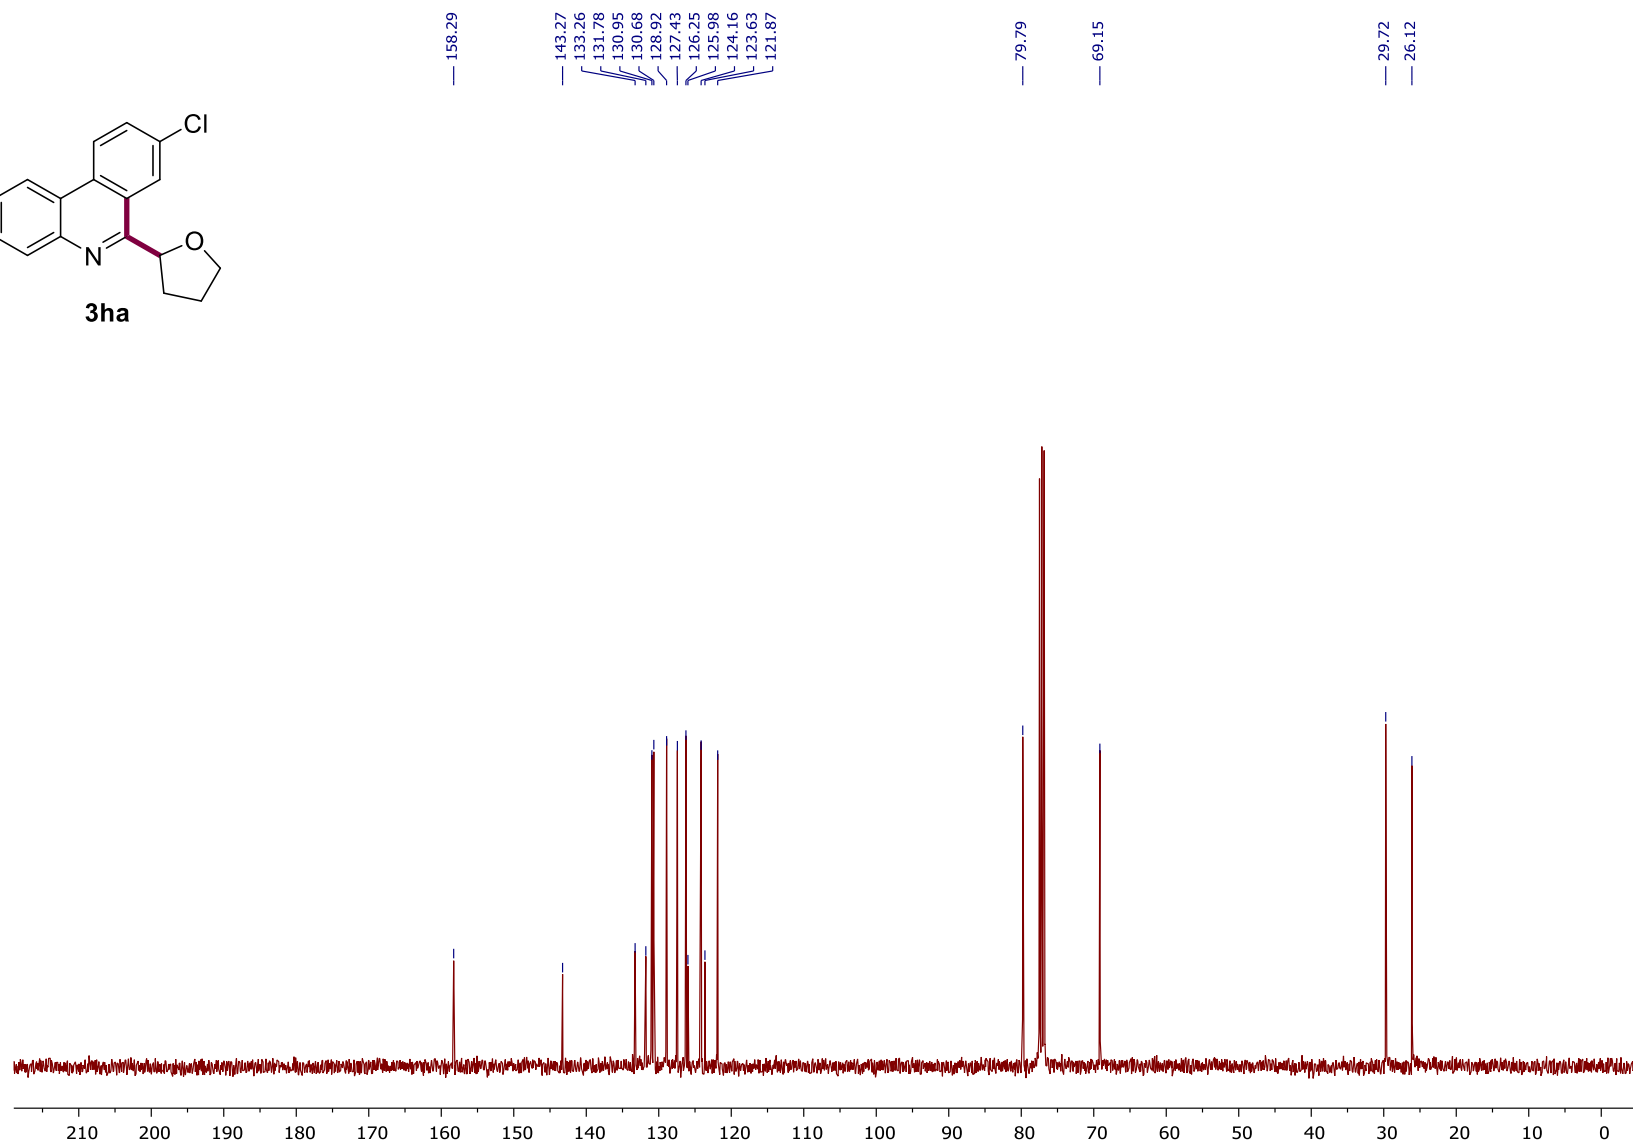

<sup>1</sup>H-NMR (400 MHz, CDCl<sub>3</sub>)

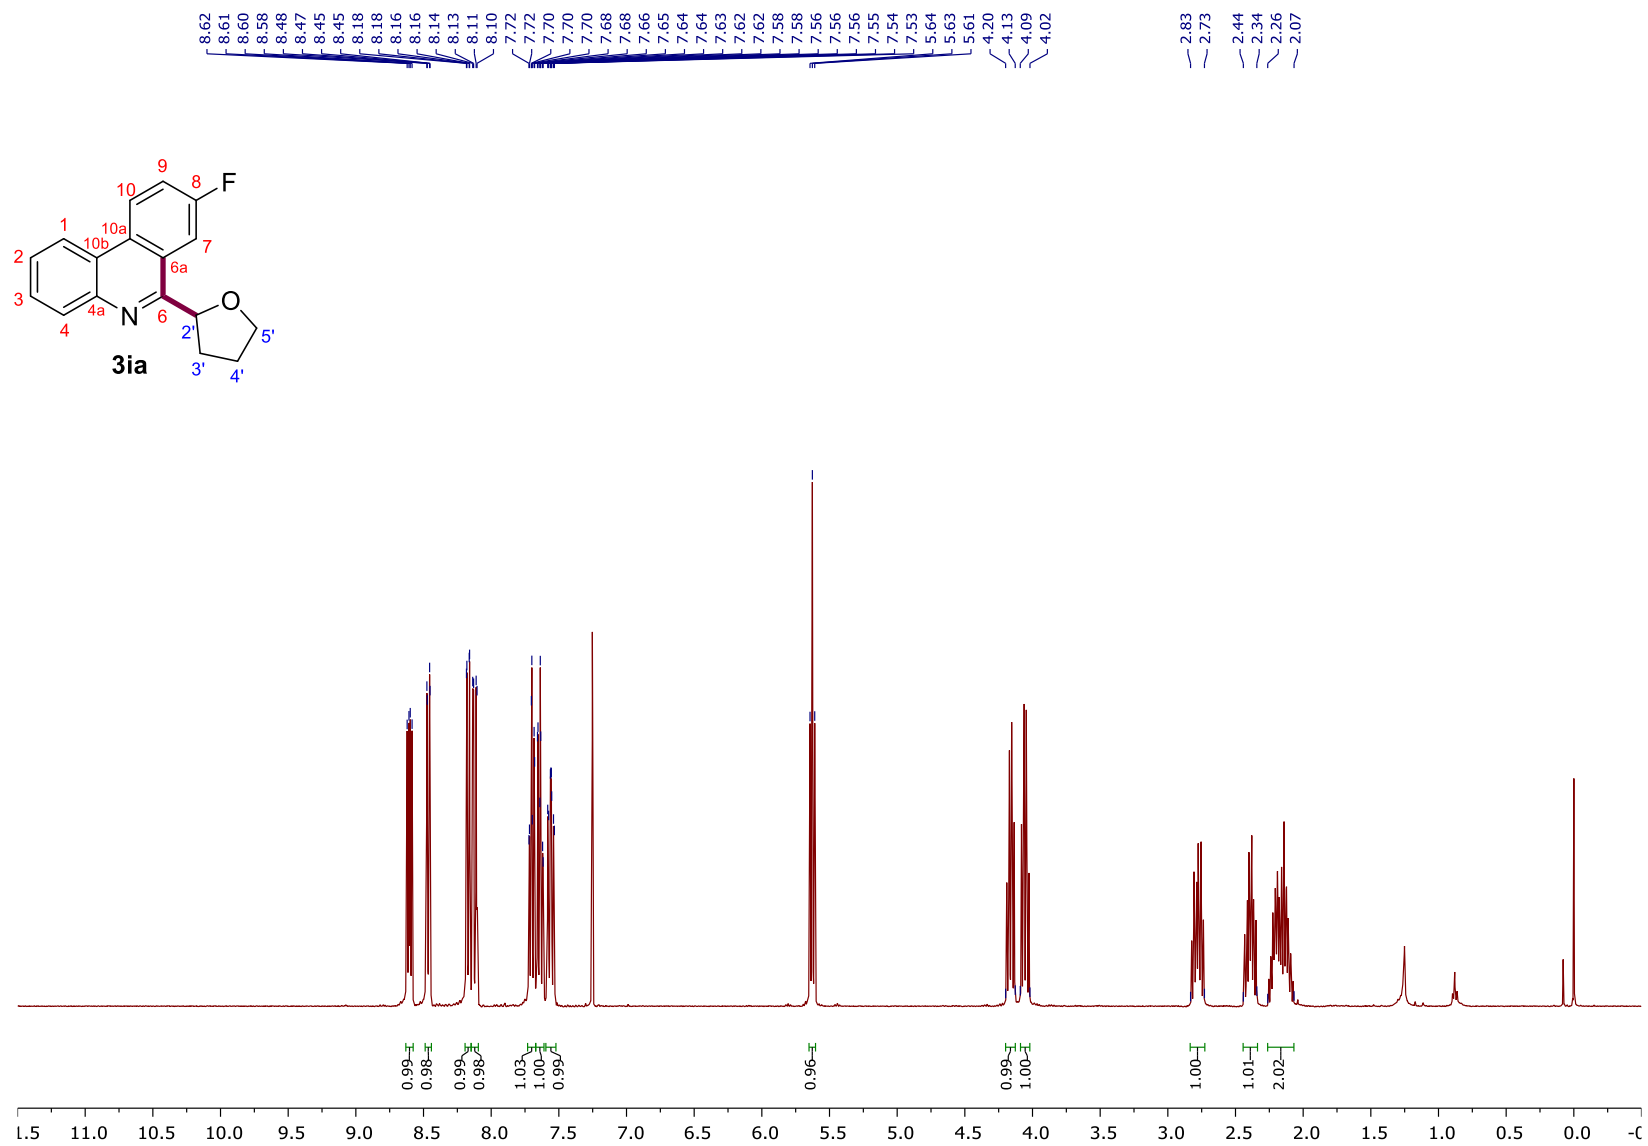

$^{13}\text{C}$ -NMR (101 MHz,  $\text{CDCl}_3$ )

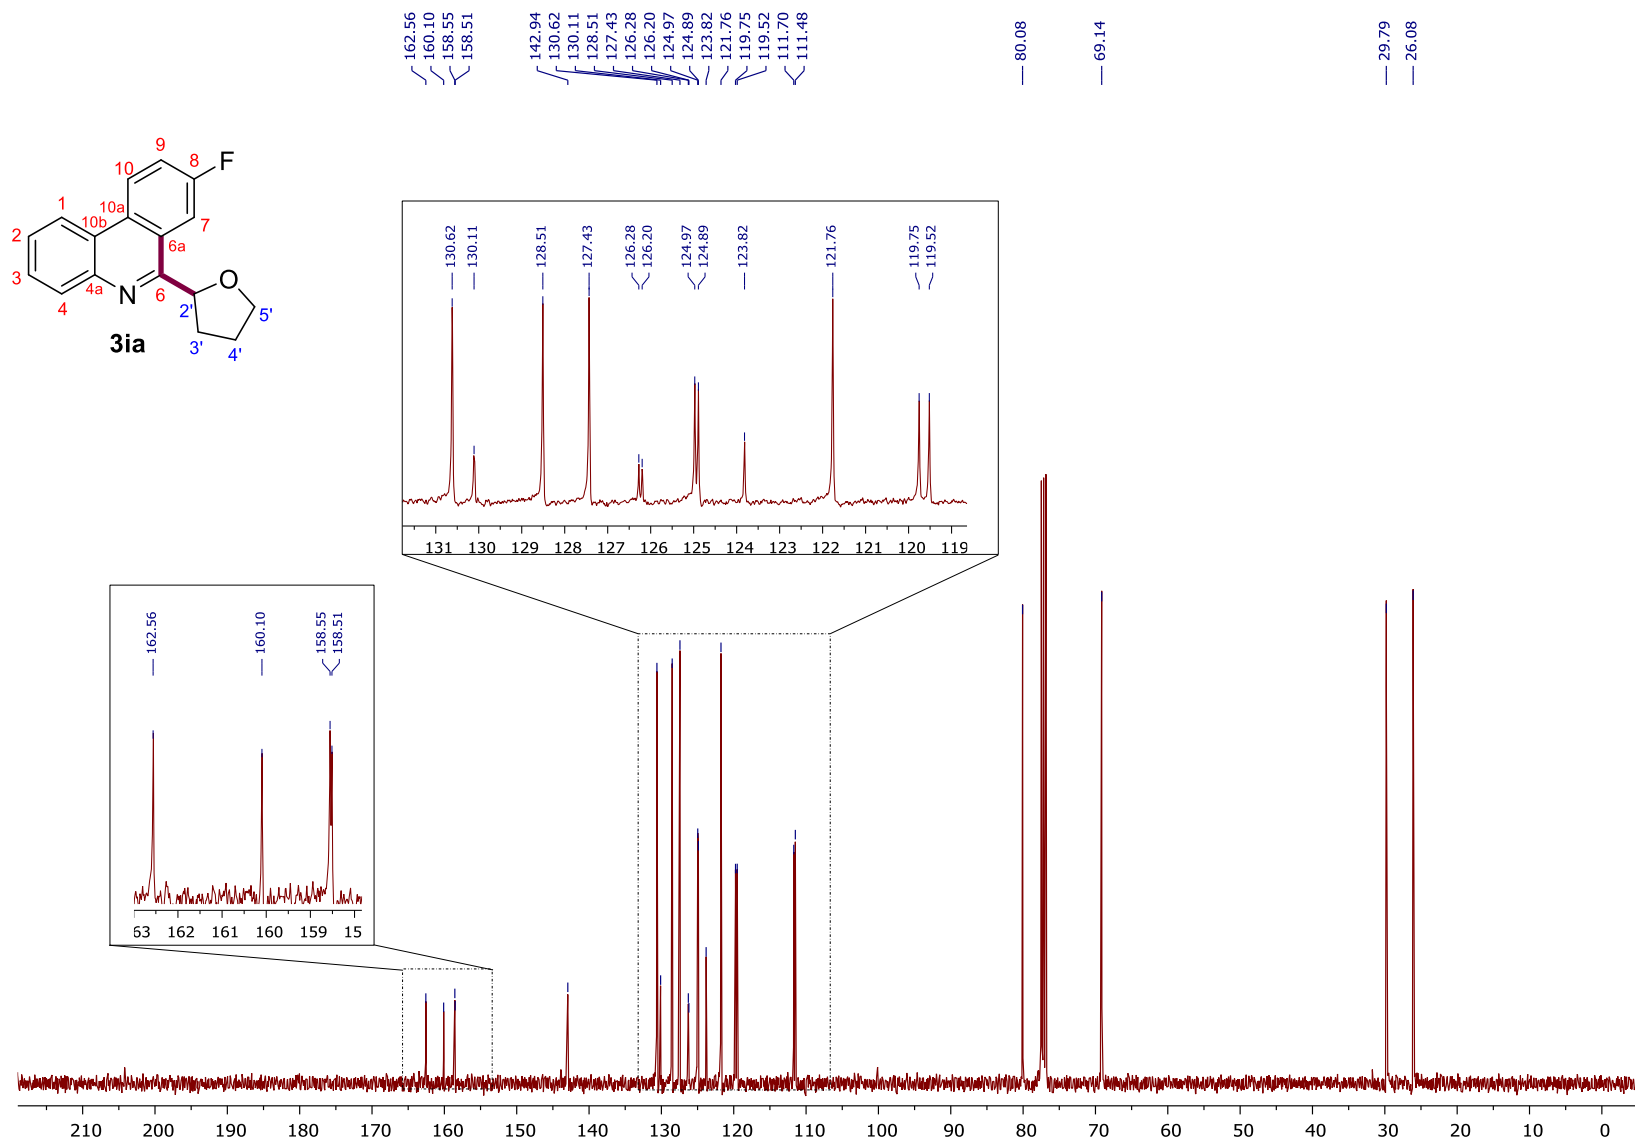

<sup>1</sup>H-NMR (400 MHz, CDCl<sub>3</sub>)

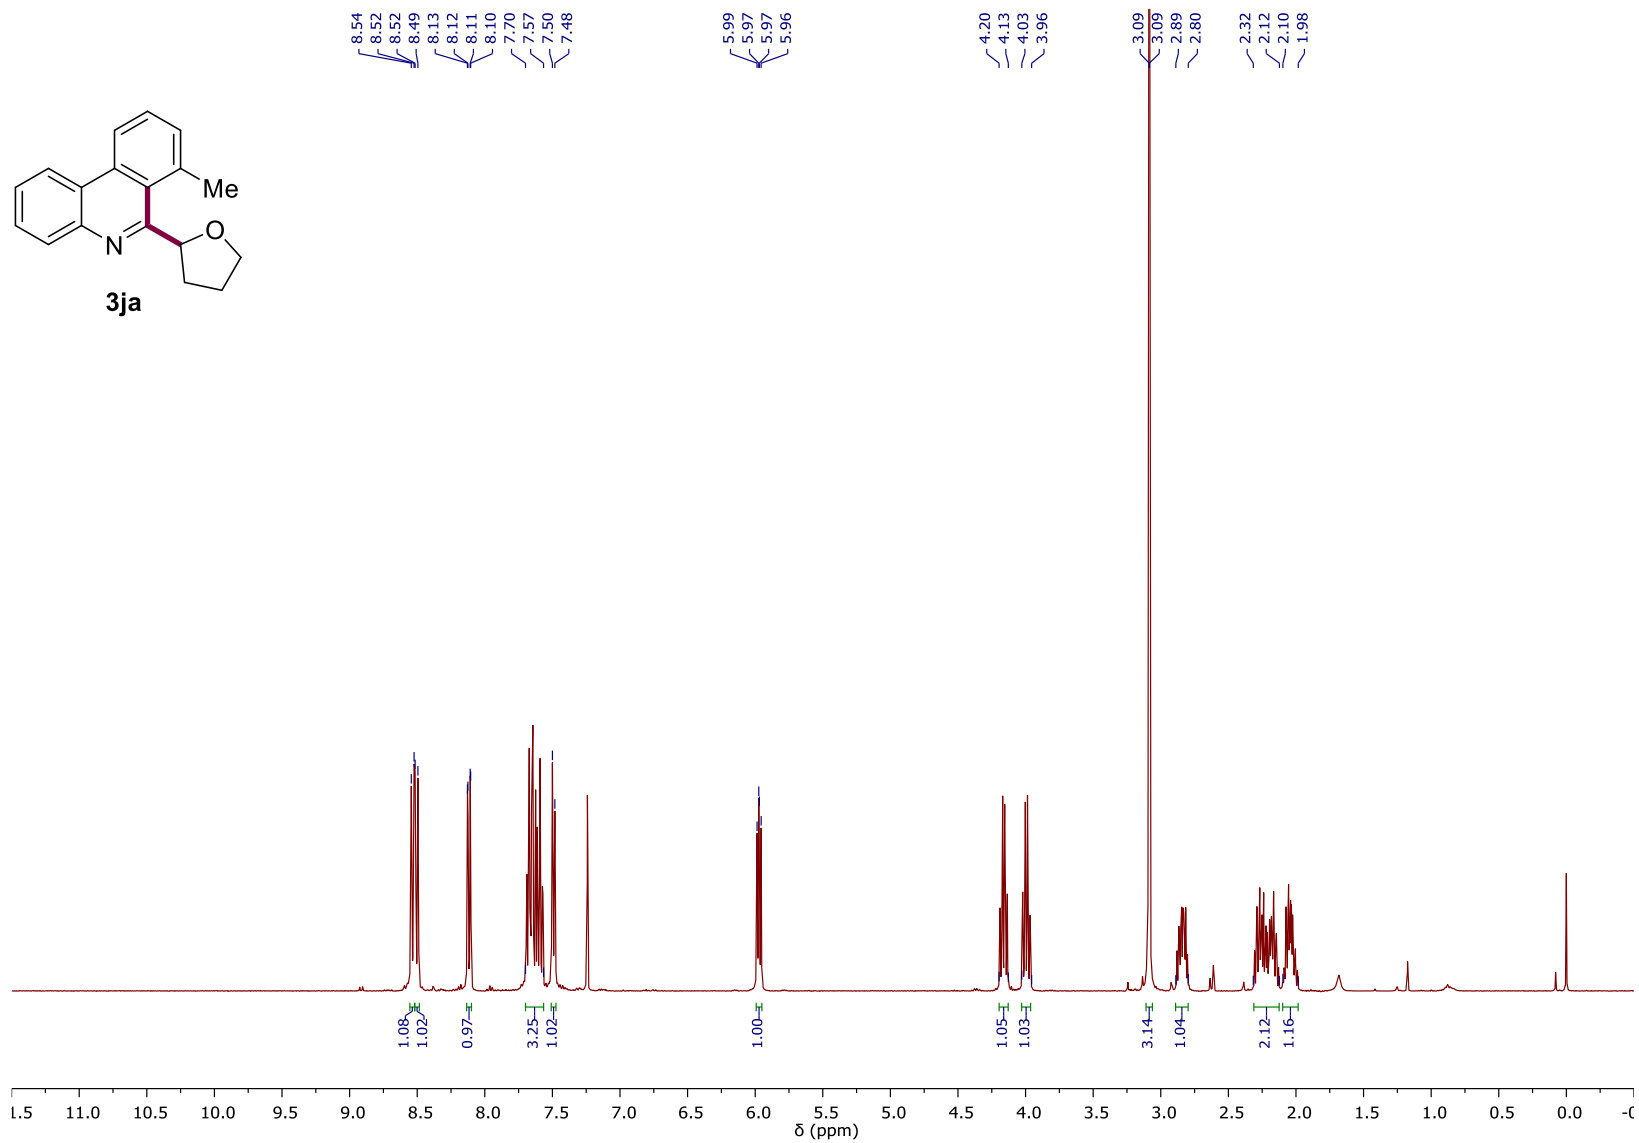

<sup>13</sup>C-NMR (101 MHz, CDCl<sub>3</sub>)

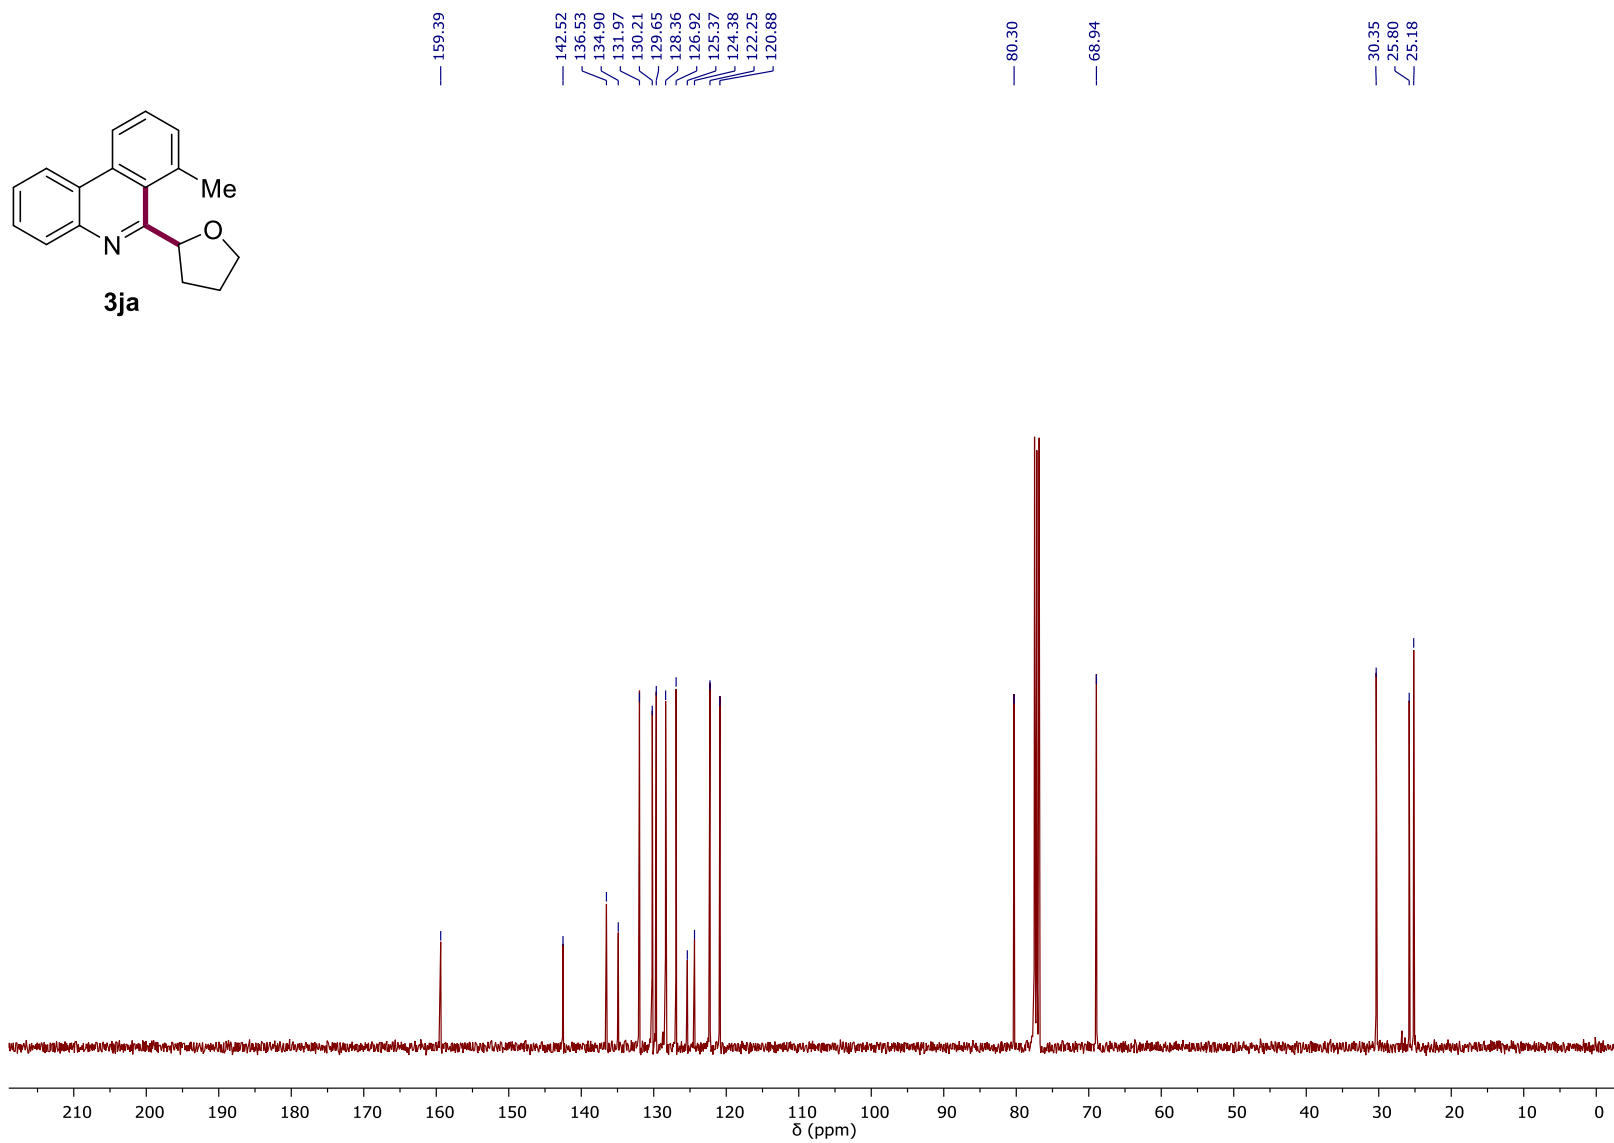

<sup>1</sup>H-NMR (400 MHz, CDCl<sub>3</sub>)

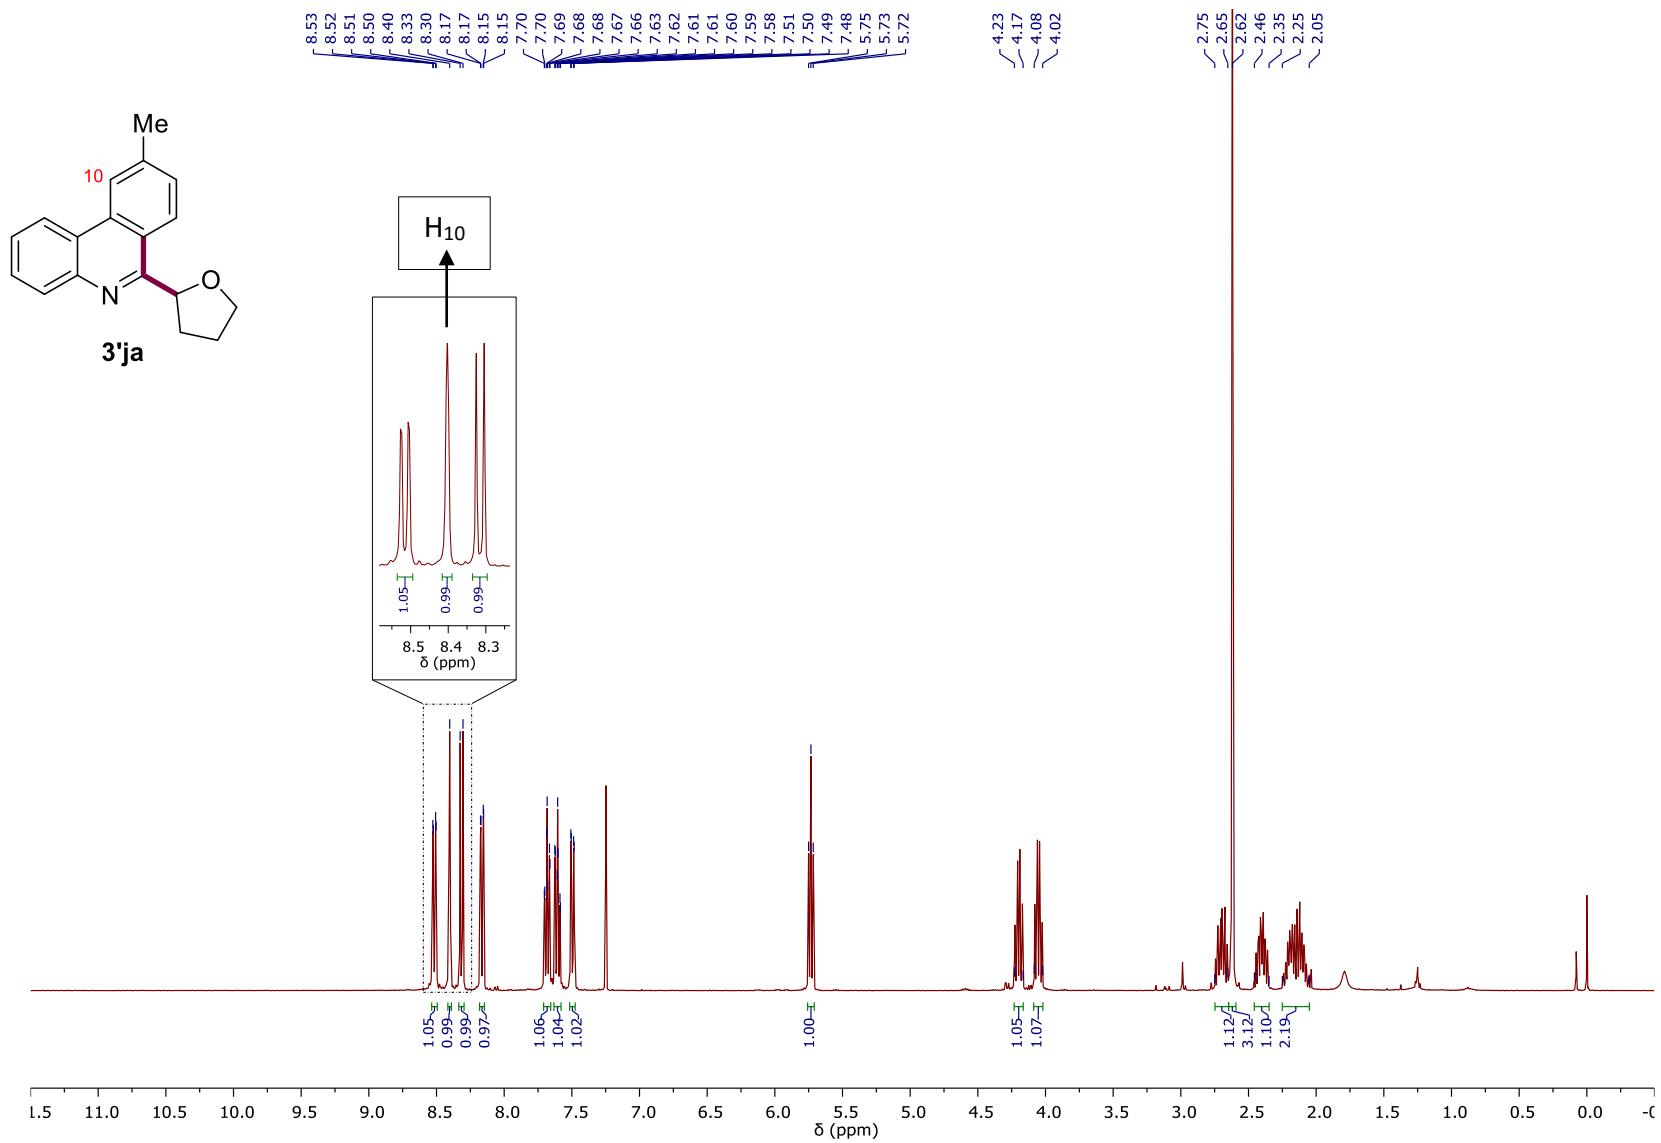

$^{13}\text{C}$ -NMR (101 MHz,  $\text{CDCl}_3$ )

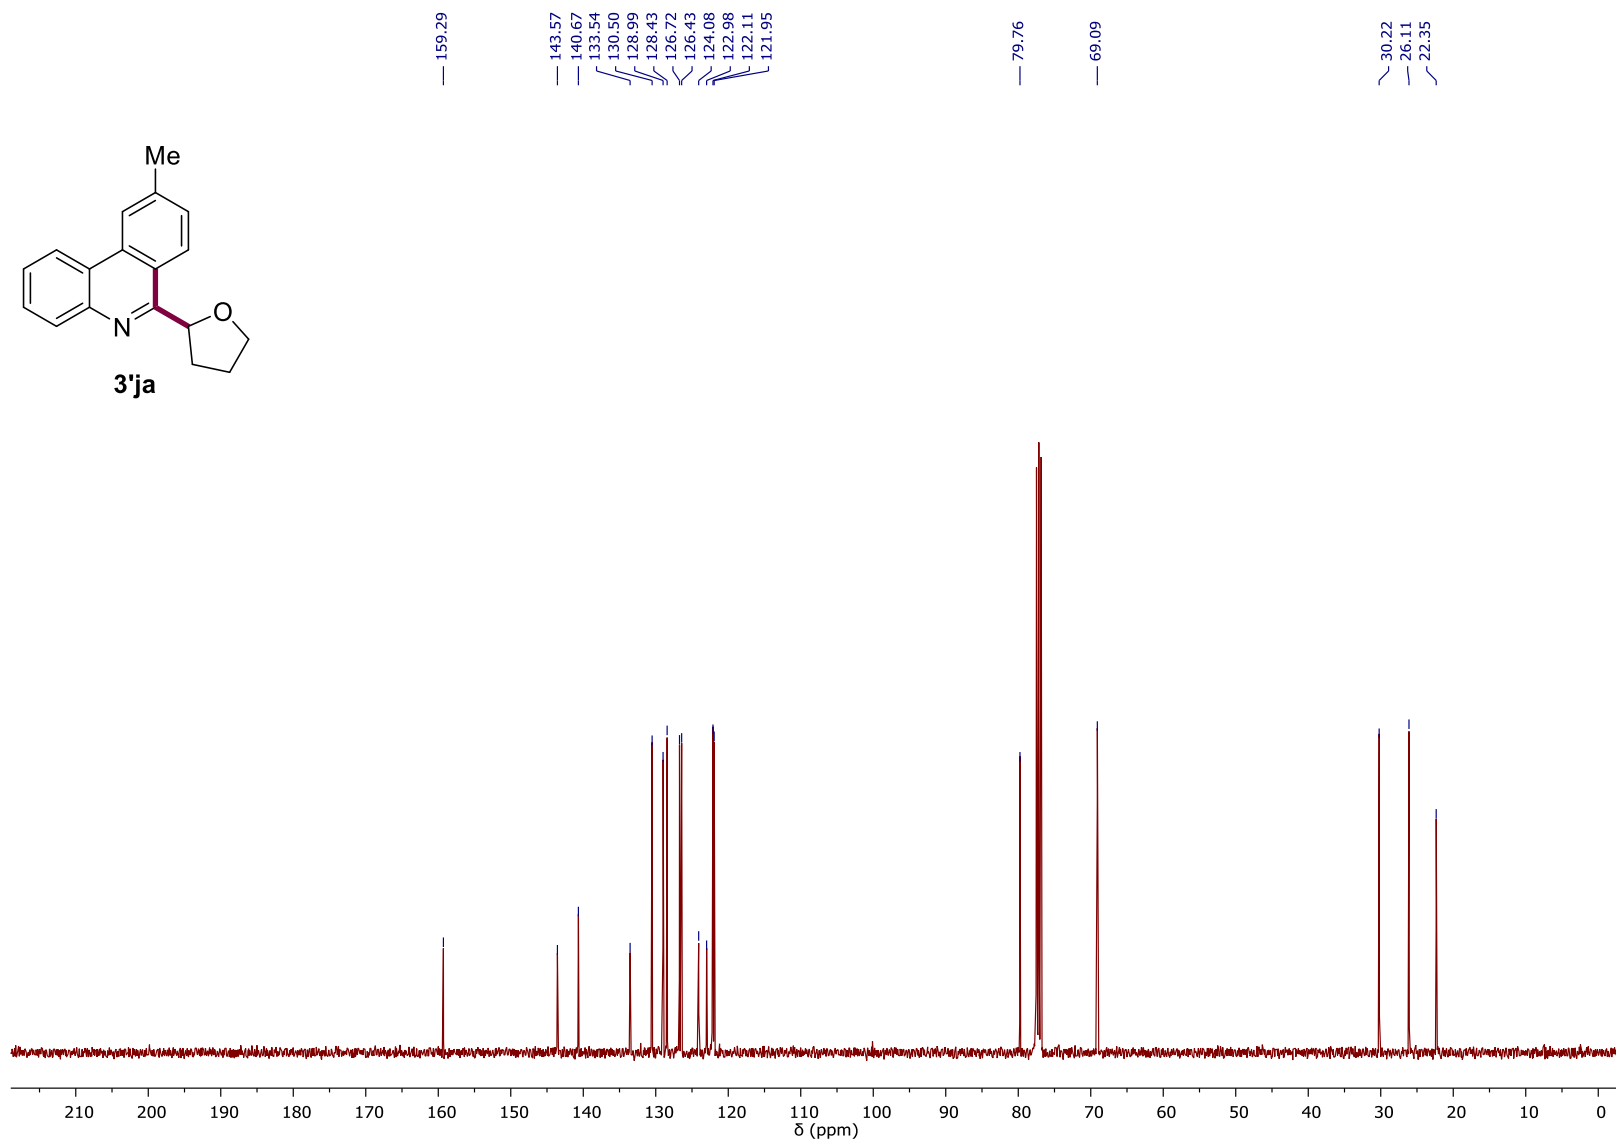

<sup>1</sup>H-NMR (300 MHz, CDCl<sub>3</sub>)

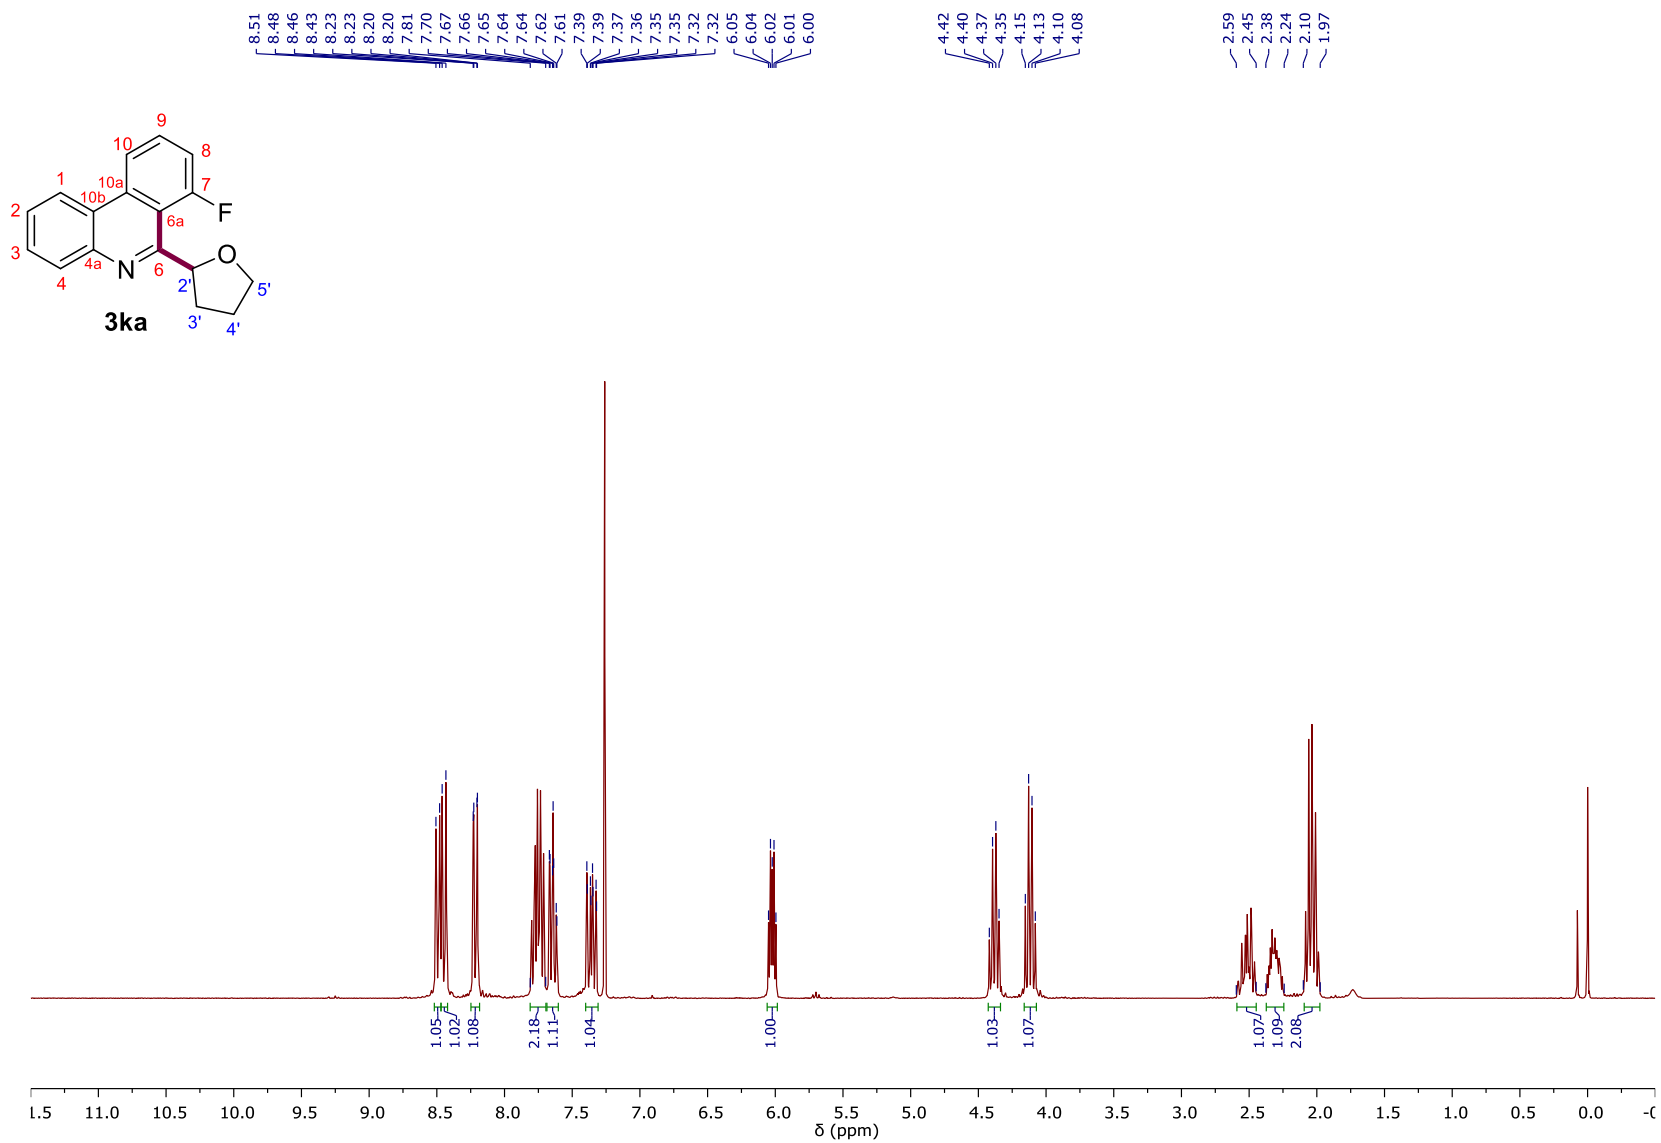



$^{13}\text{C}$ -NMR (75 MHz,  $\text{CDCl}_3$ )

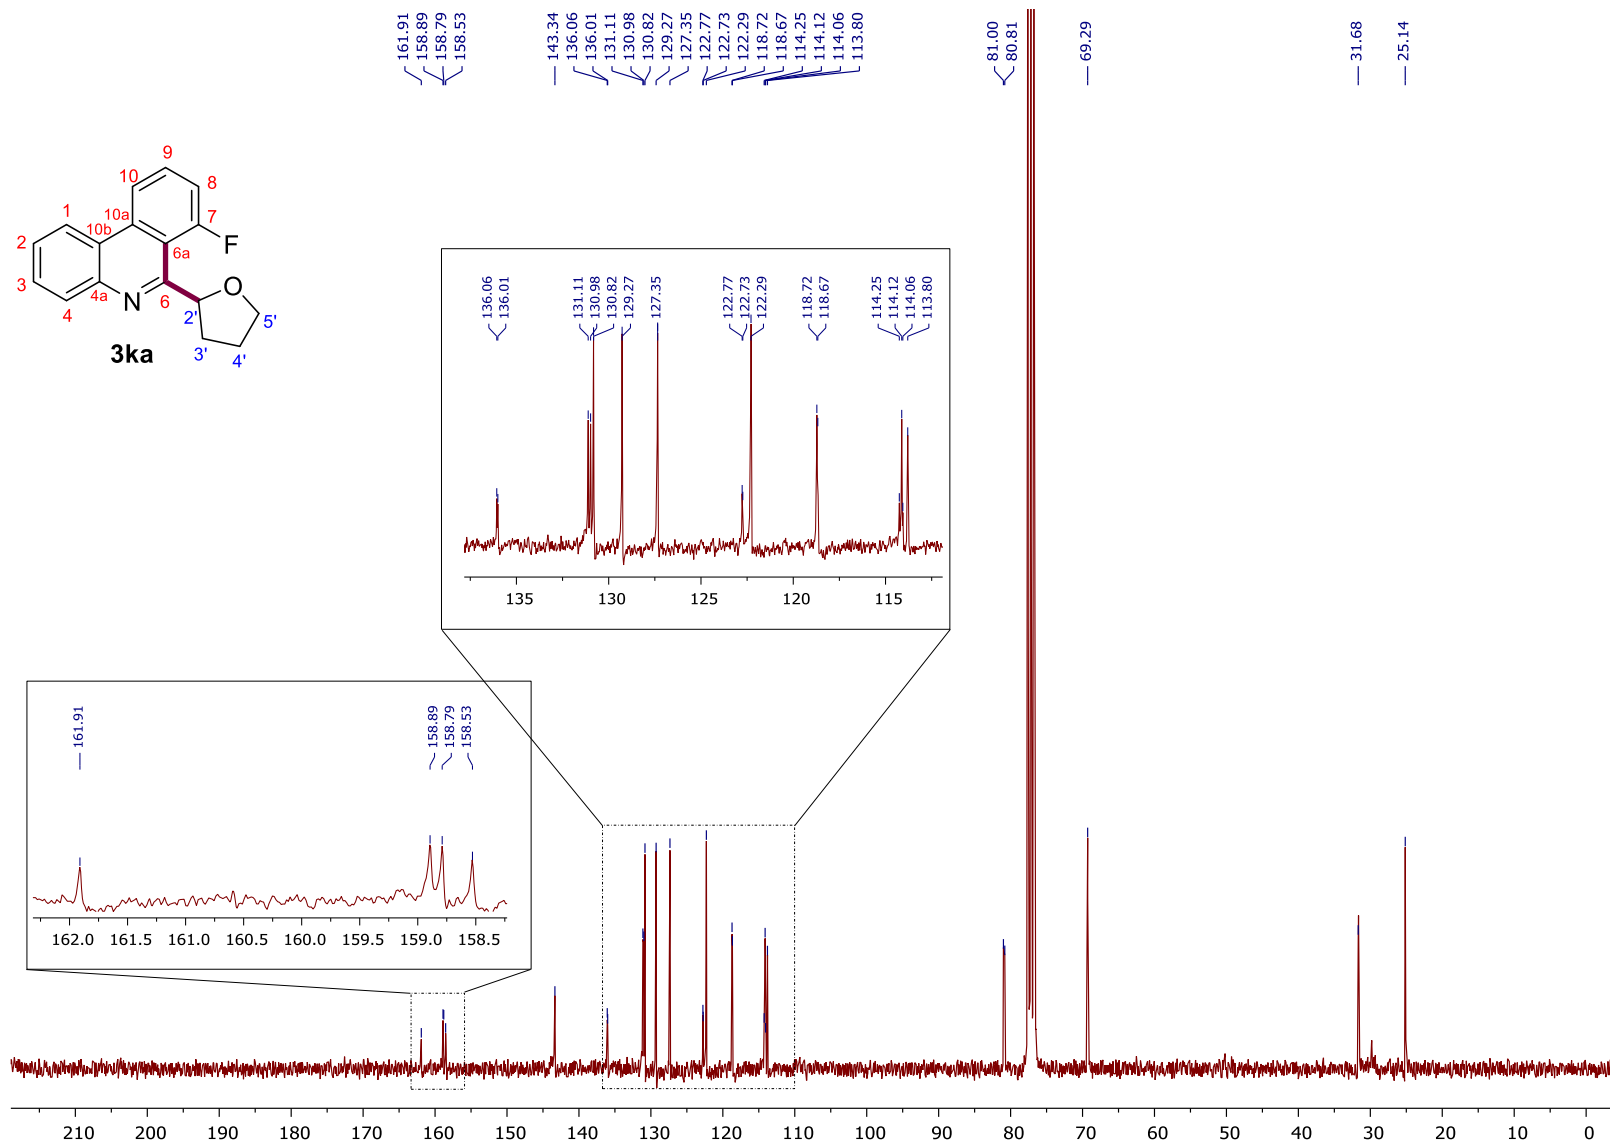

<sup>1</sup>H-NMR (300 MHz, CDCl<sub>3</sub>)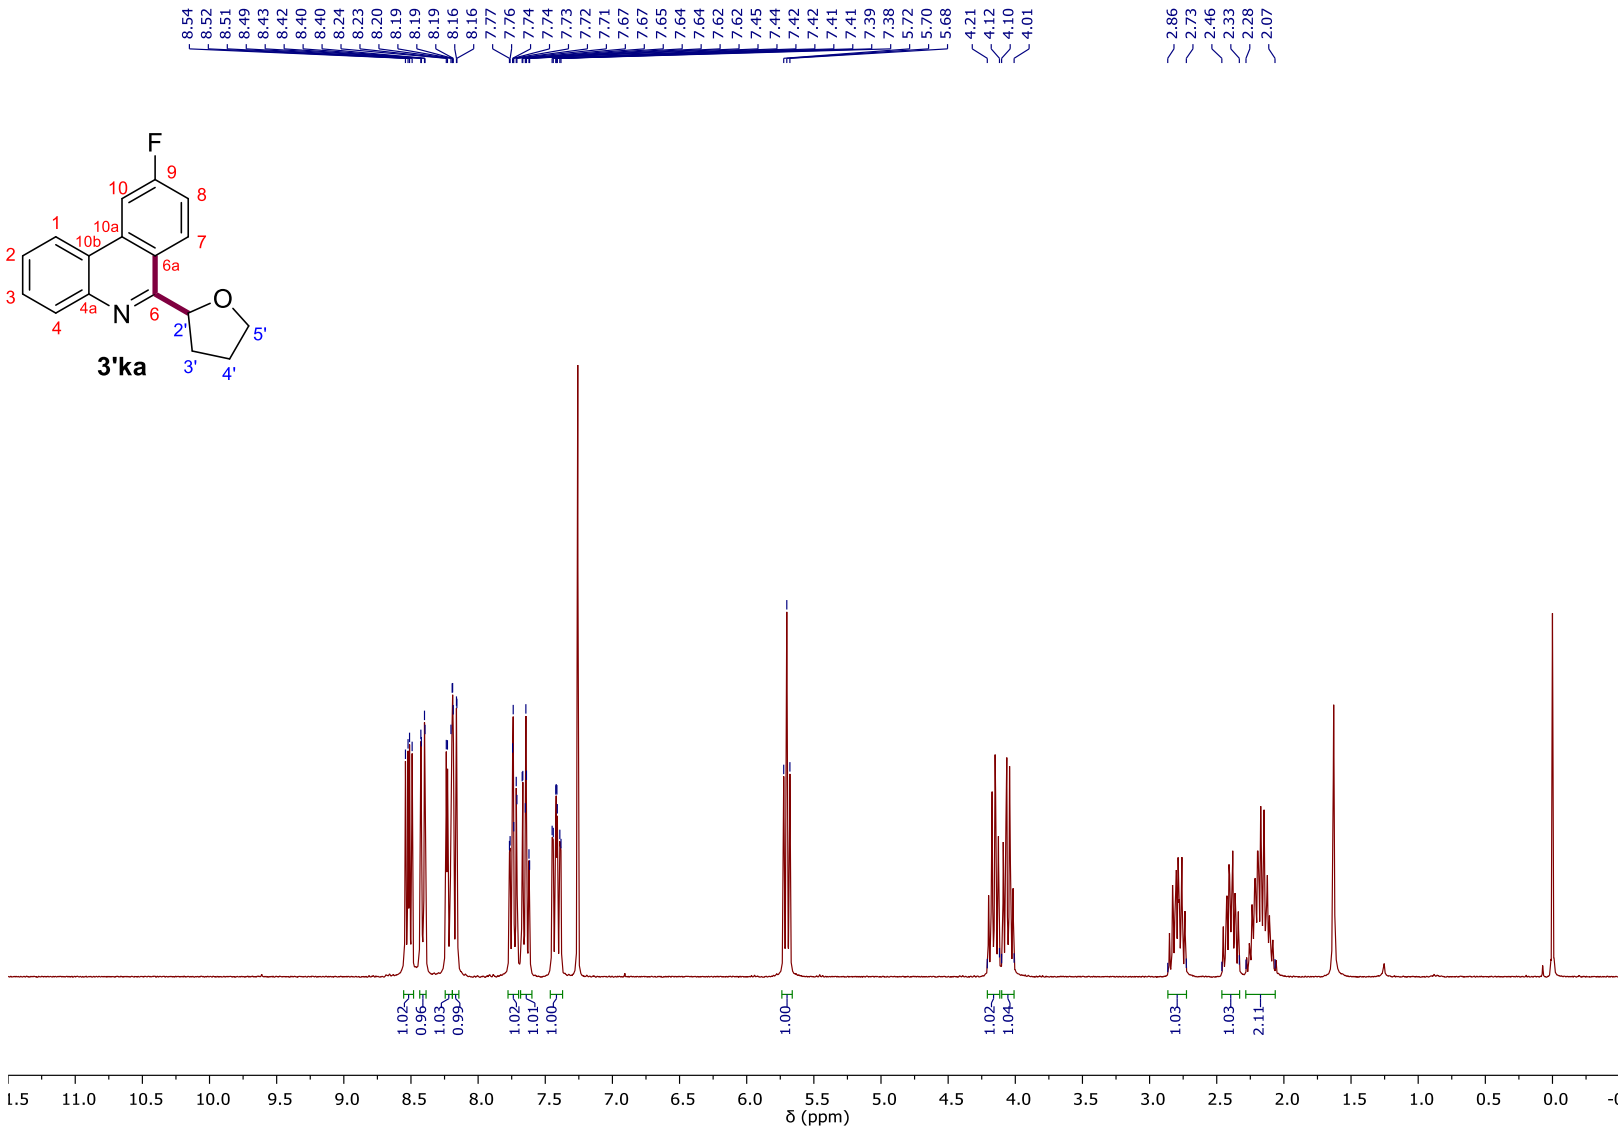

$^{13}\text{C}$ -NMR (101 MHz,  $\text{CDCl}_3$ )

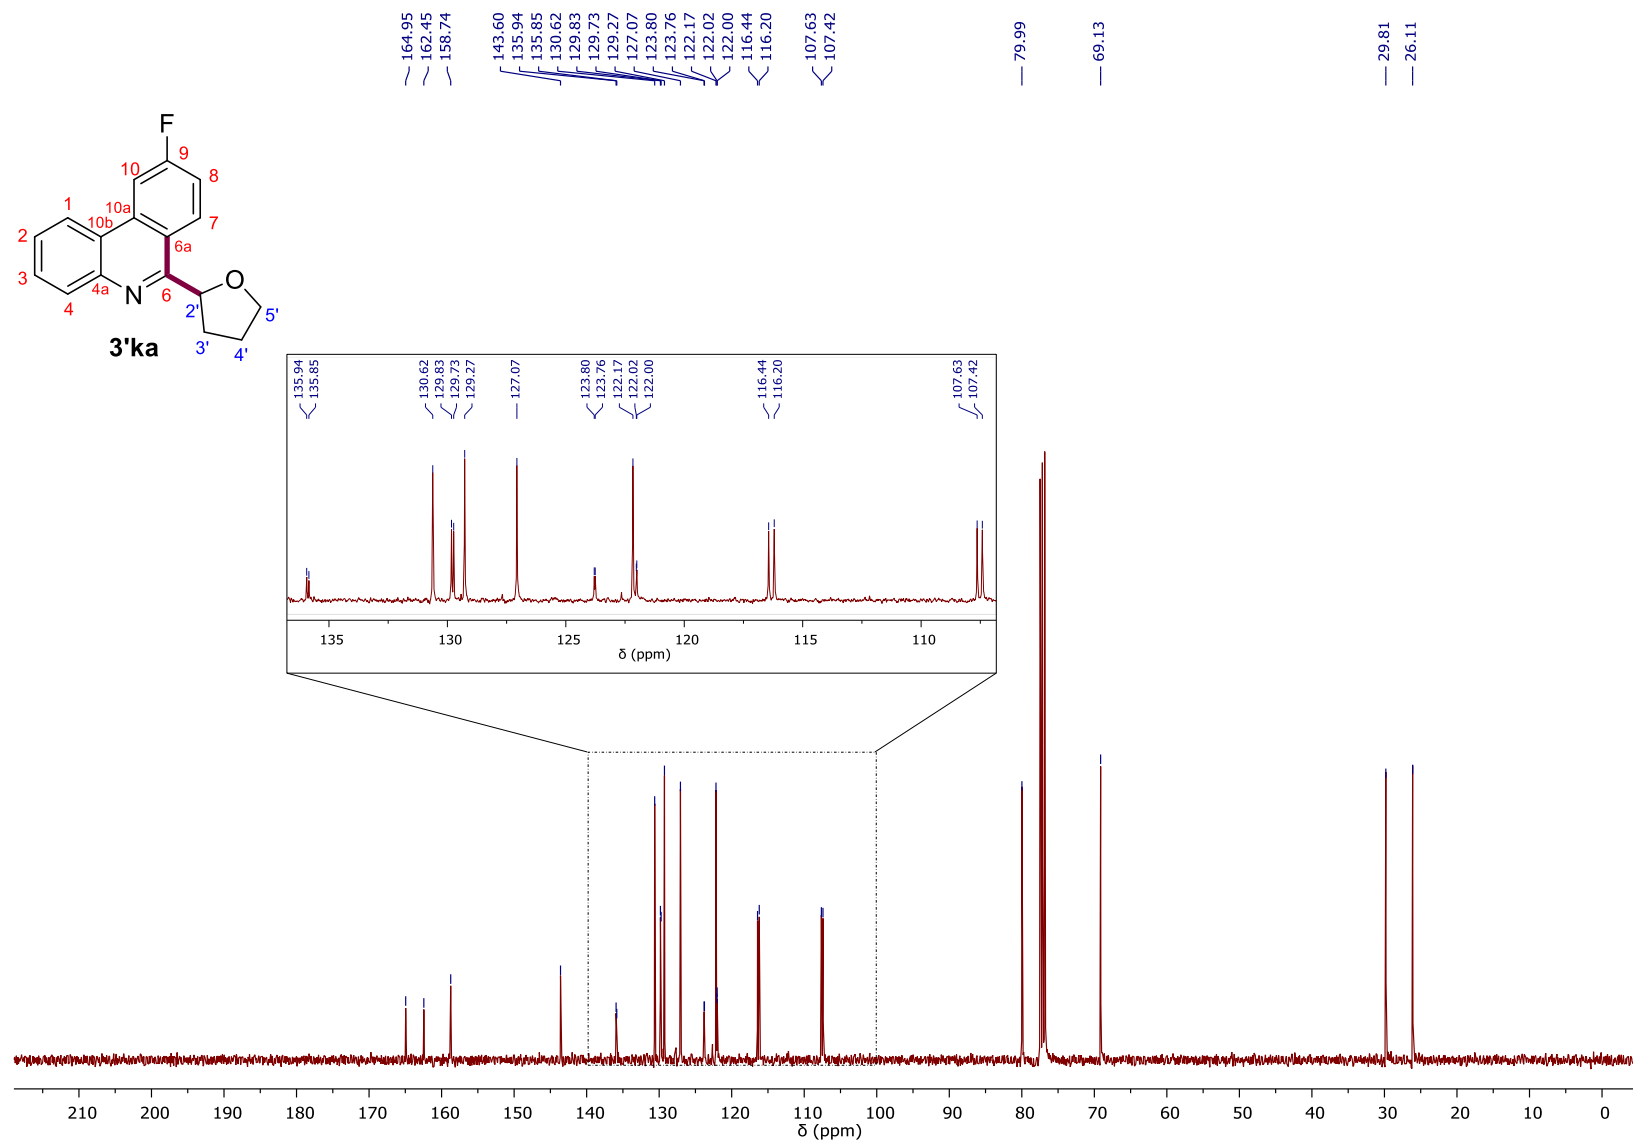

Differential nOe when H-2' is irradiated (300 MHz, CDCl<sub>3</sub>)

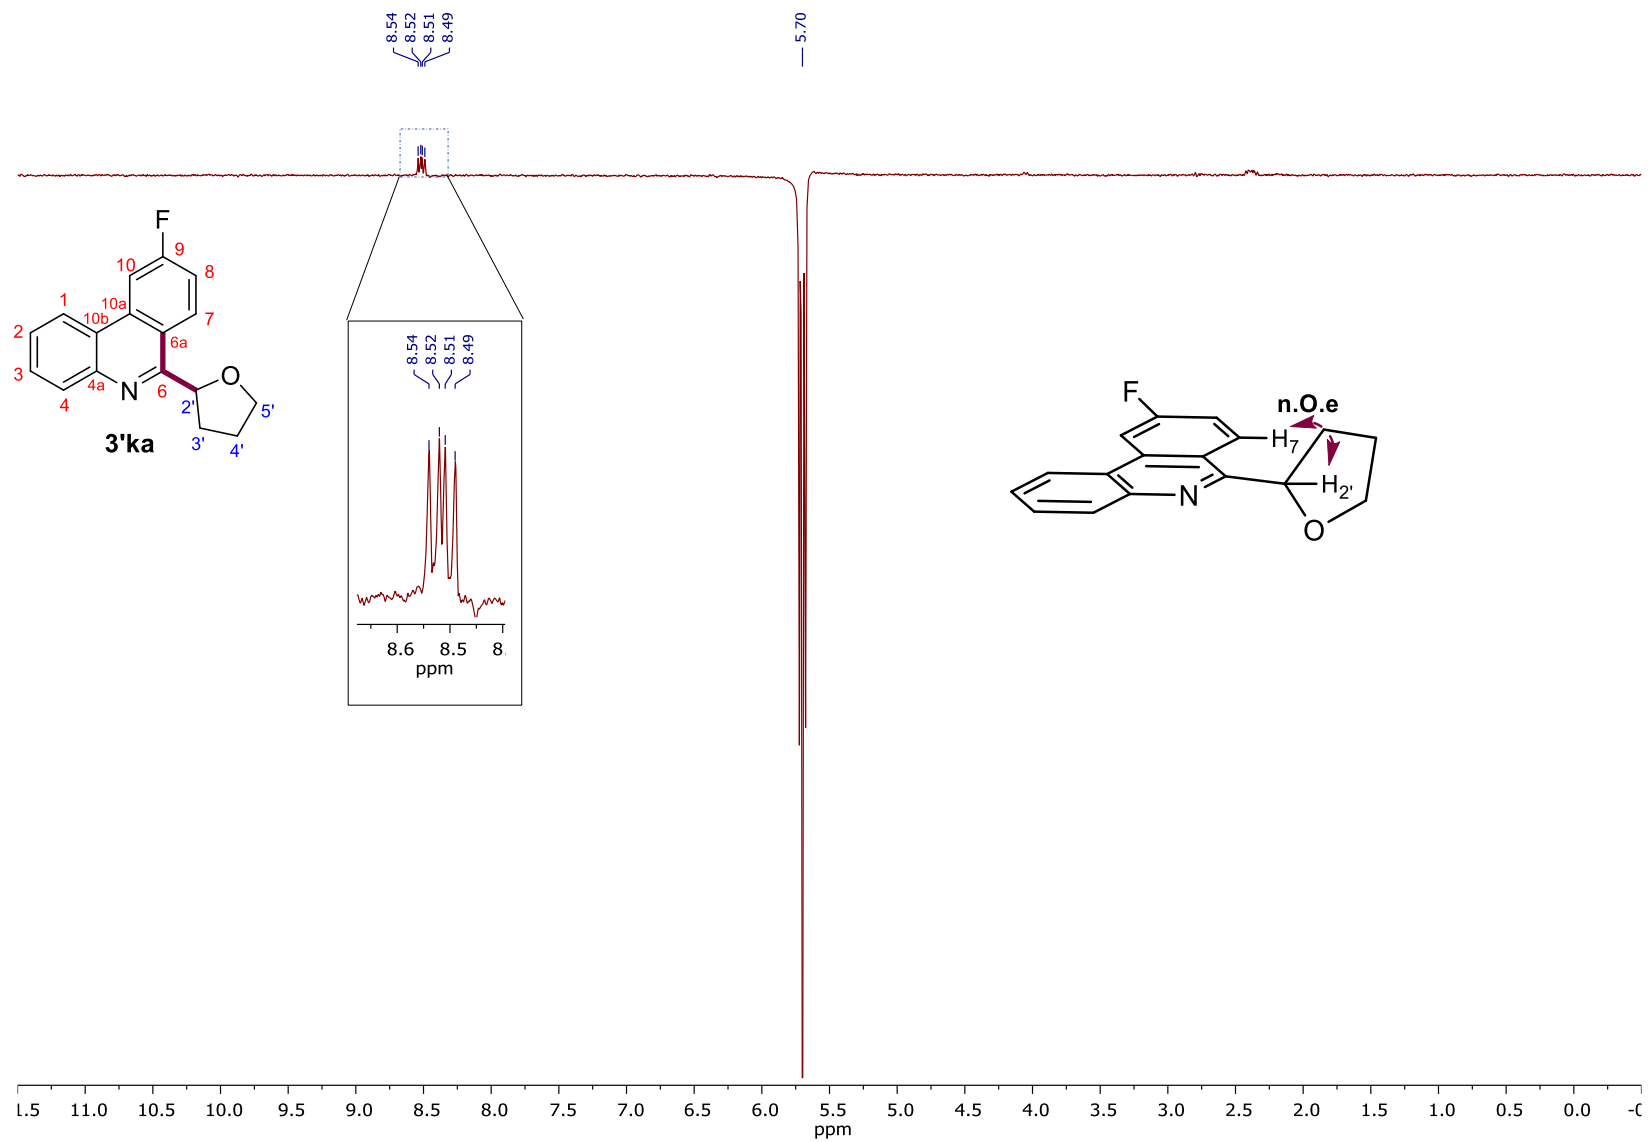

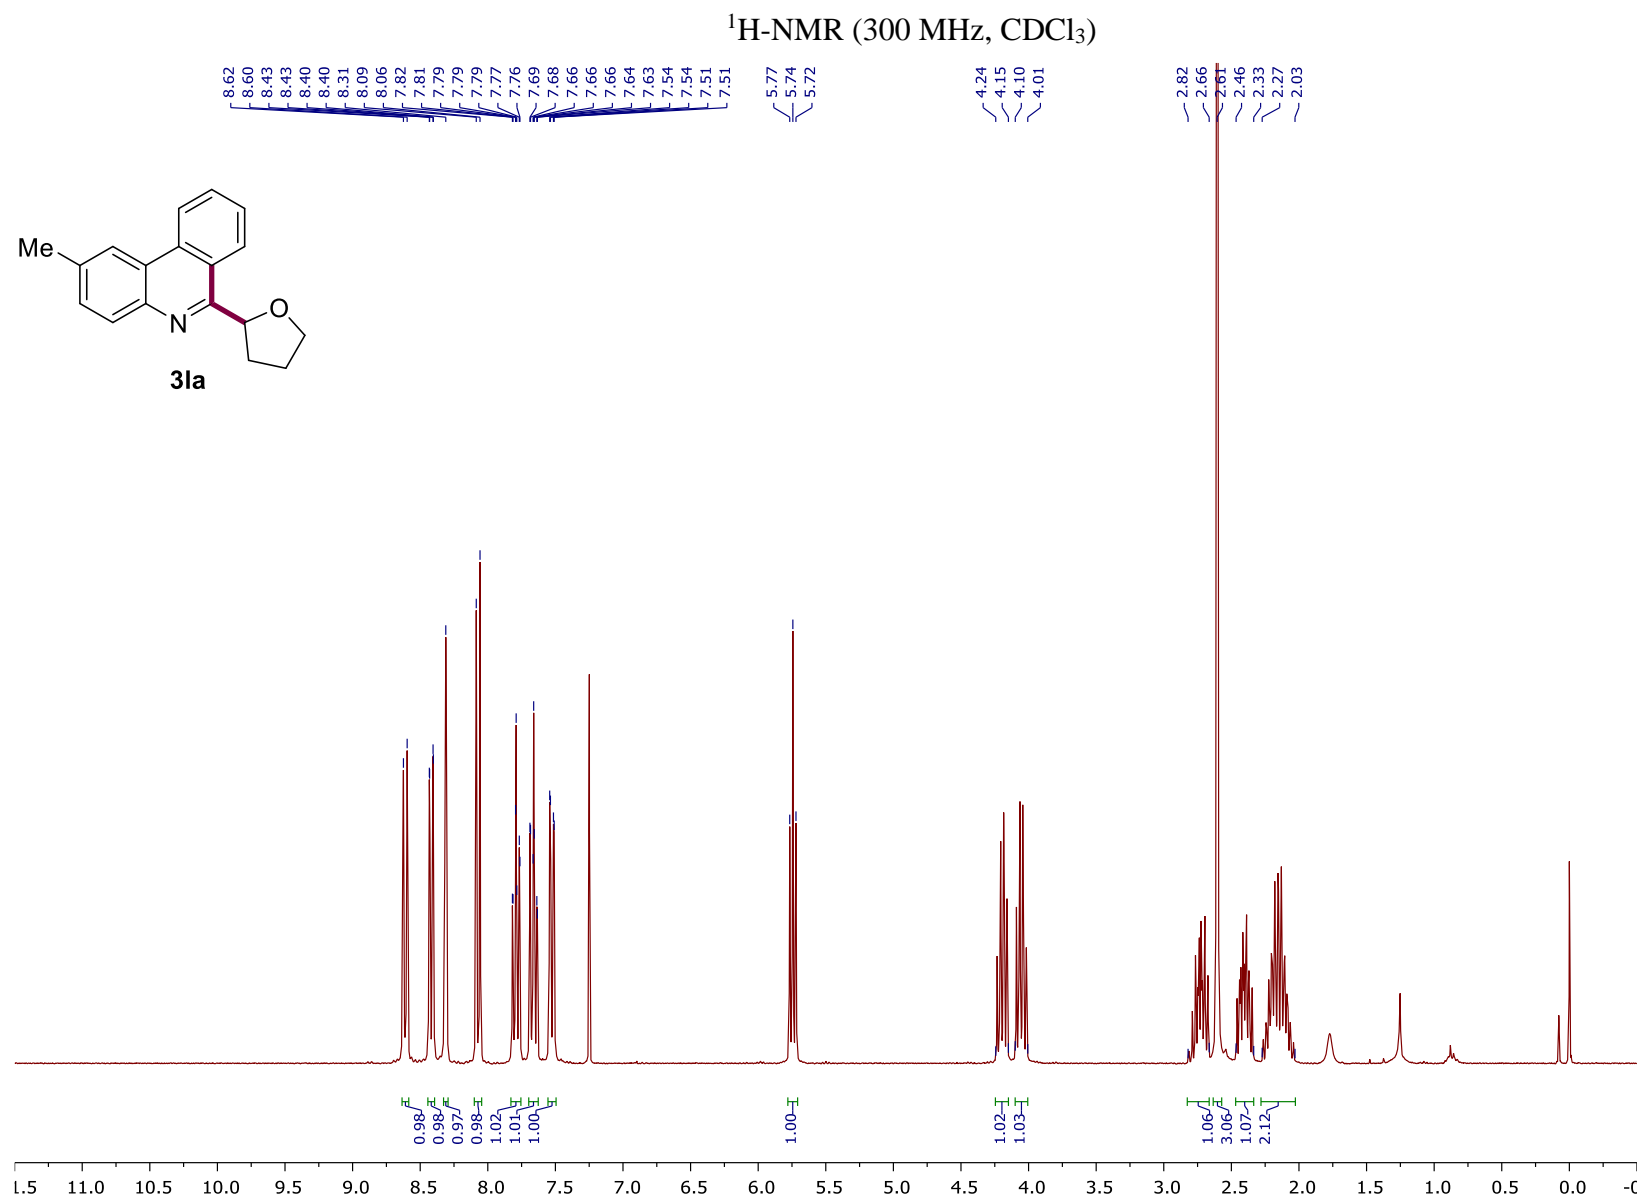

$^{13}\text{C}$ -NMR (101 MHz,  $\text{CDCl}_3$ )

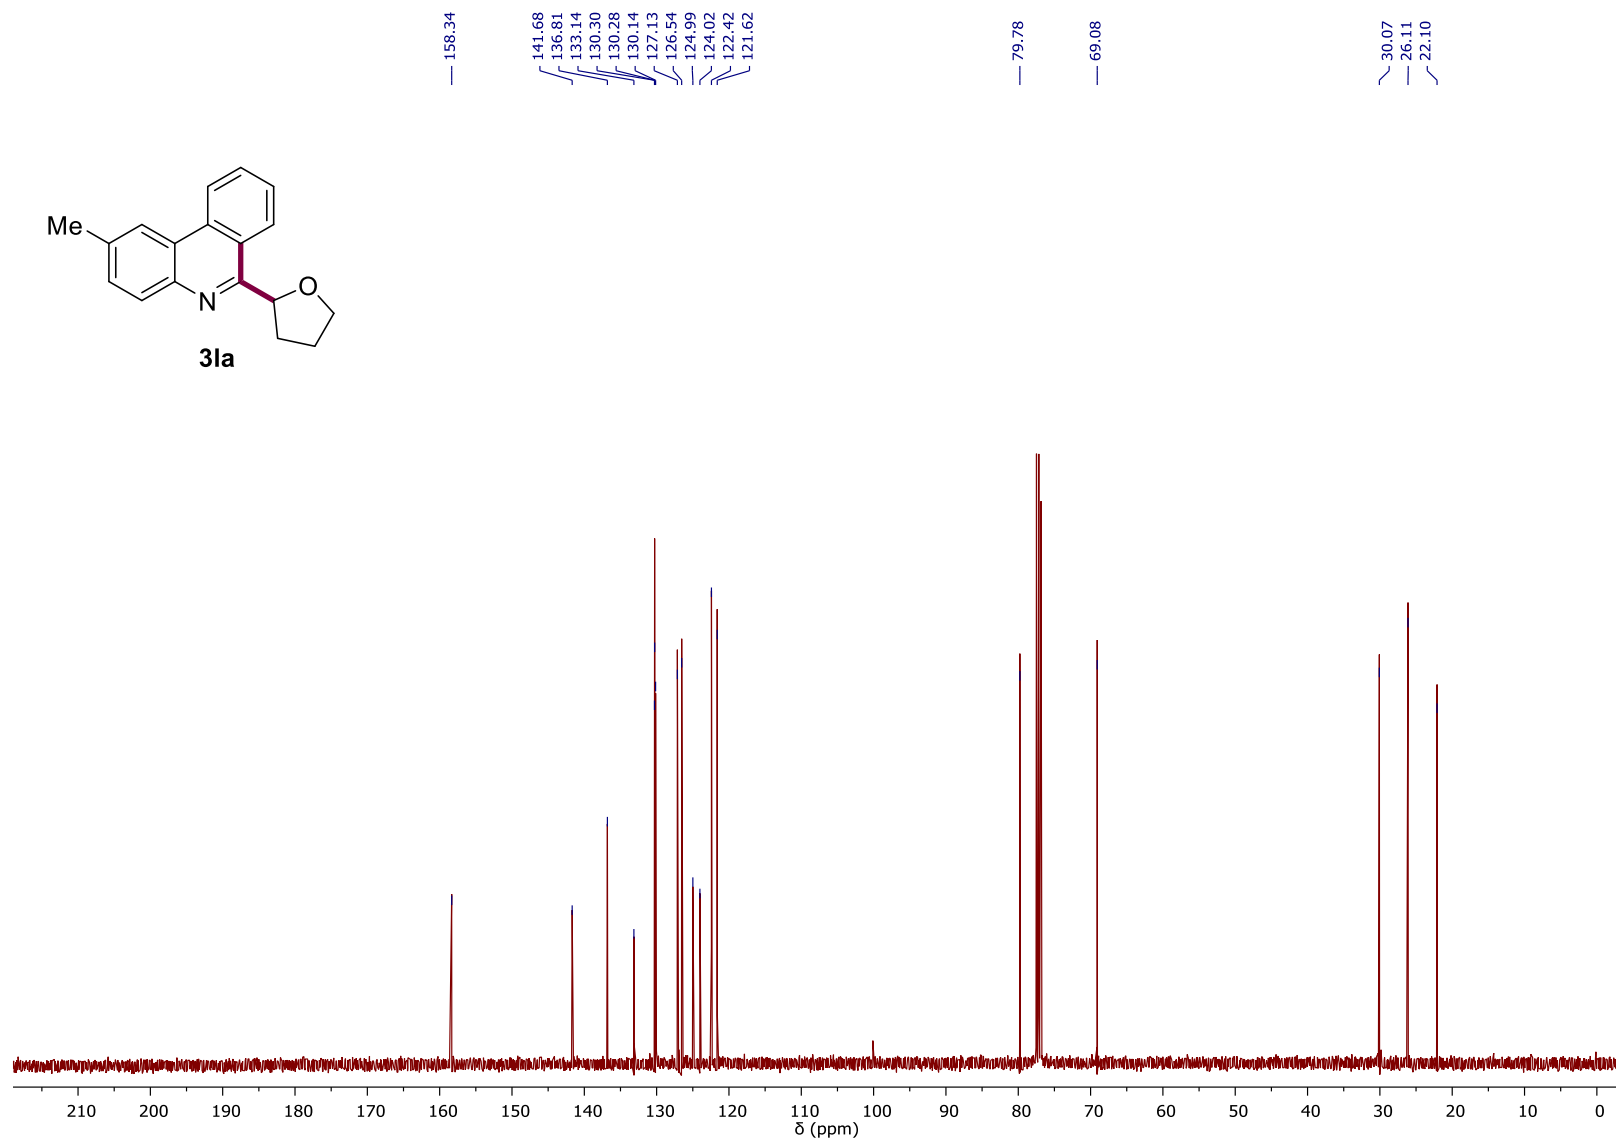

$^1\text{H-NMR}$  (400 MHz,  $\text{CDCl}_3$ )

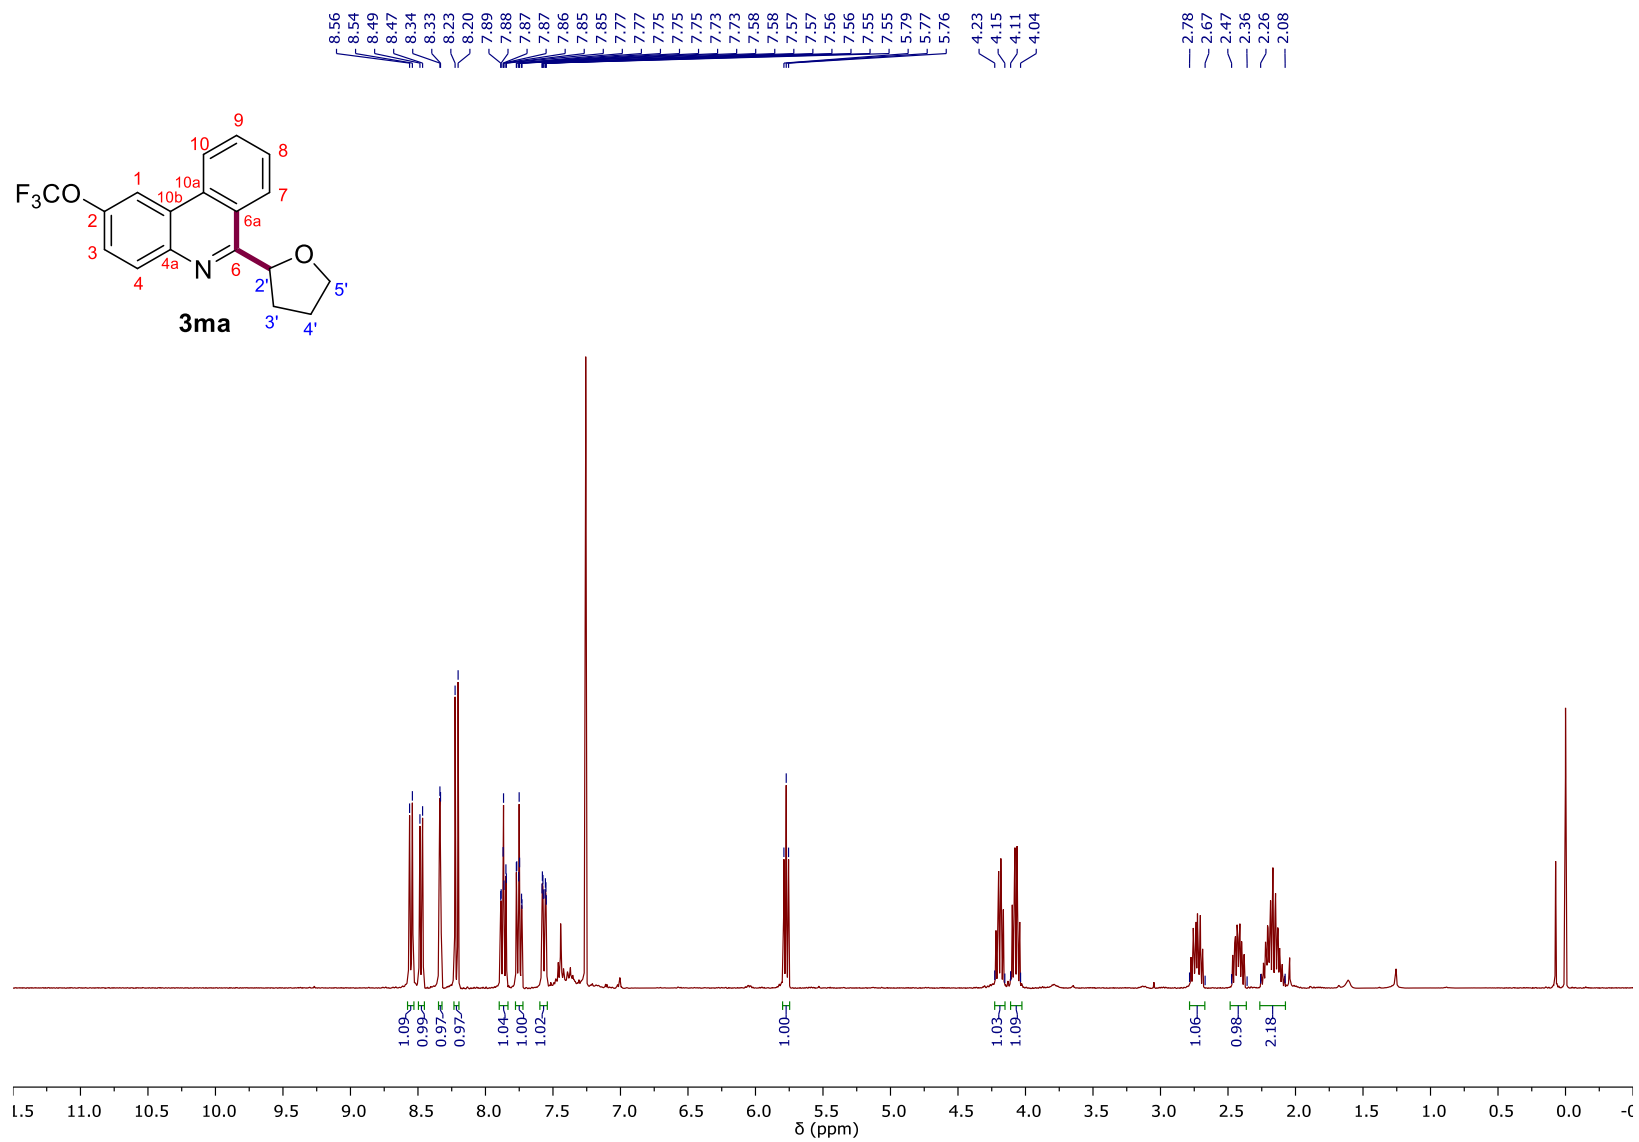

$^{13}\text{C}$ -NMR (101 MHz,  $\text{CDCl}_3$ )

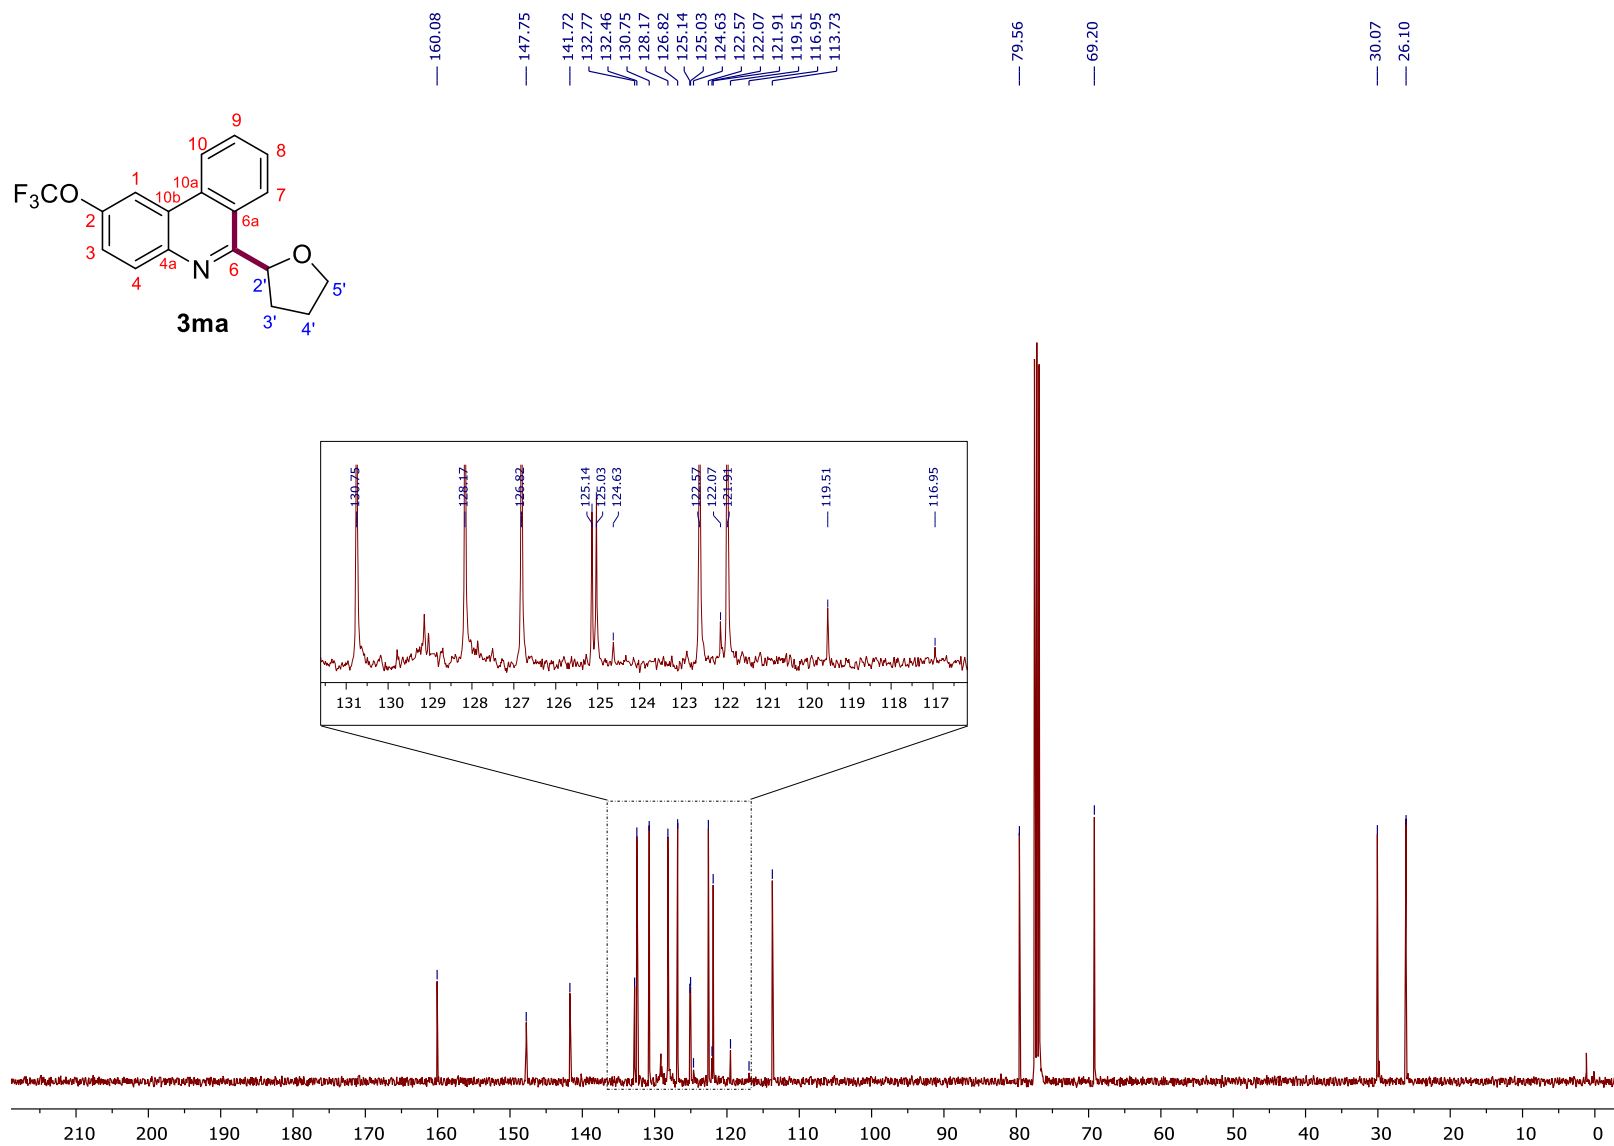



<sup>1</sup>H-NMR (300 MHz, CDCl<sub>3</sub>)

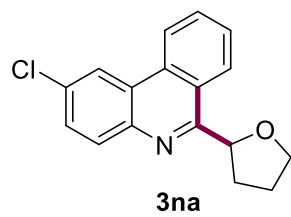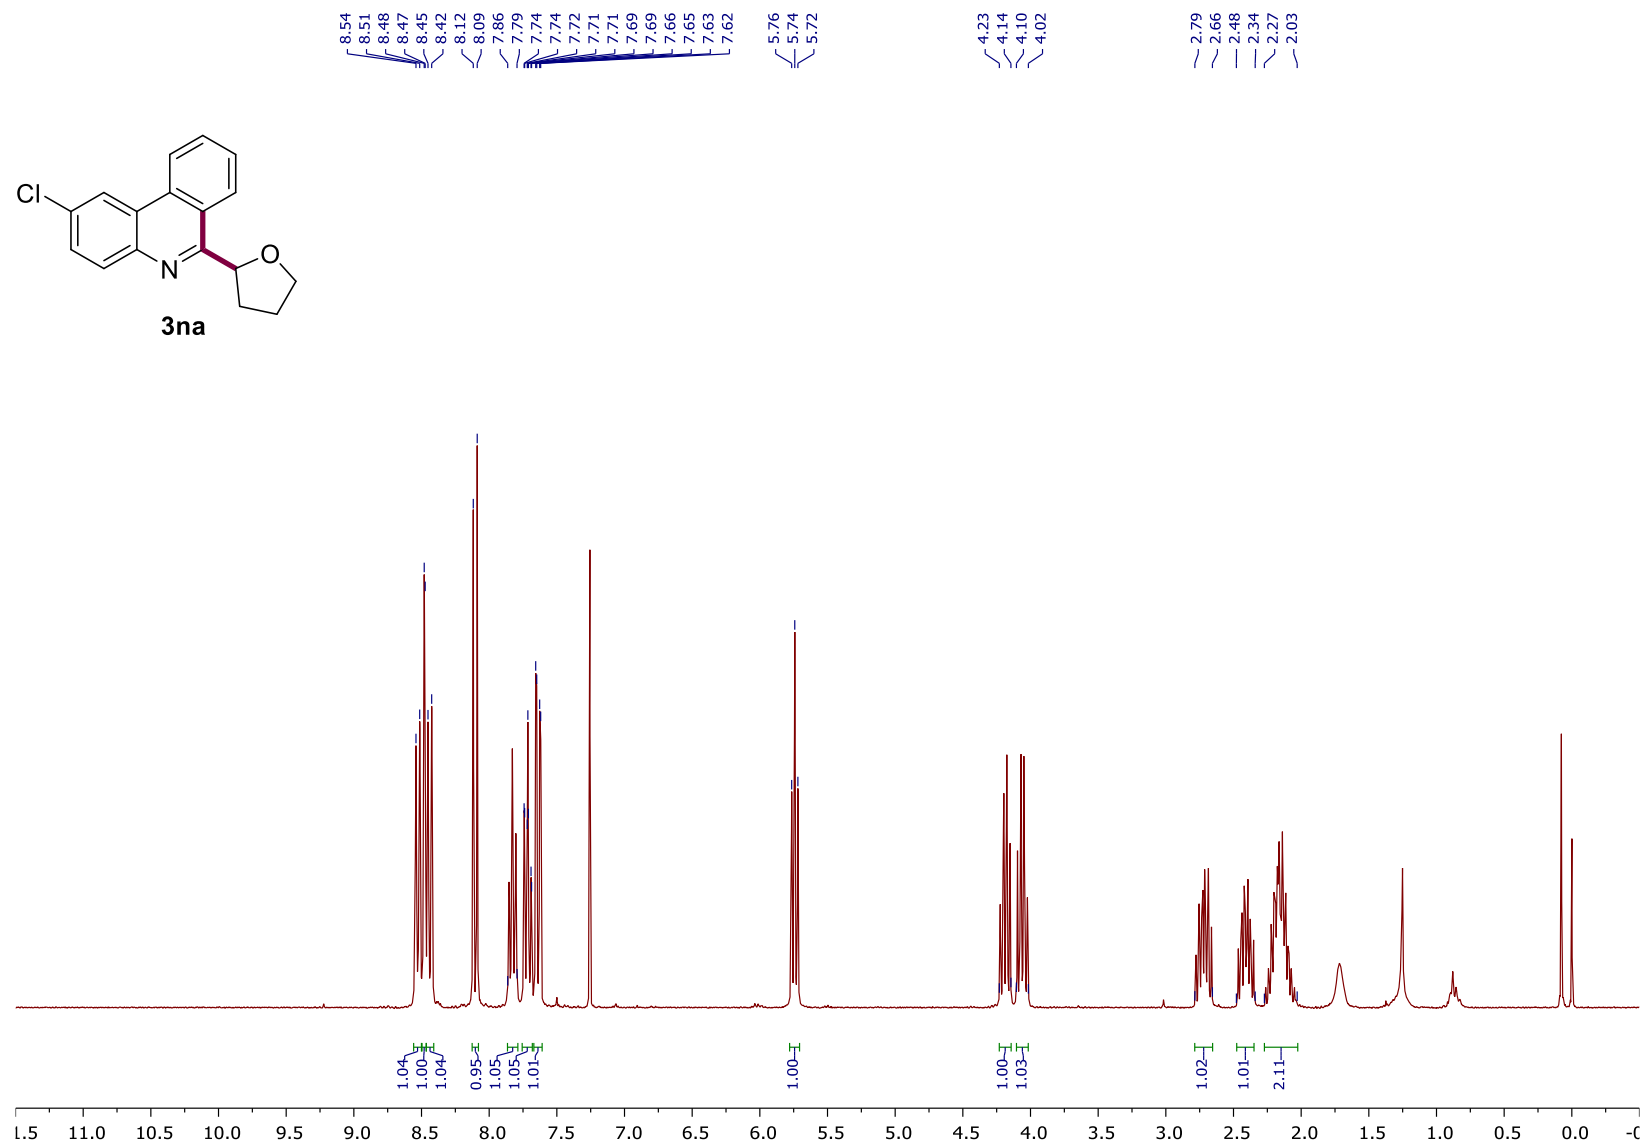

$^{13}\text{C}$ -NMR (101 MHz,  $\text{CDCl}_3$ )

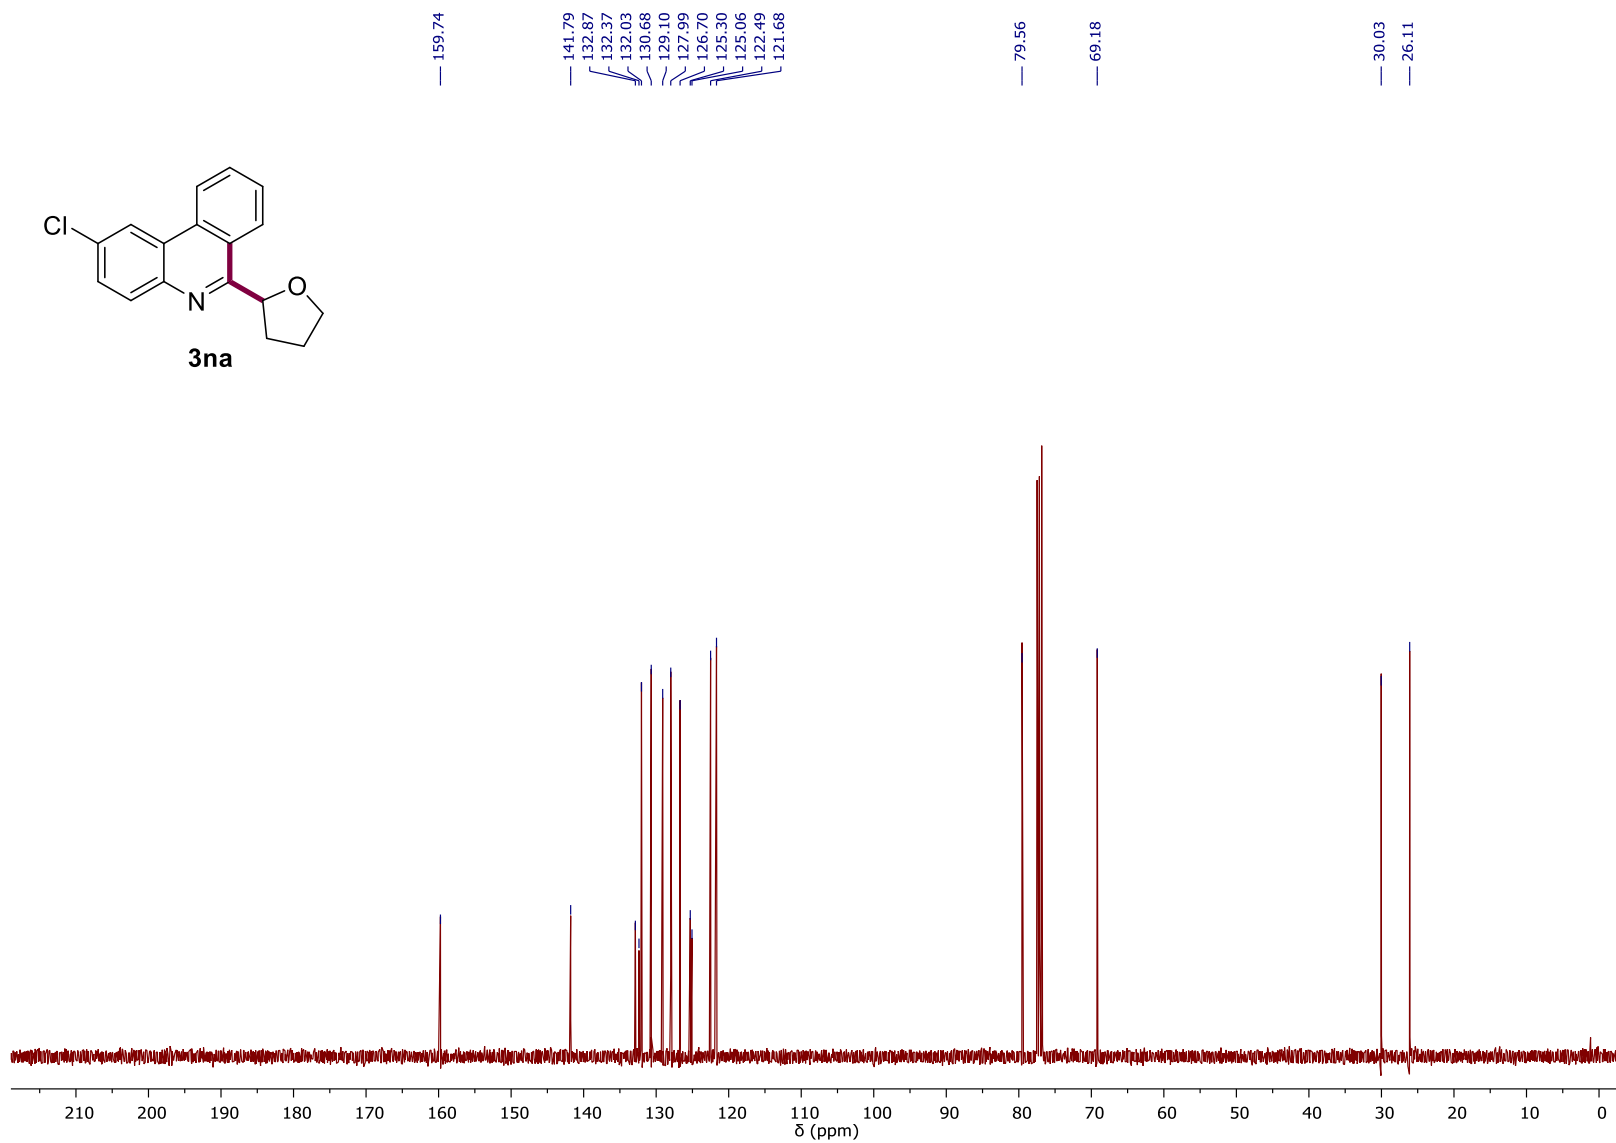

<sup>1</sup>H-NMR (300 MHz, CDCl<sub>3</sub>)

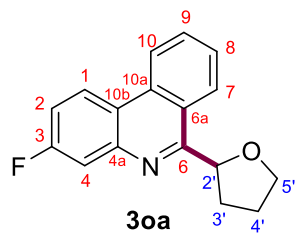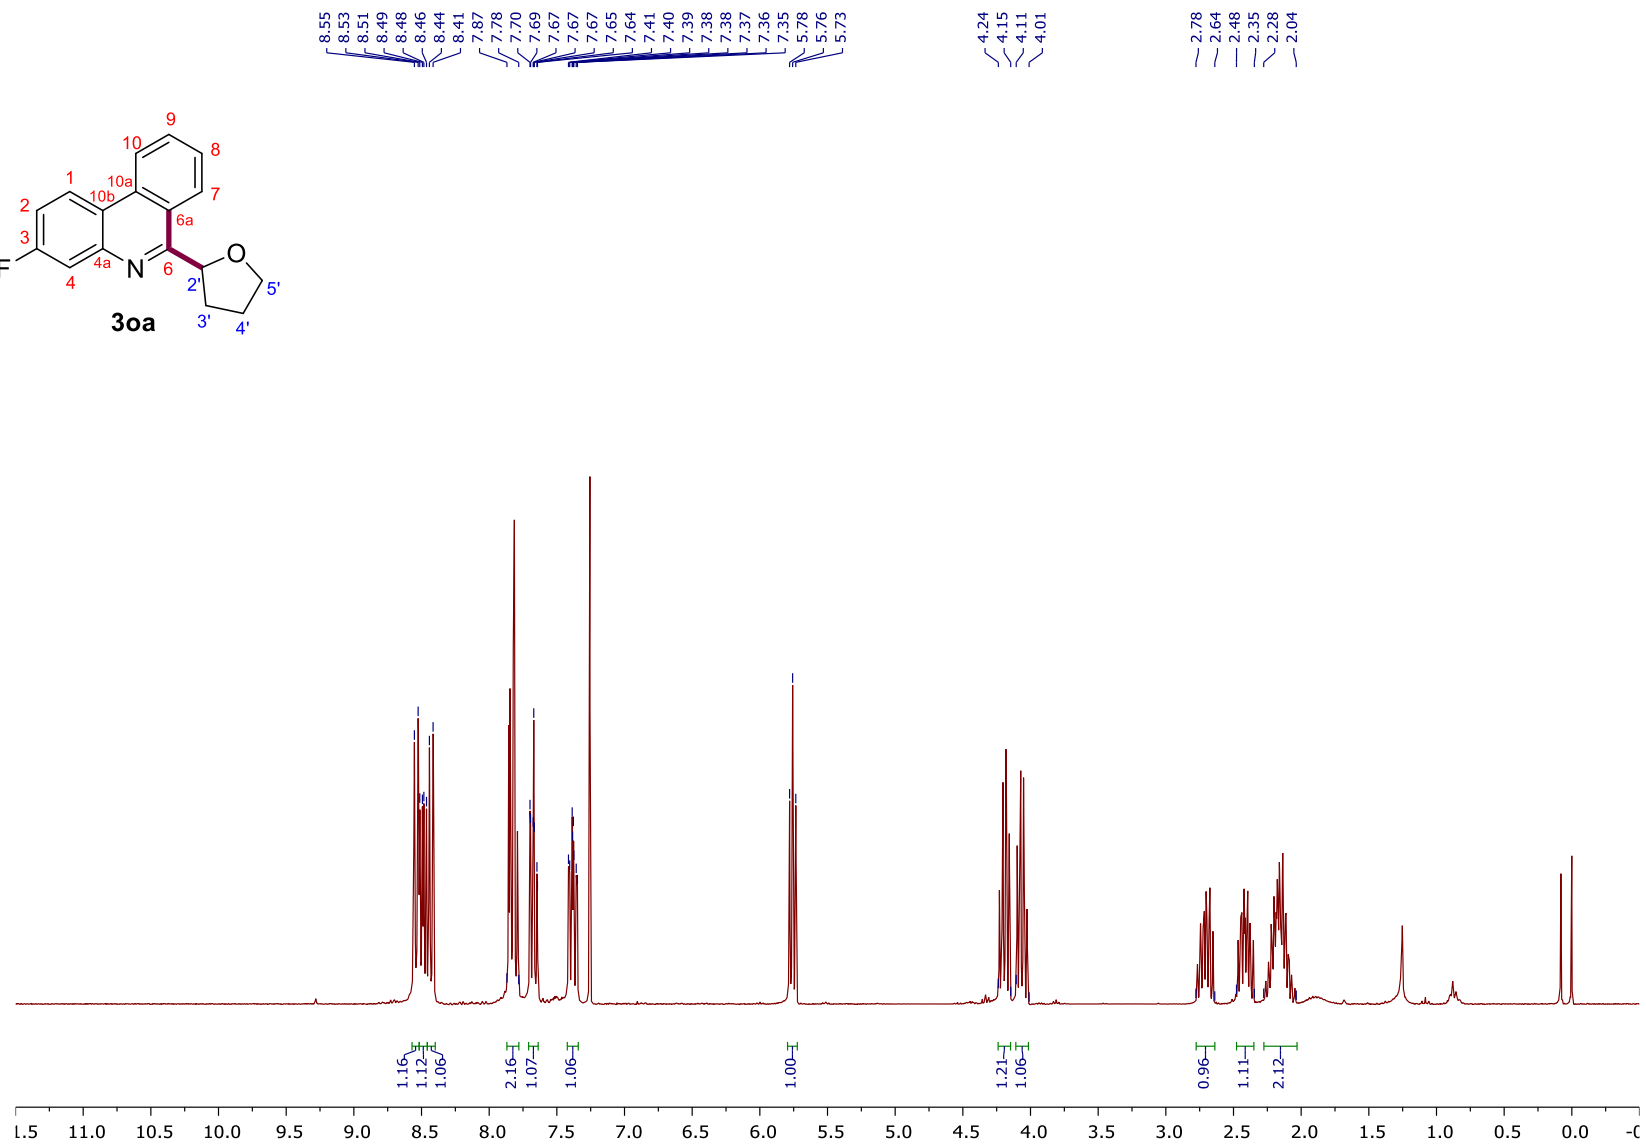

$^{13}\text{C}$ -NMR (101 MHz,  $\text{CDCl}_3$ )

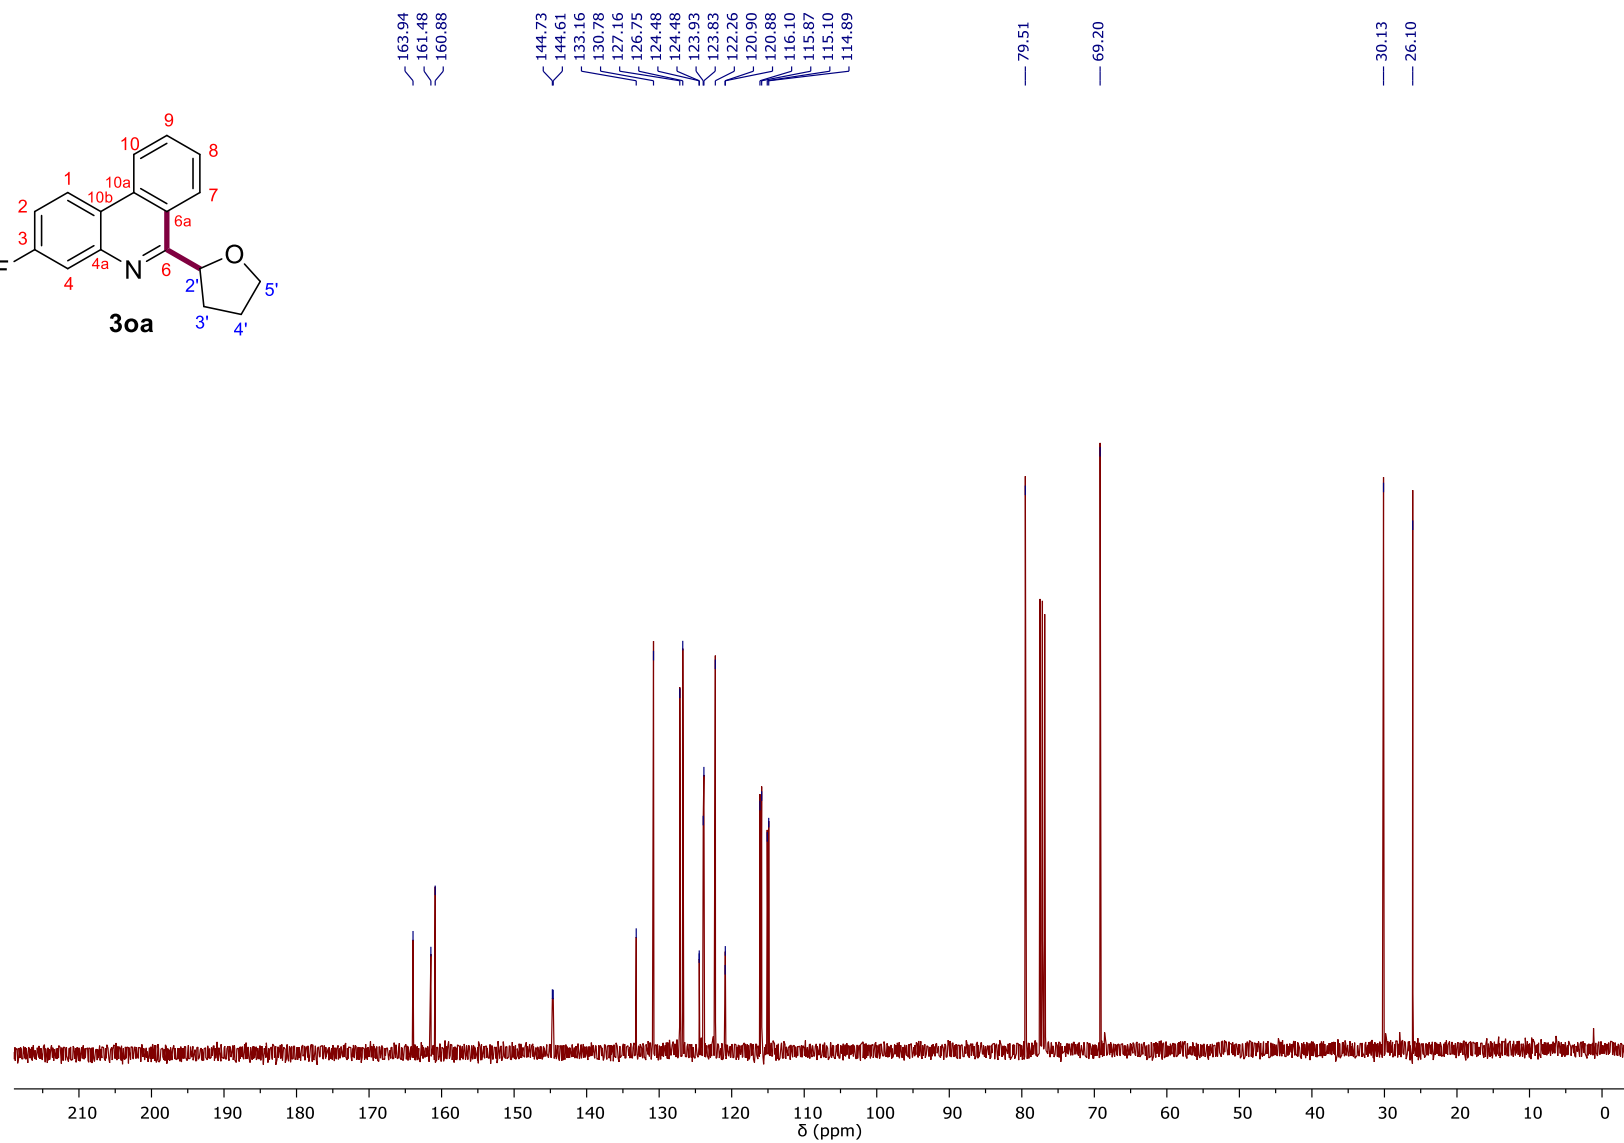

<sup>1</sup>H-NMR (300 MHz, CDCl<sub>3</sub>)

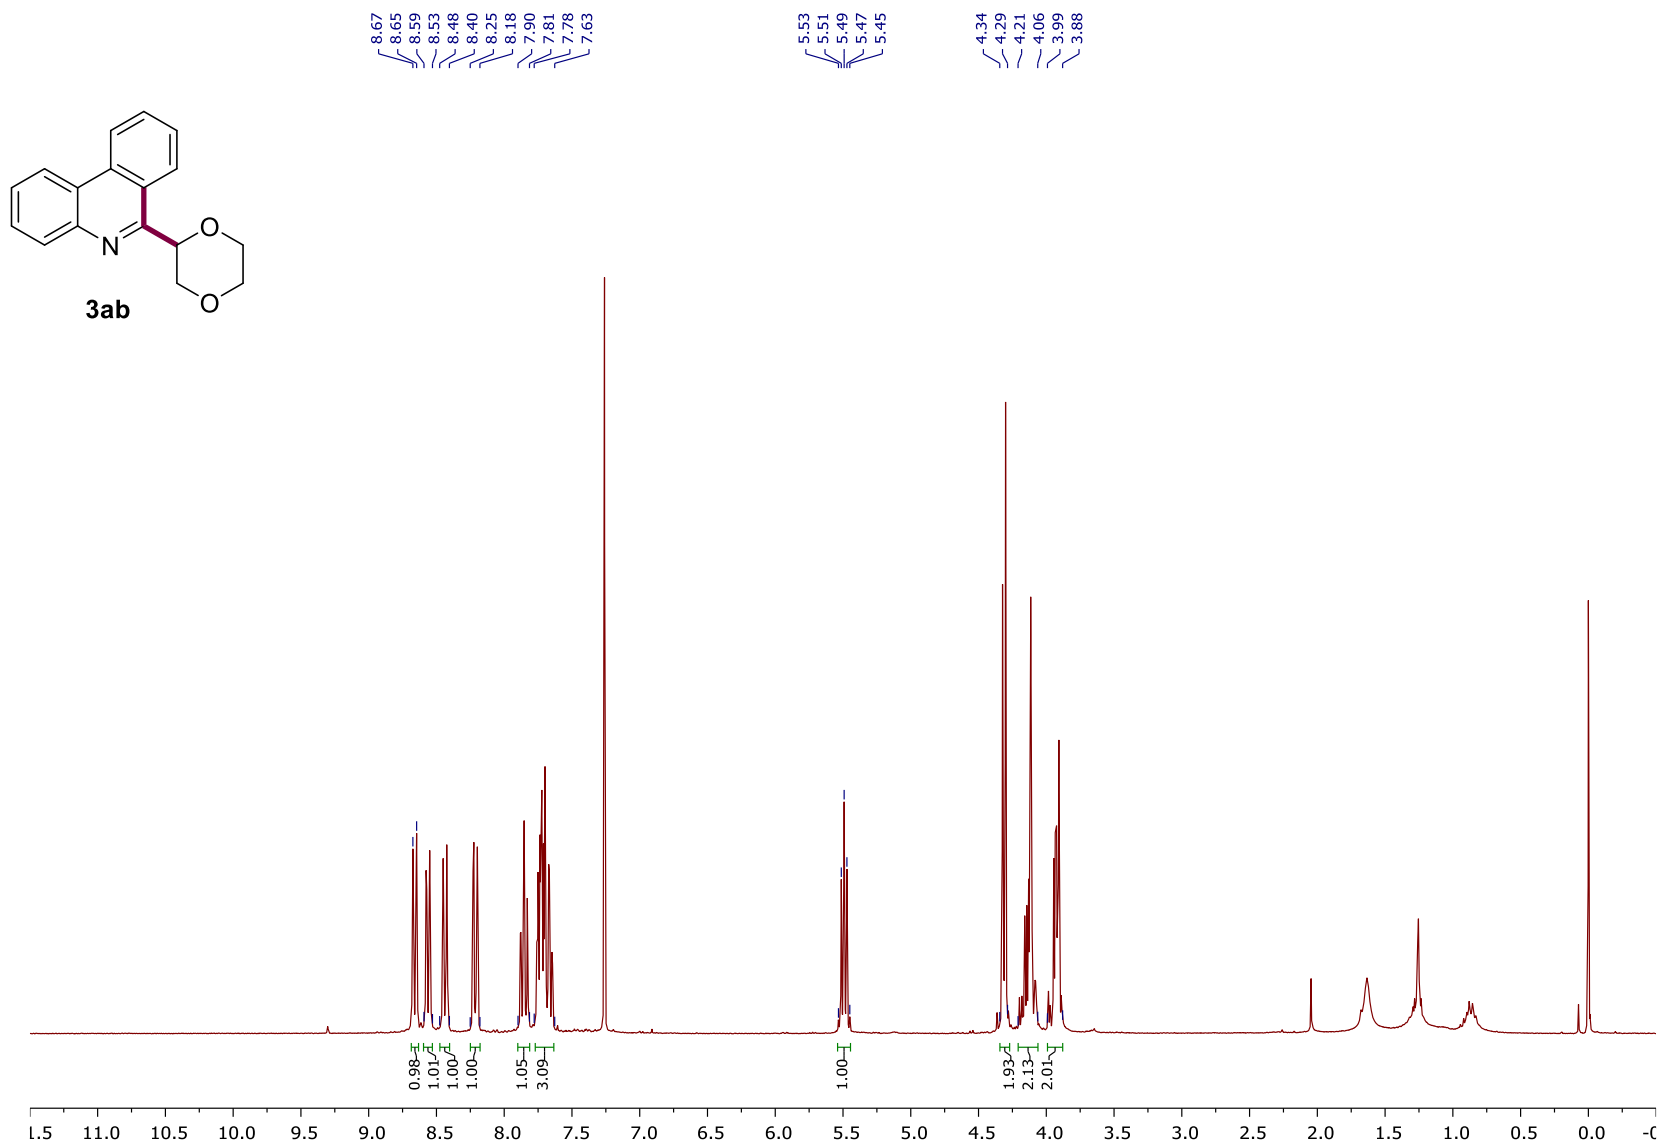

$^{13}\text{C}$ -NMR (75 MHz,  $\text{CDCl}_3$ )

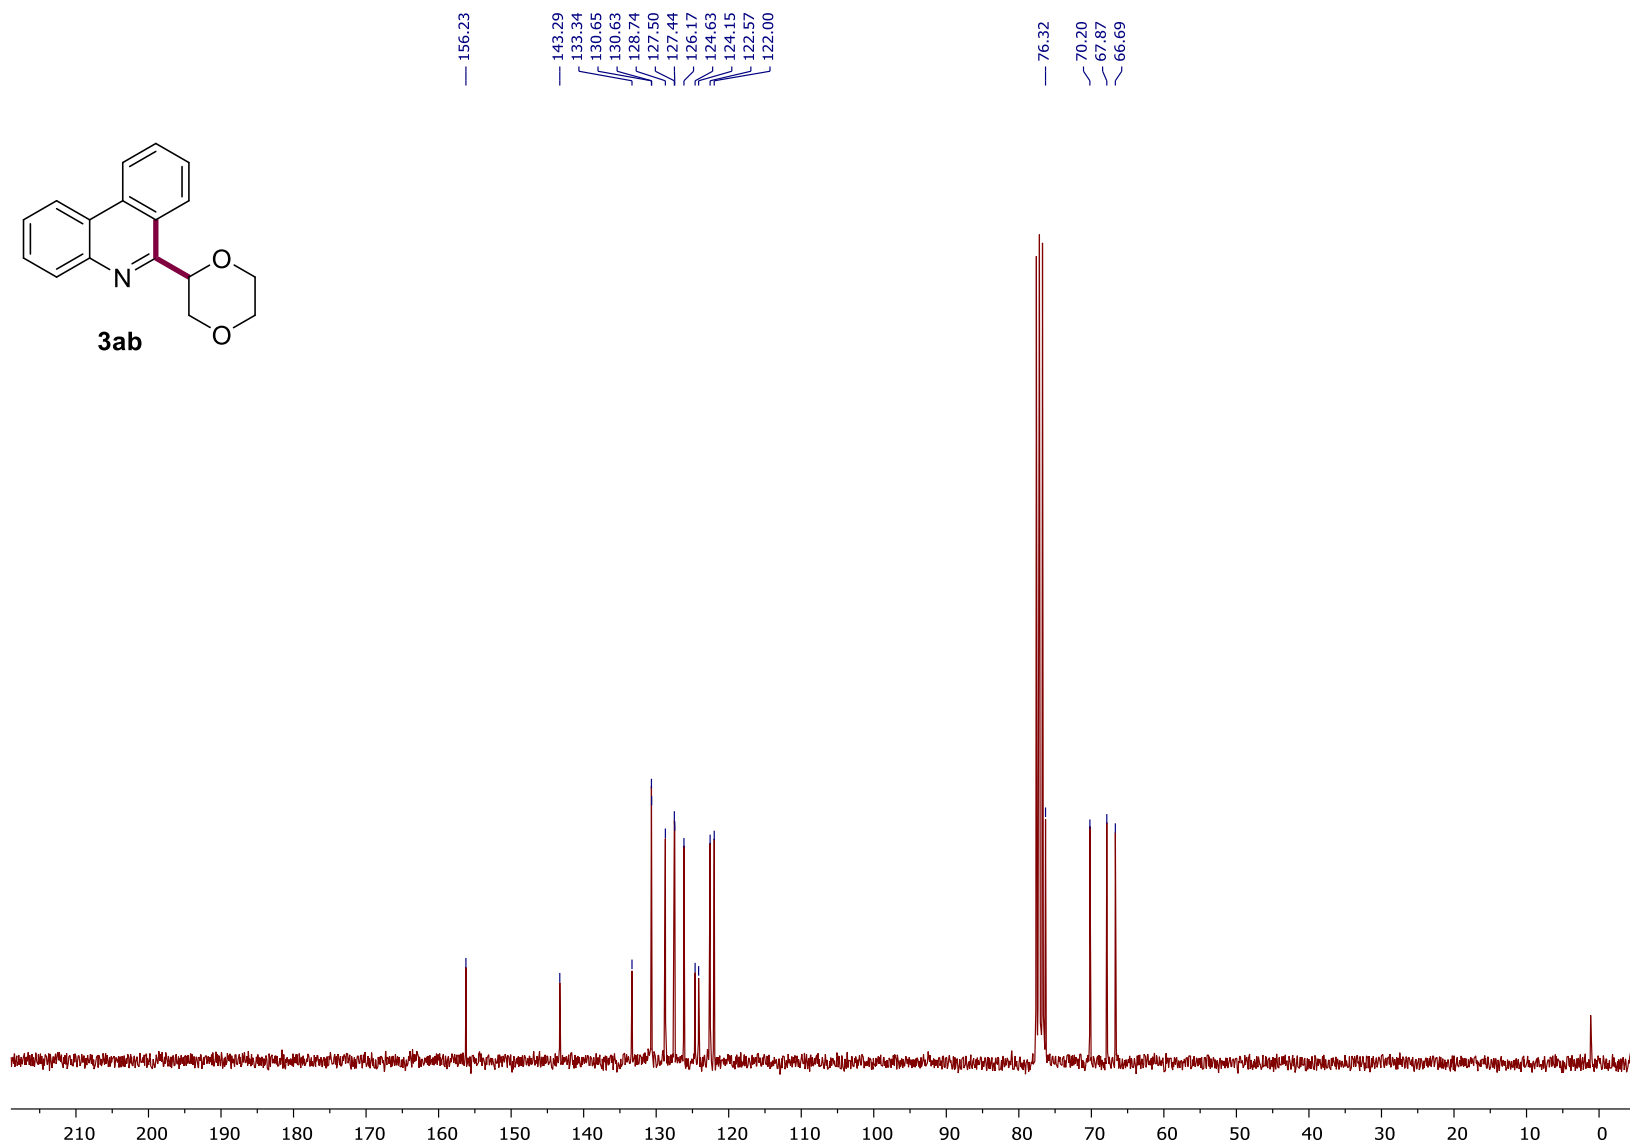

<sup>1</sup>H-NMR (300 MHz, CDCl<sub>3</sub>)

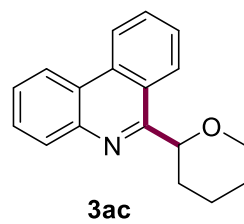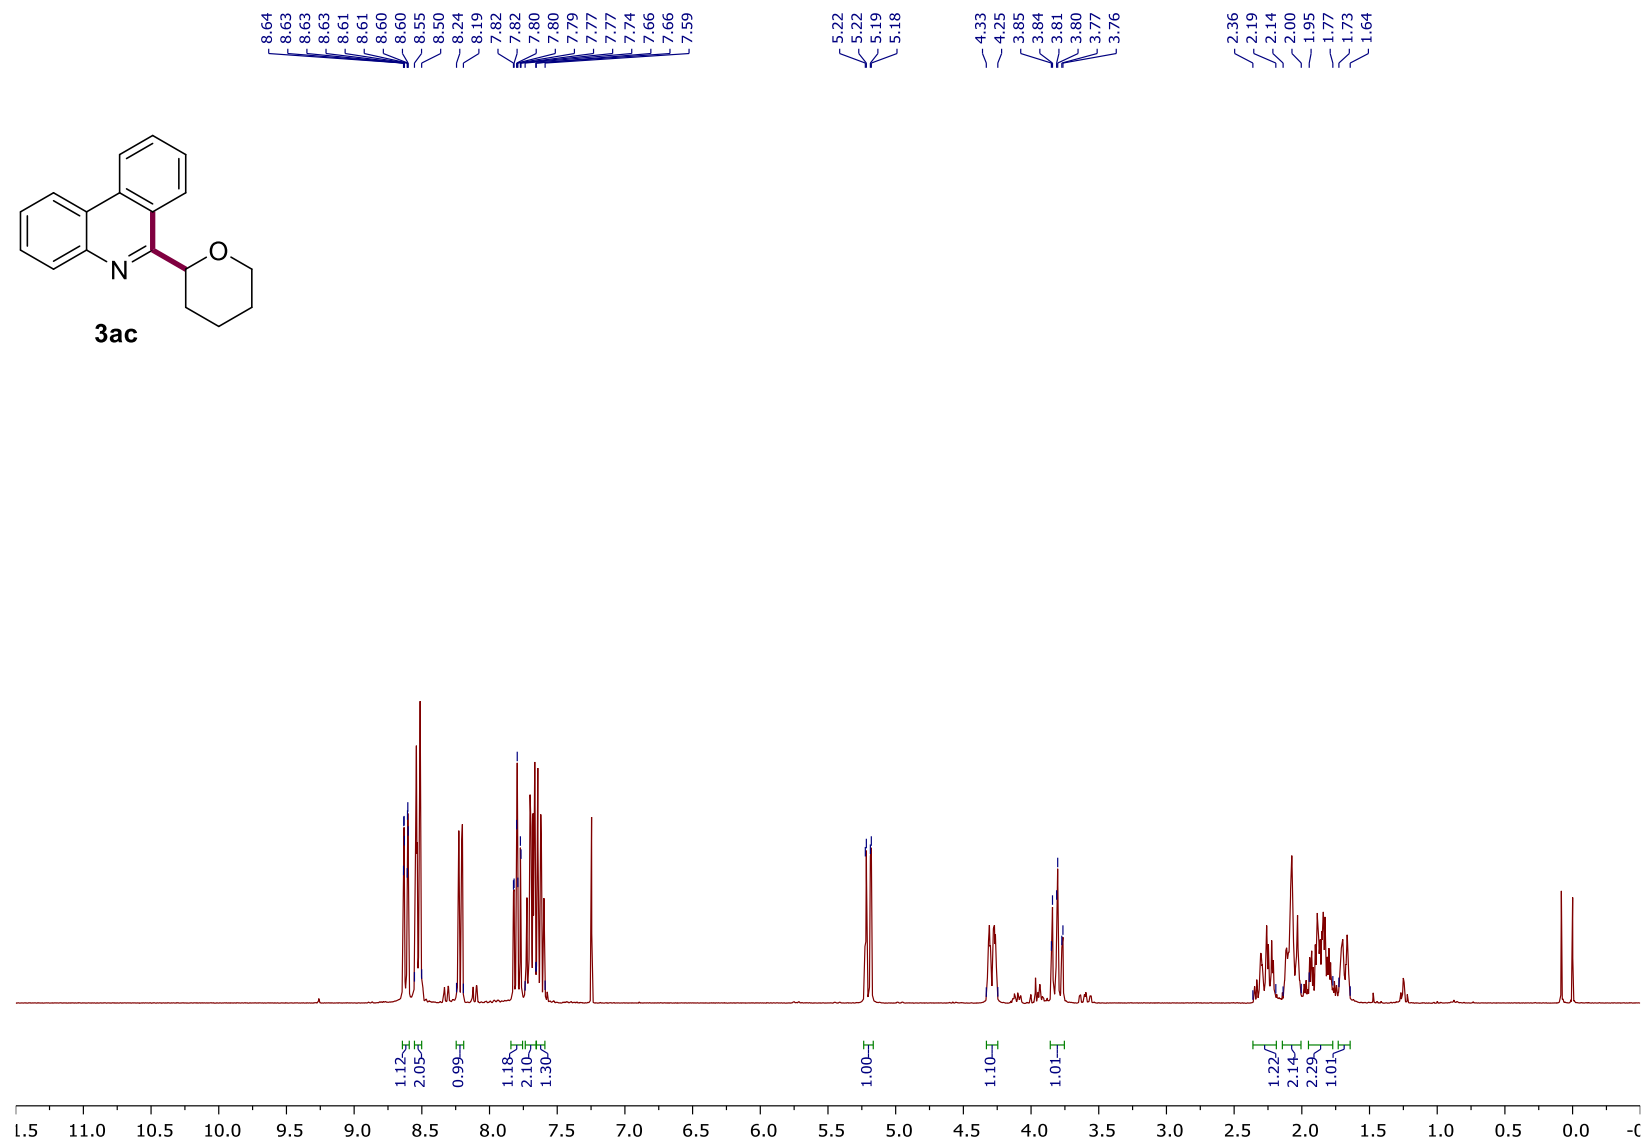

$^{13}\text{C}$ -NMR (75 MHz,  $\text{CDCl}_3$ )

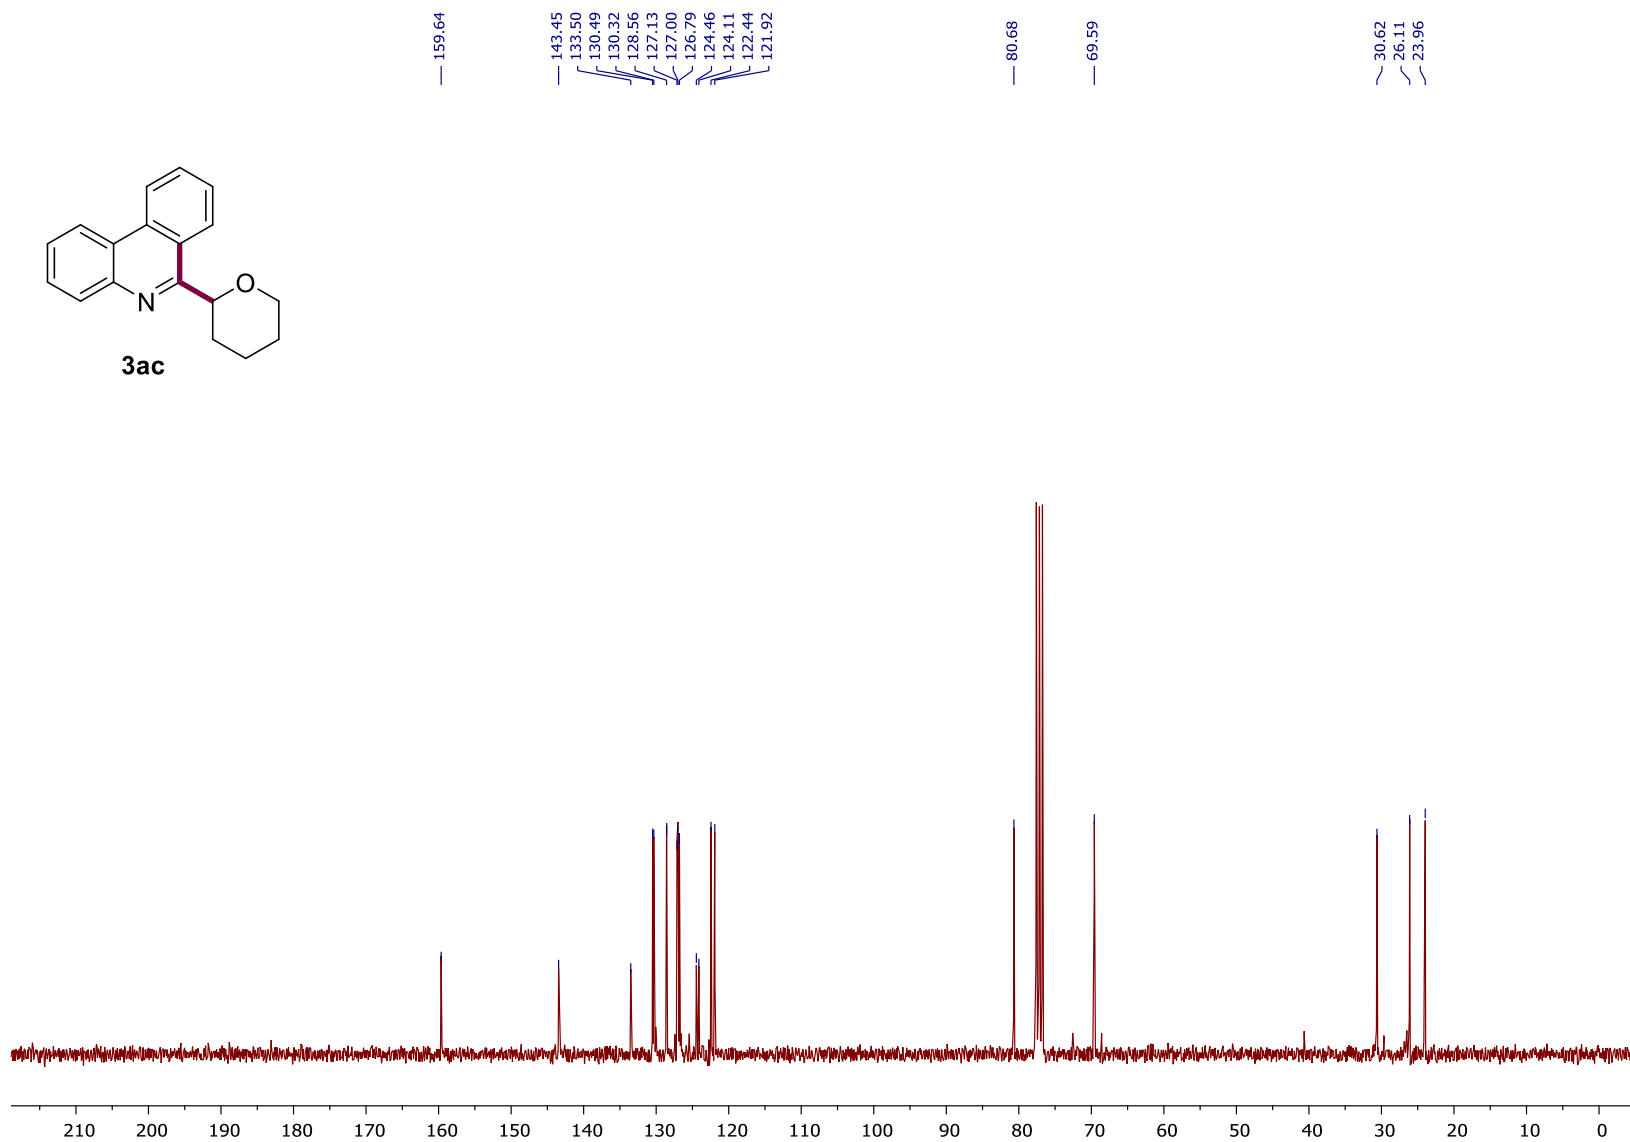



$^1\text{H}$ -NMR (300 MHz,  $\text{CDCl}_3$ )

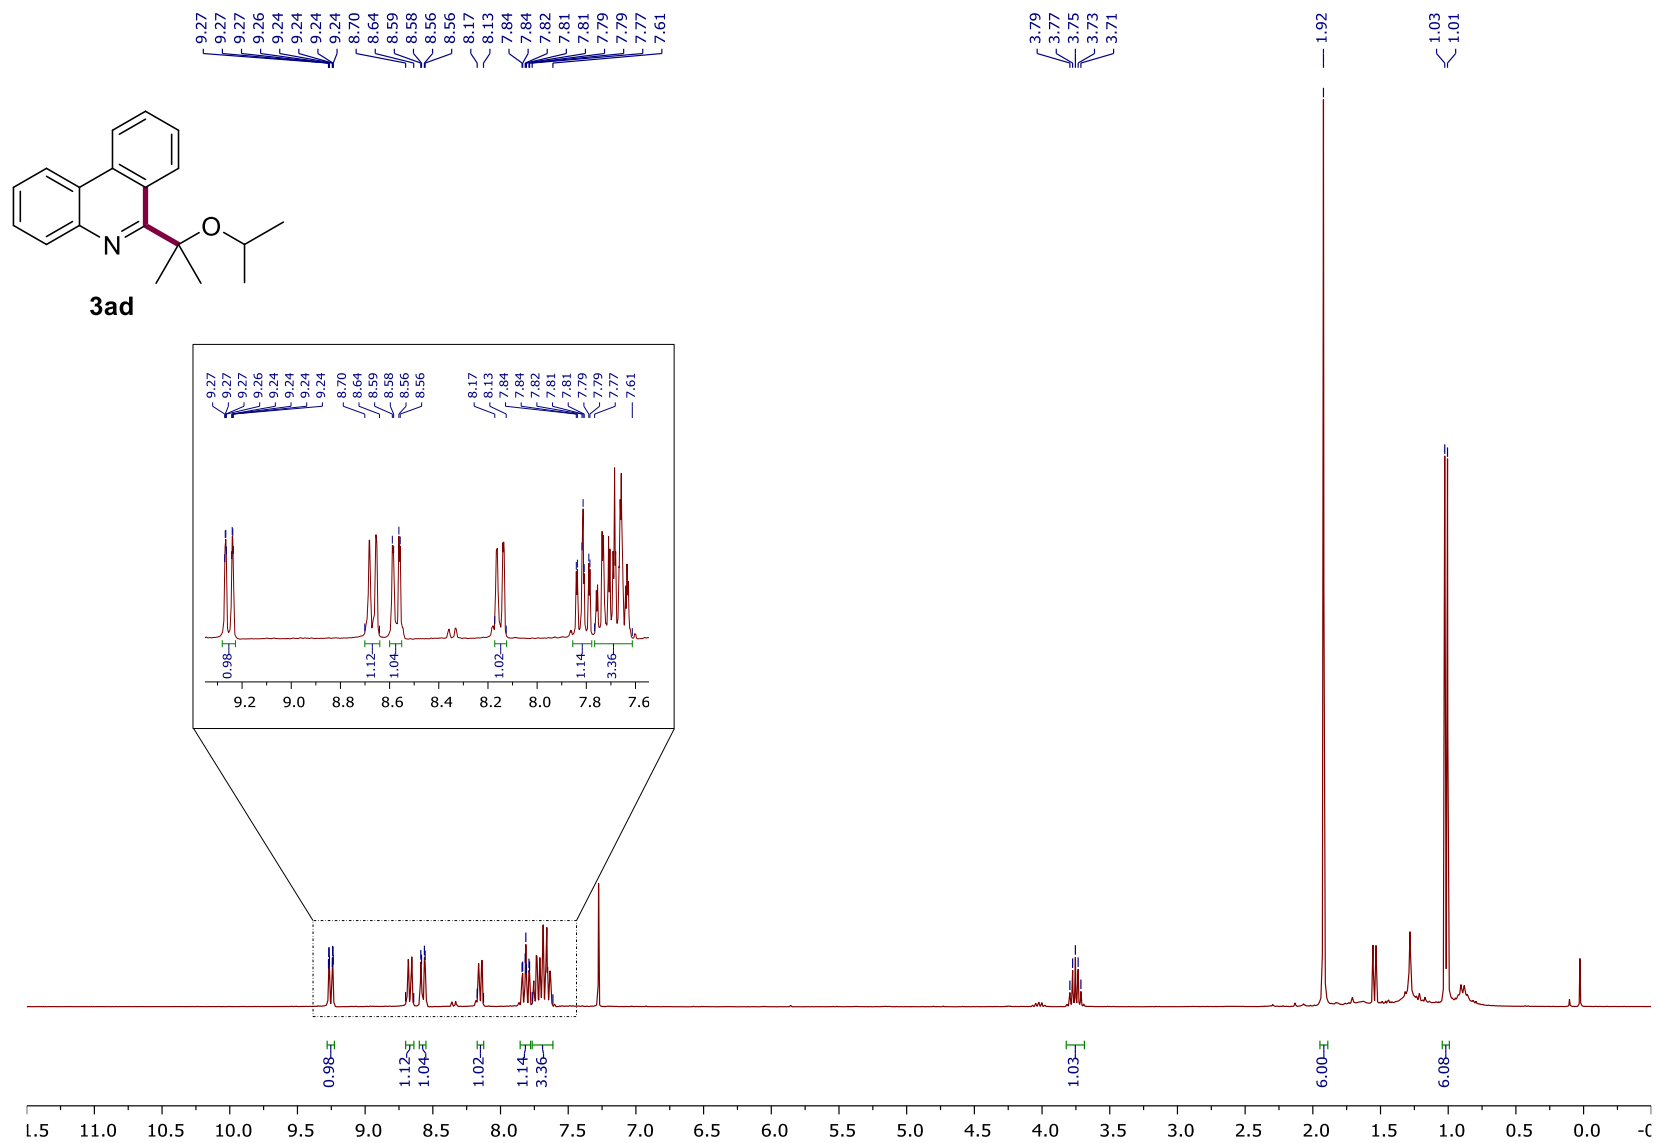

$^{13}\text{C}$ -NMR (101 MHz,  $\text{CDCl}_3$ )

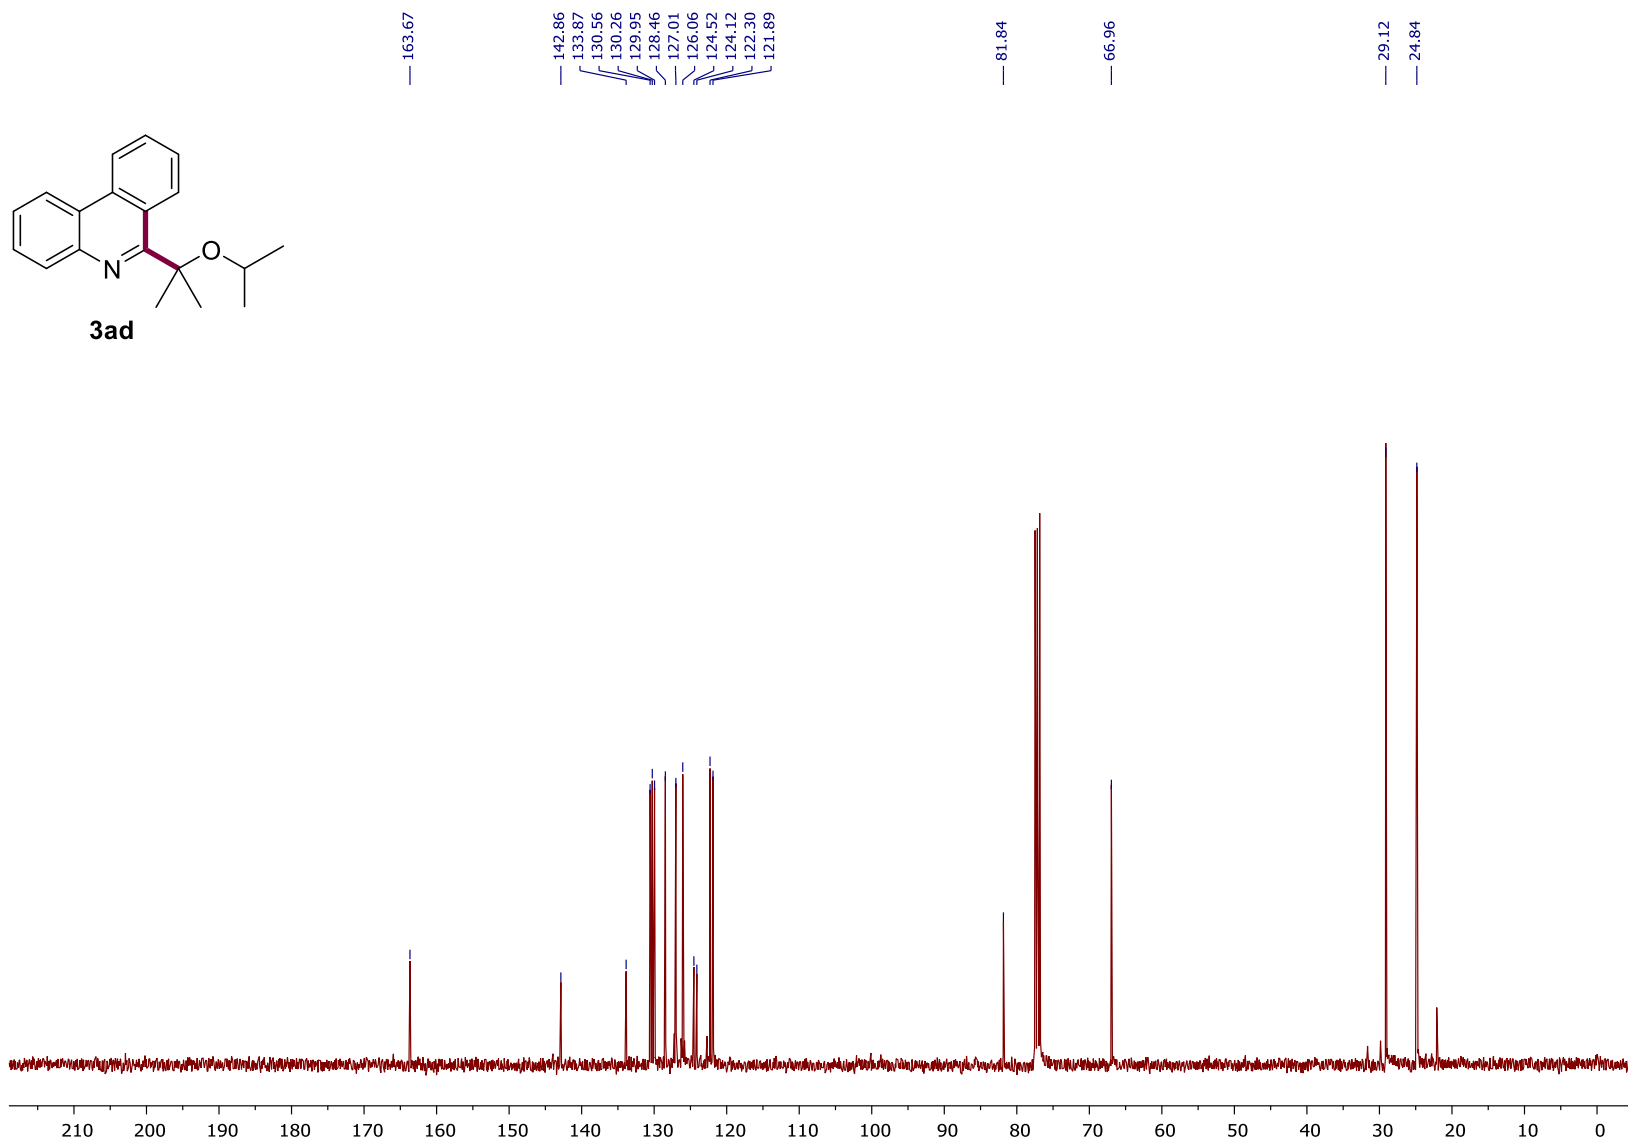

$^1\text{H}$ -NMR (300 MHz,  $\text{CDCl}_3$ )

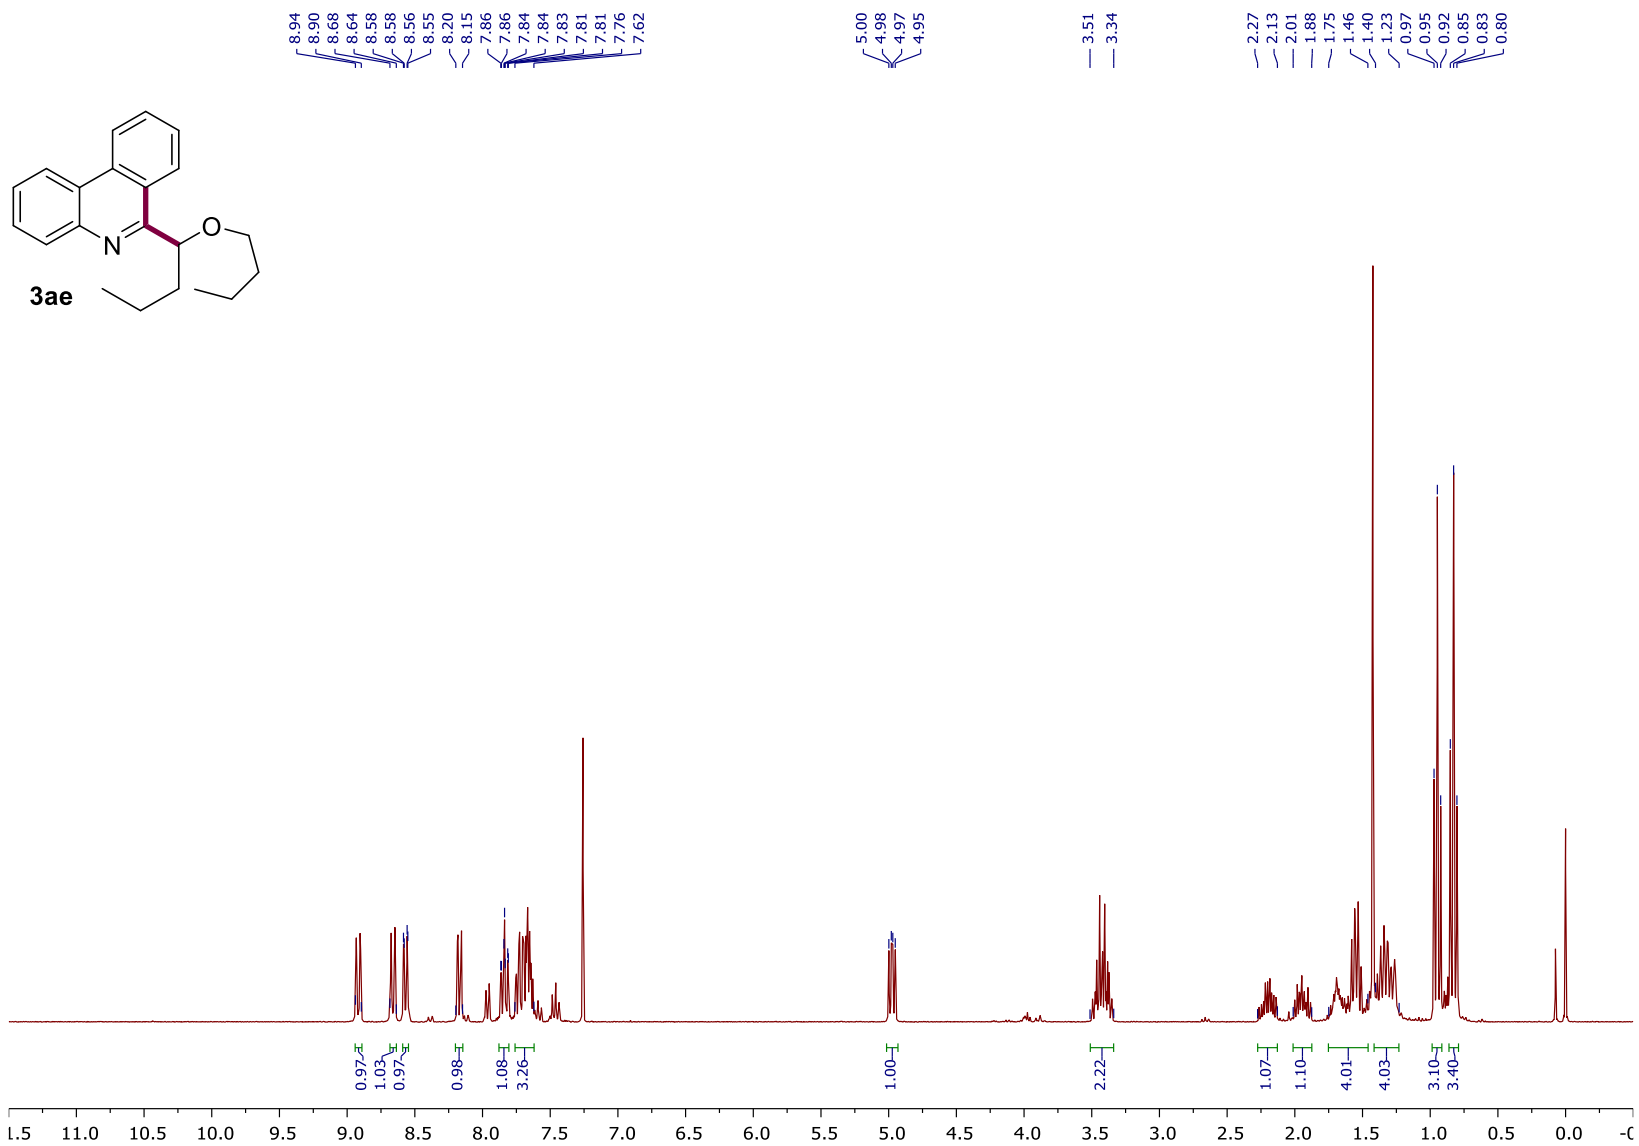

$^{13}\text{C}$ -NMR (101 MHz,  $\text{CDCl}_3$ )

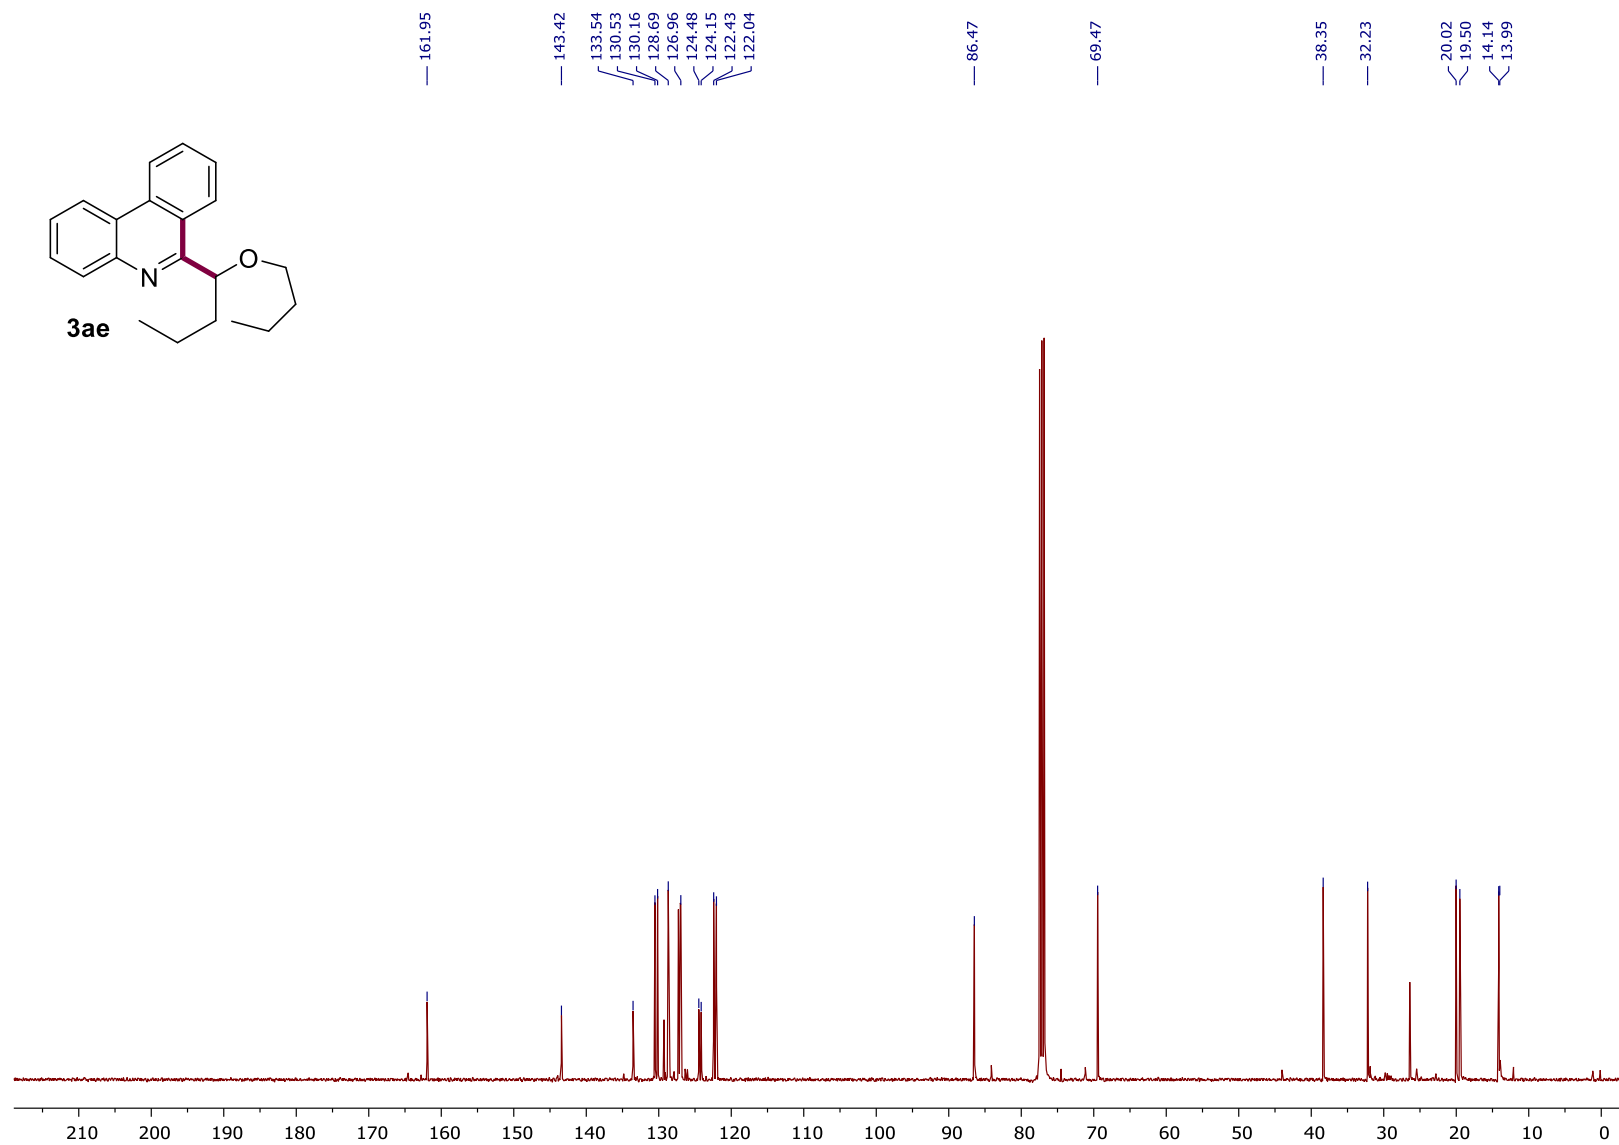

$^1\text{H}$ -NMR (300 MHz,  $\text{CDCl}_3$ )

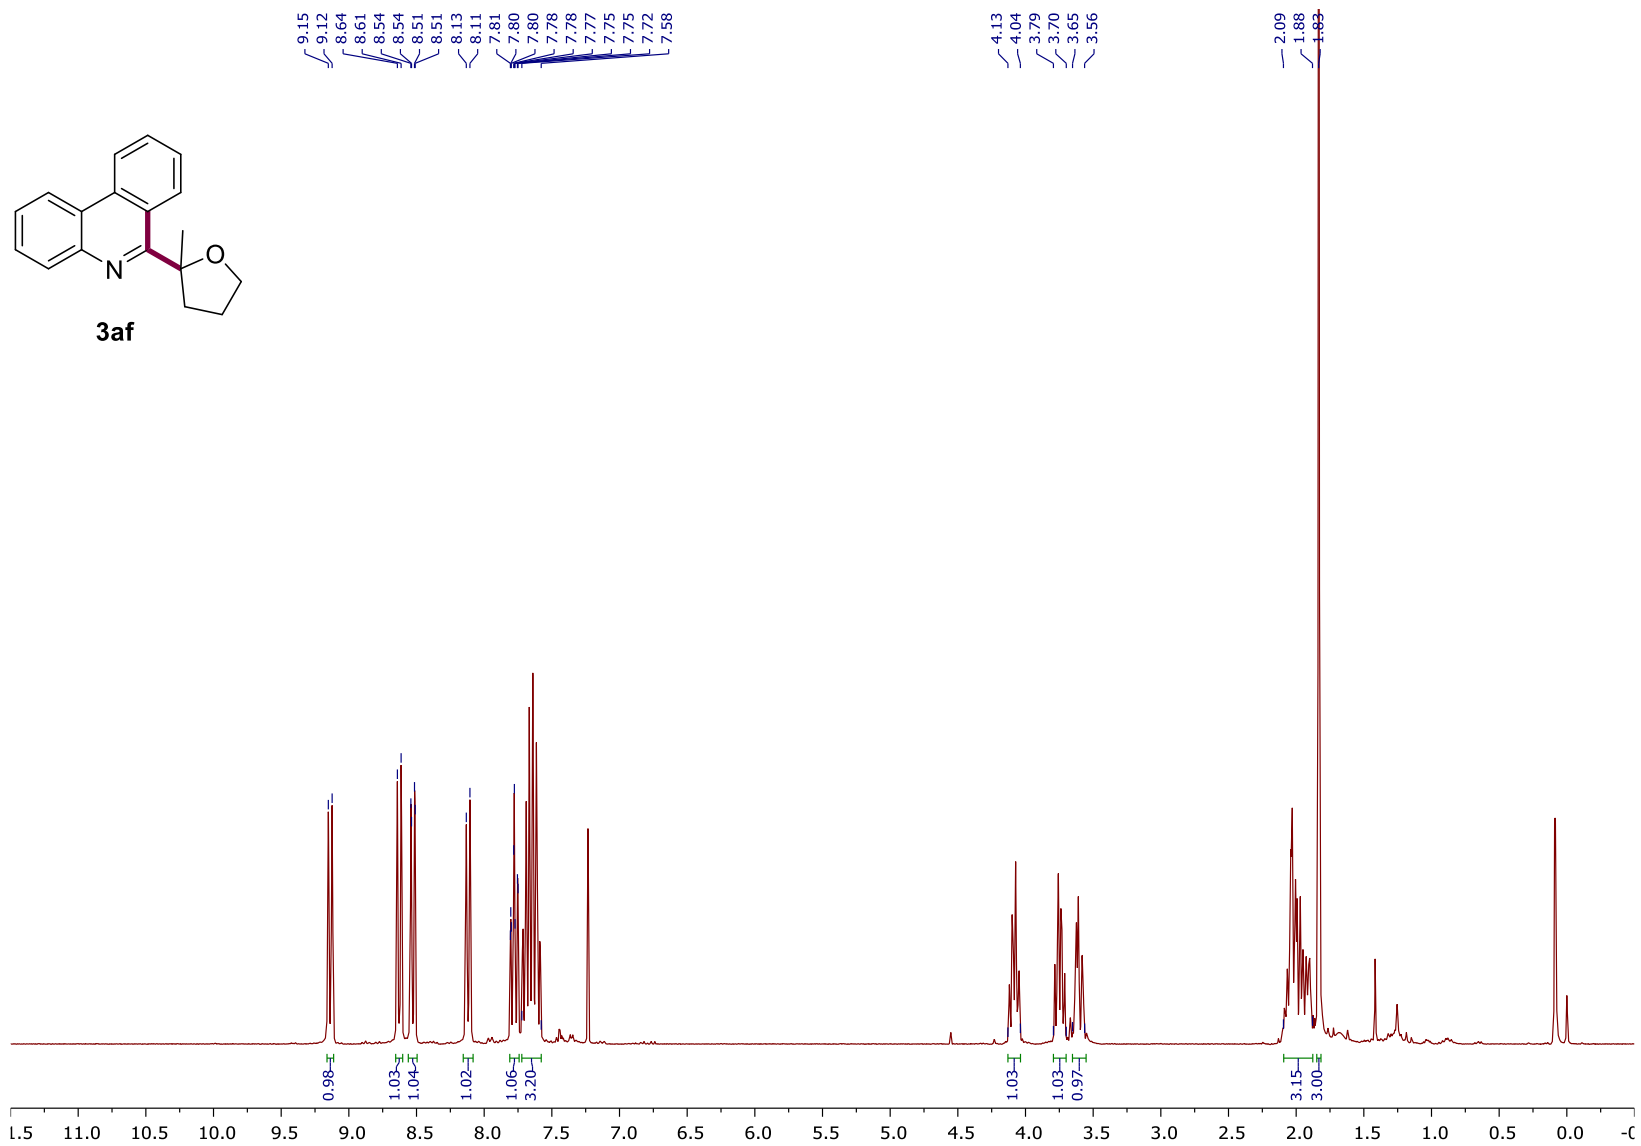

$^{13}\text{C}$ -NMR (75 MHz,  $\text{CDCl}_3$ )

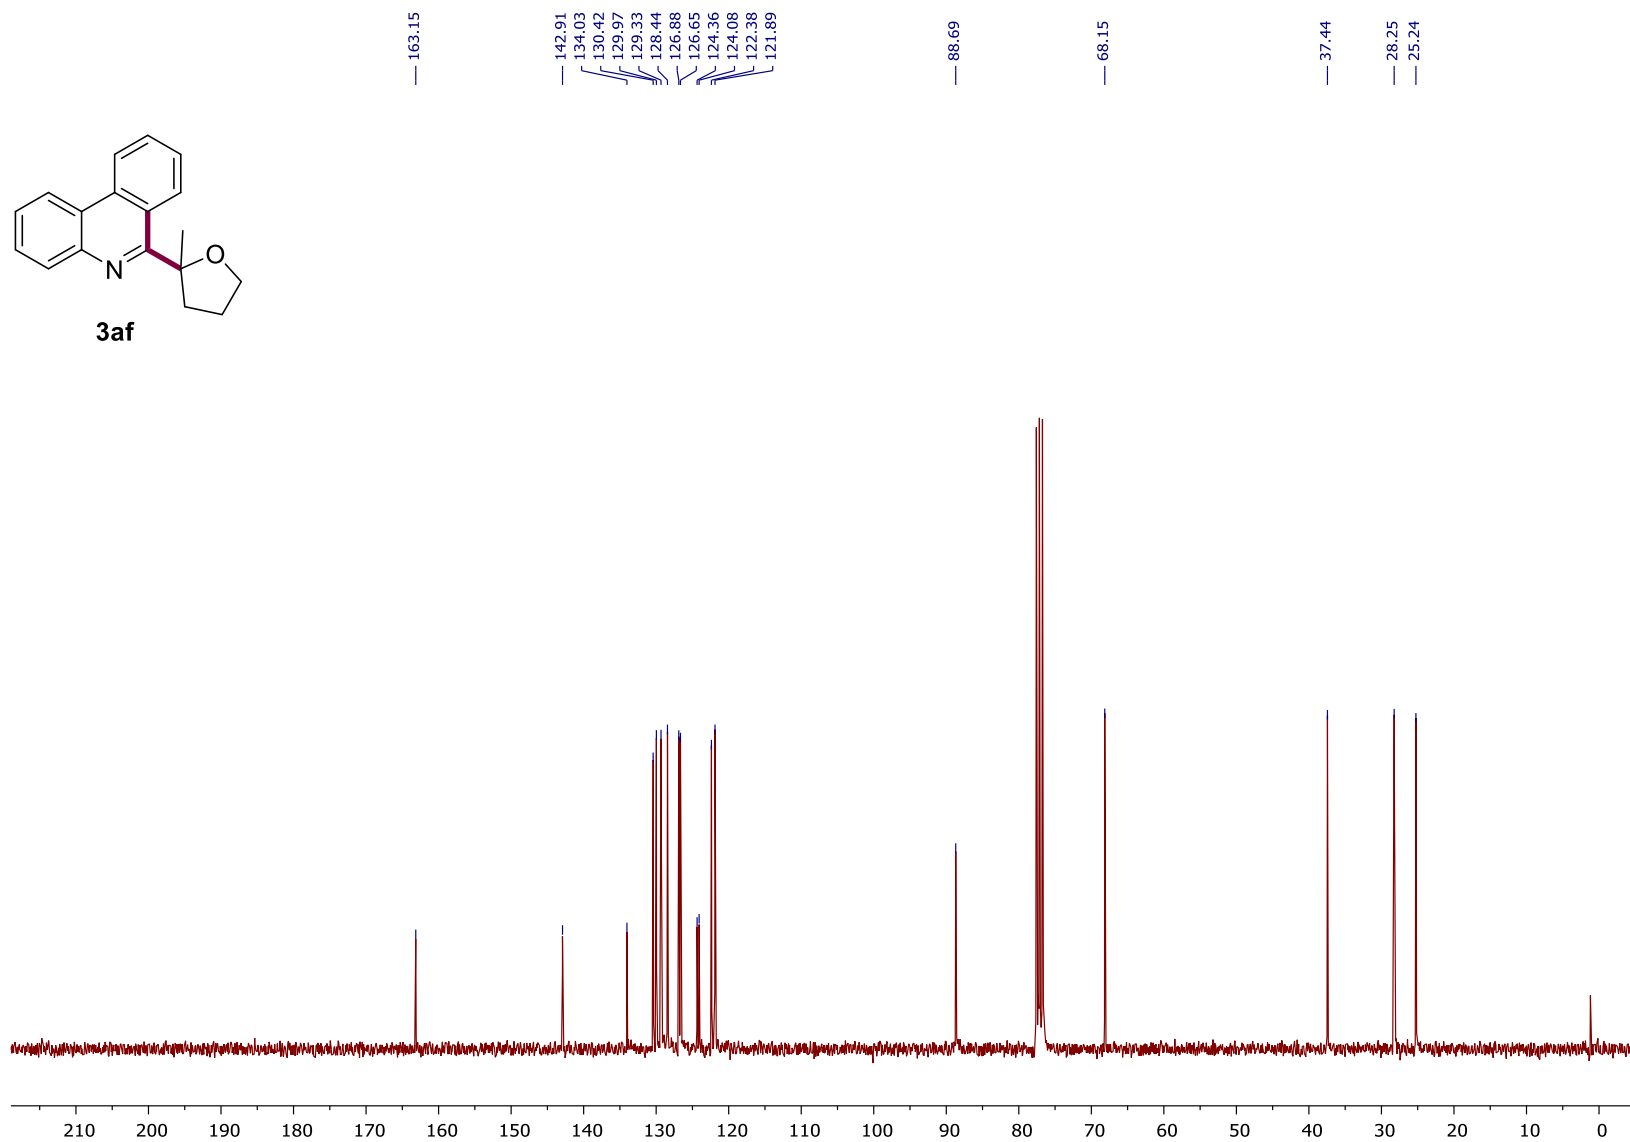

<sup>1</sup>H-NMR (400 MHz, CDCl<sub>3</sub>)

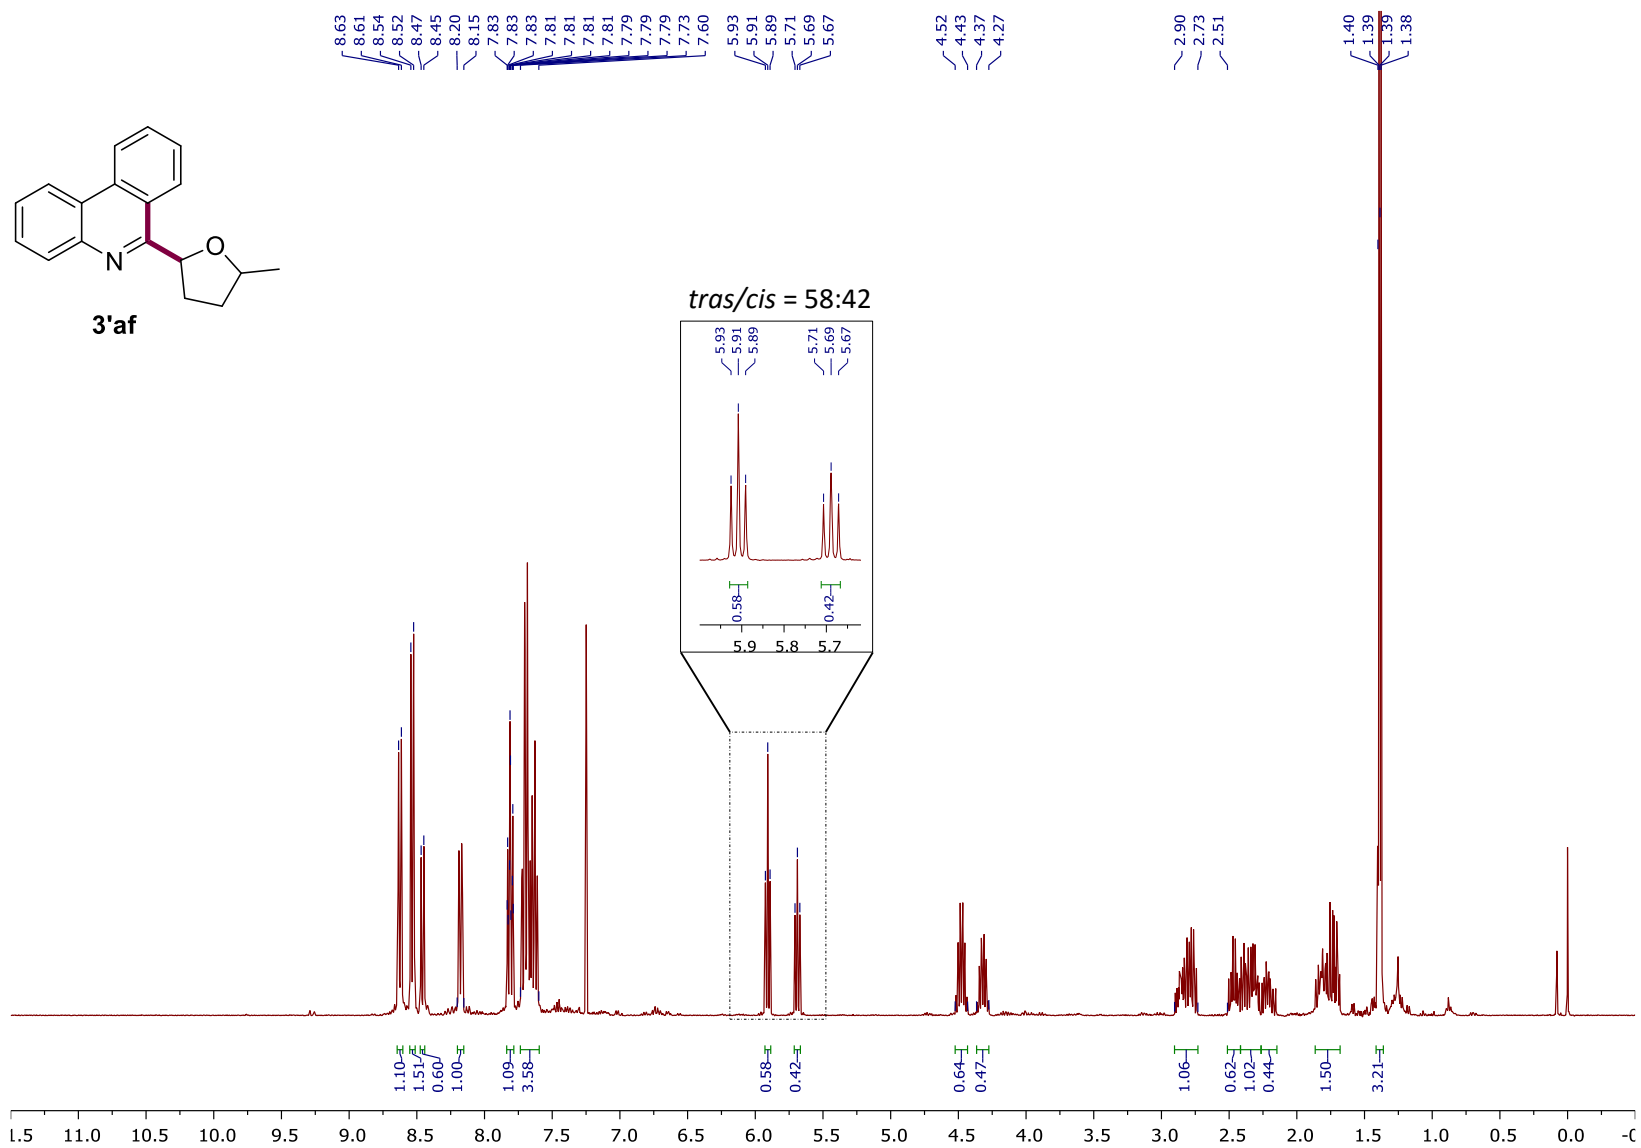

$^{13}\text{C}$ -NMR (75 MHz,  $\text{CDCl}_3$ )

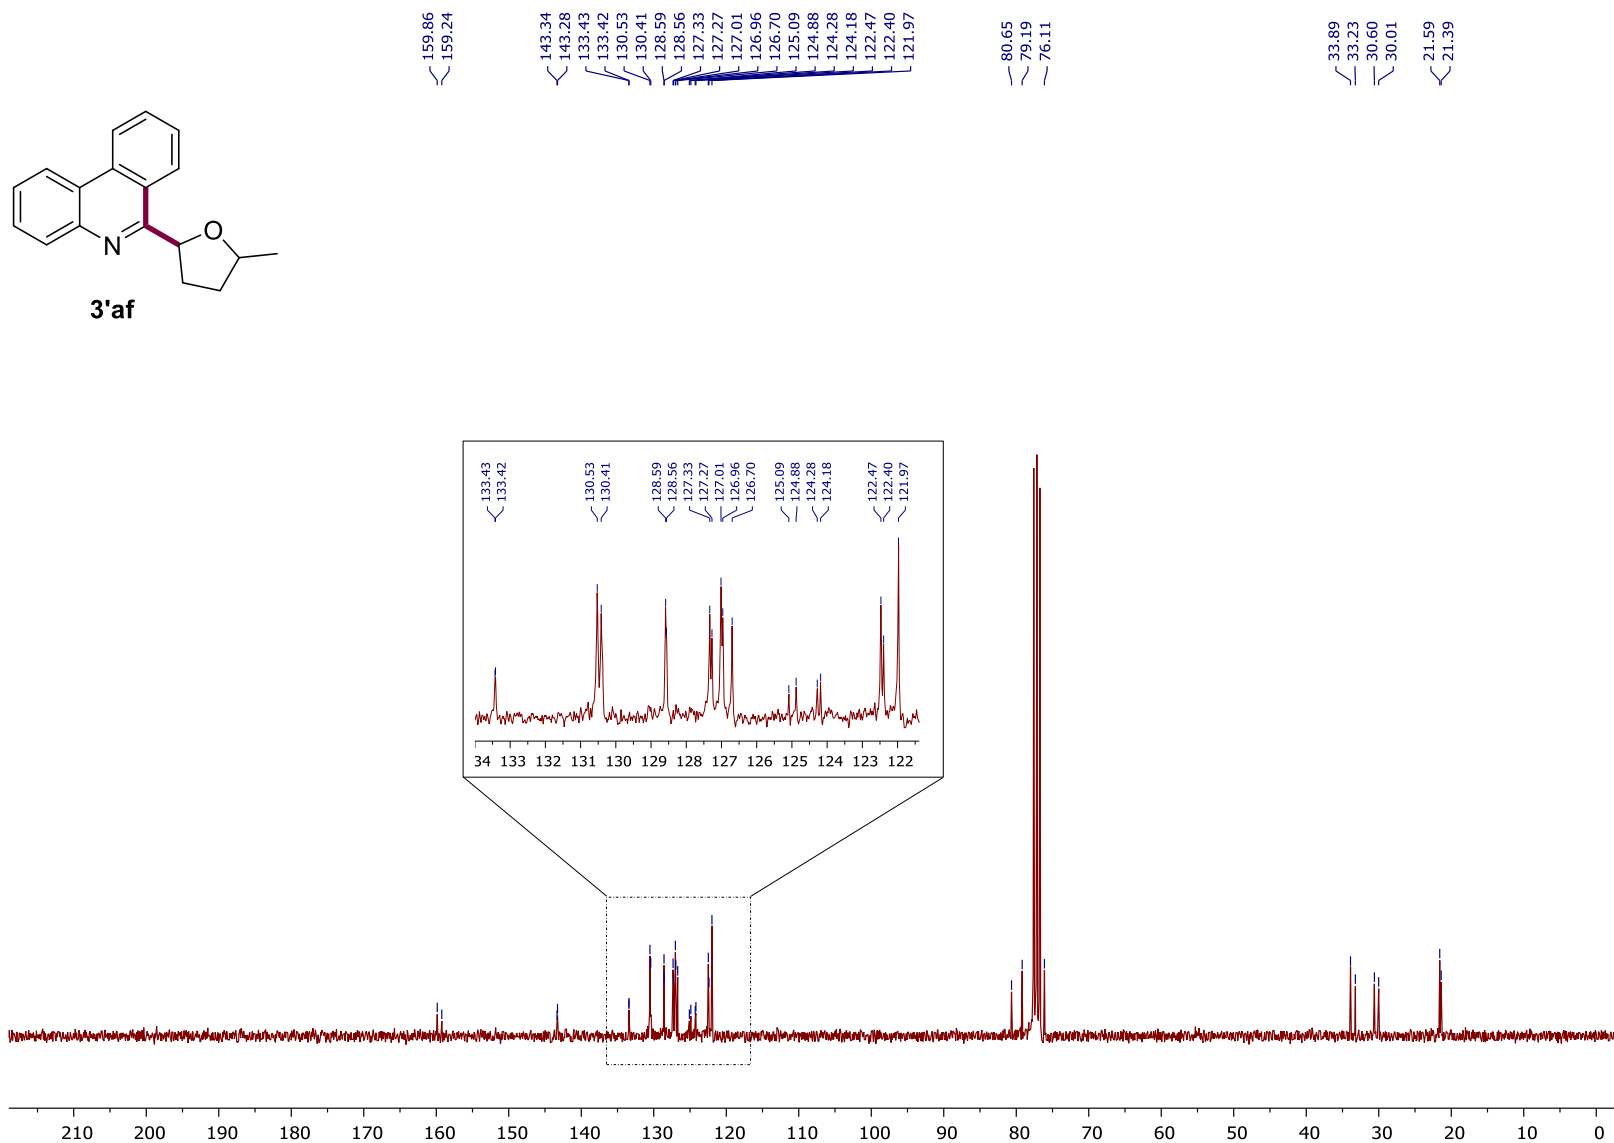



$^1\text{H}$ -NMR (300 MHz,  $\text{CDCl}_3$ )

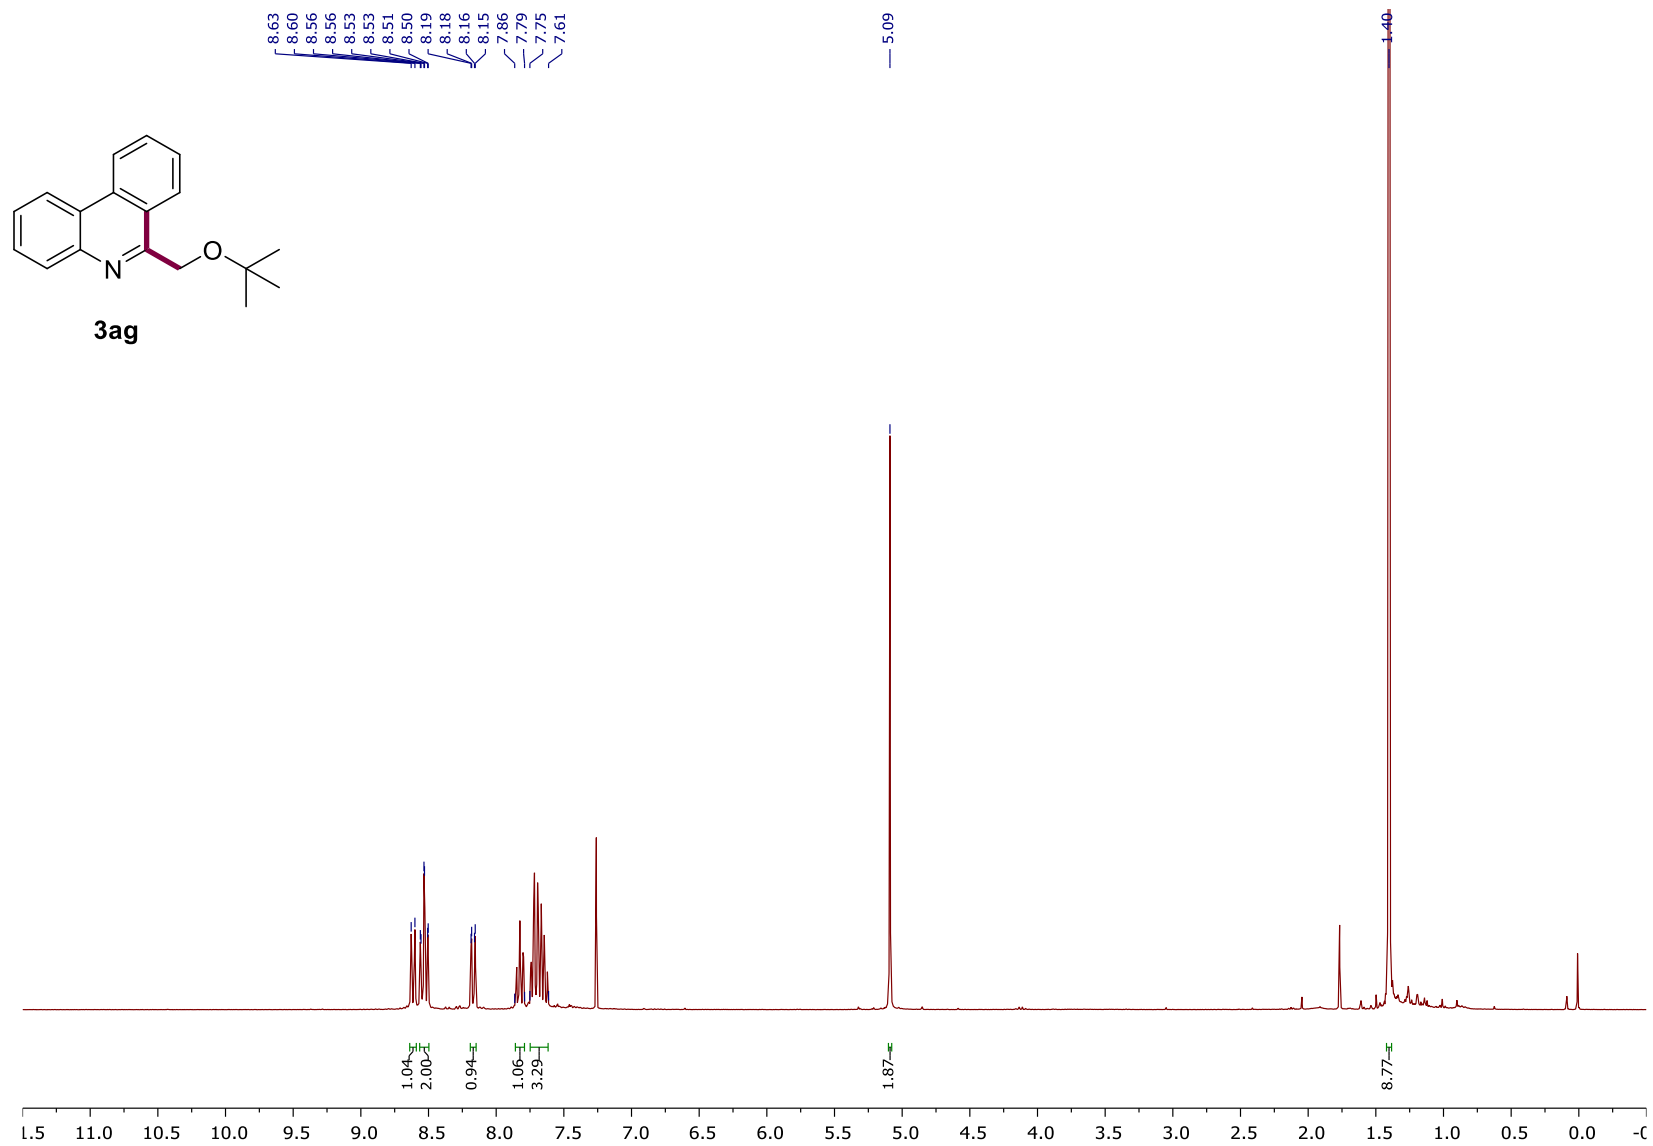

$^{13}\text{C}$ -NMR (75 MHz,  $\text{CDCl}_3$ )

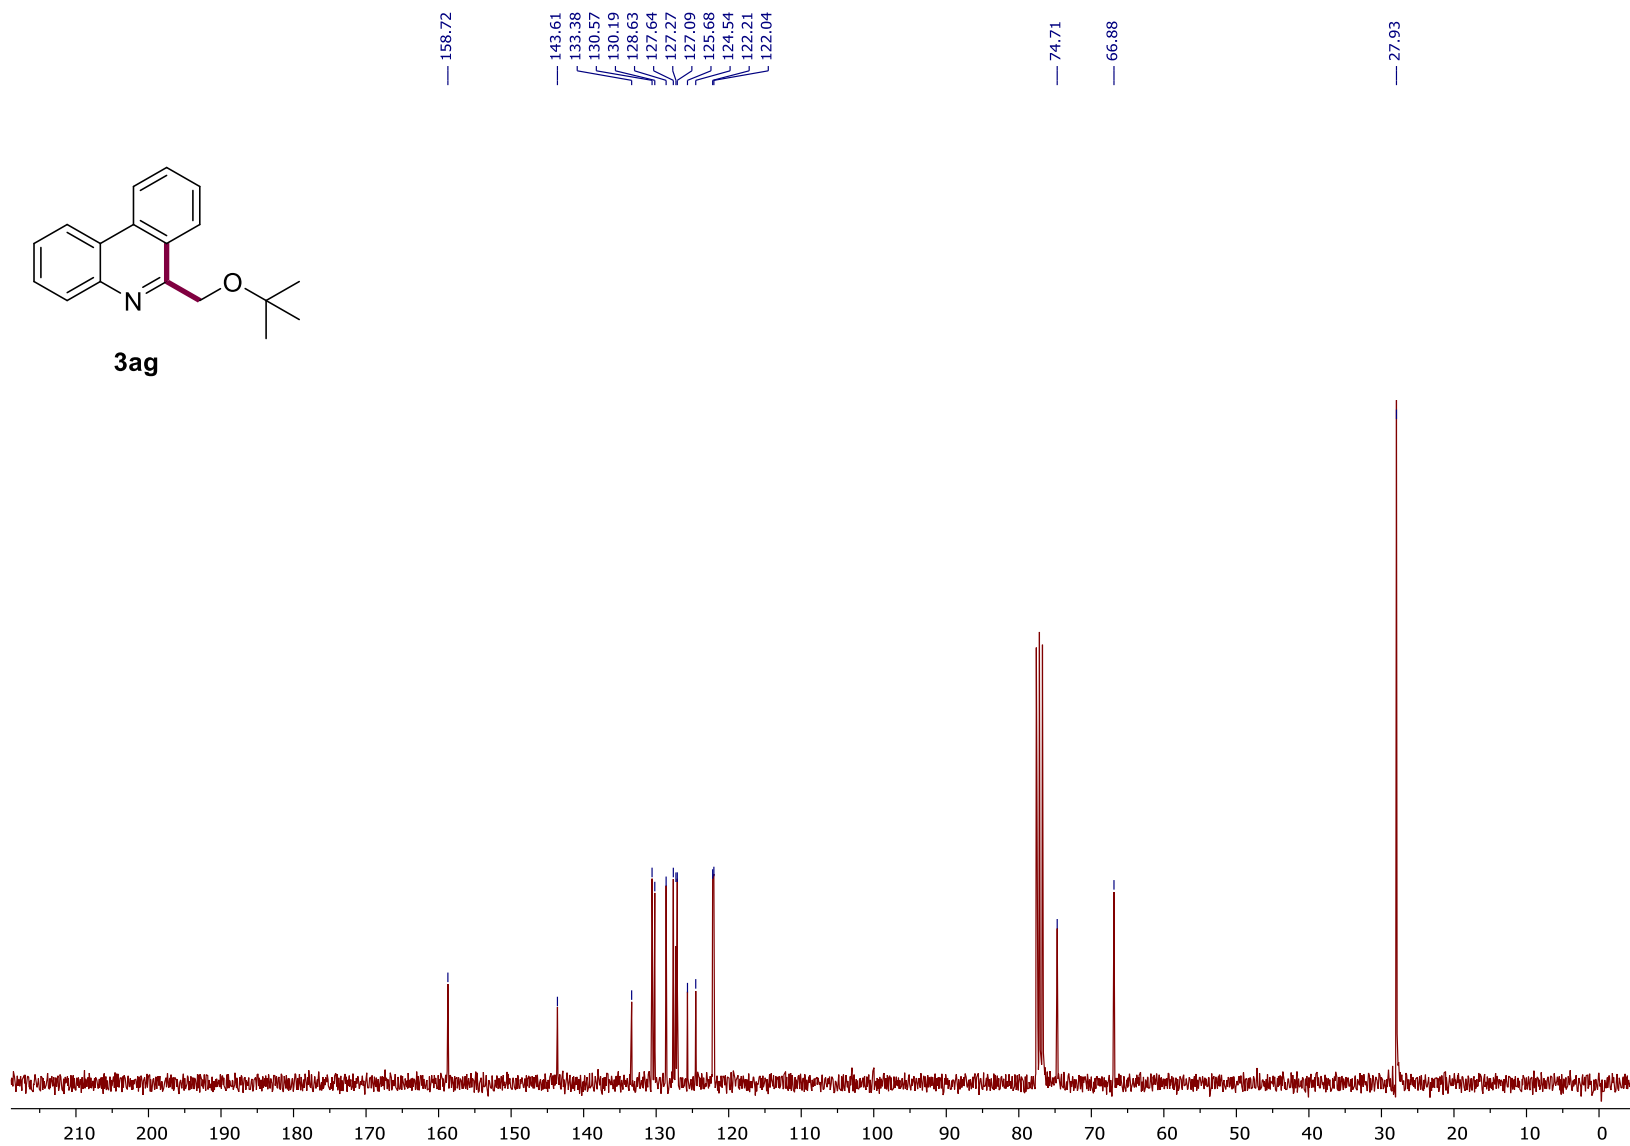

$^1\text{H-NMR}$  (300 MHz,  $\text{CDCl}_3$ )

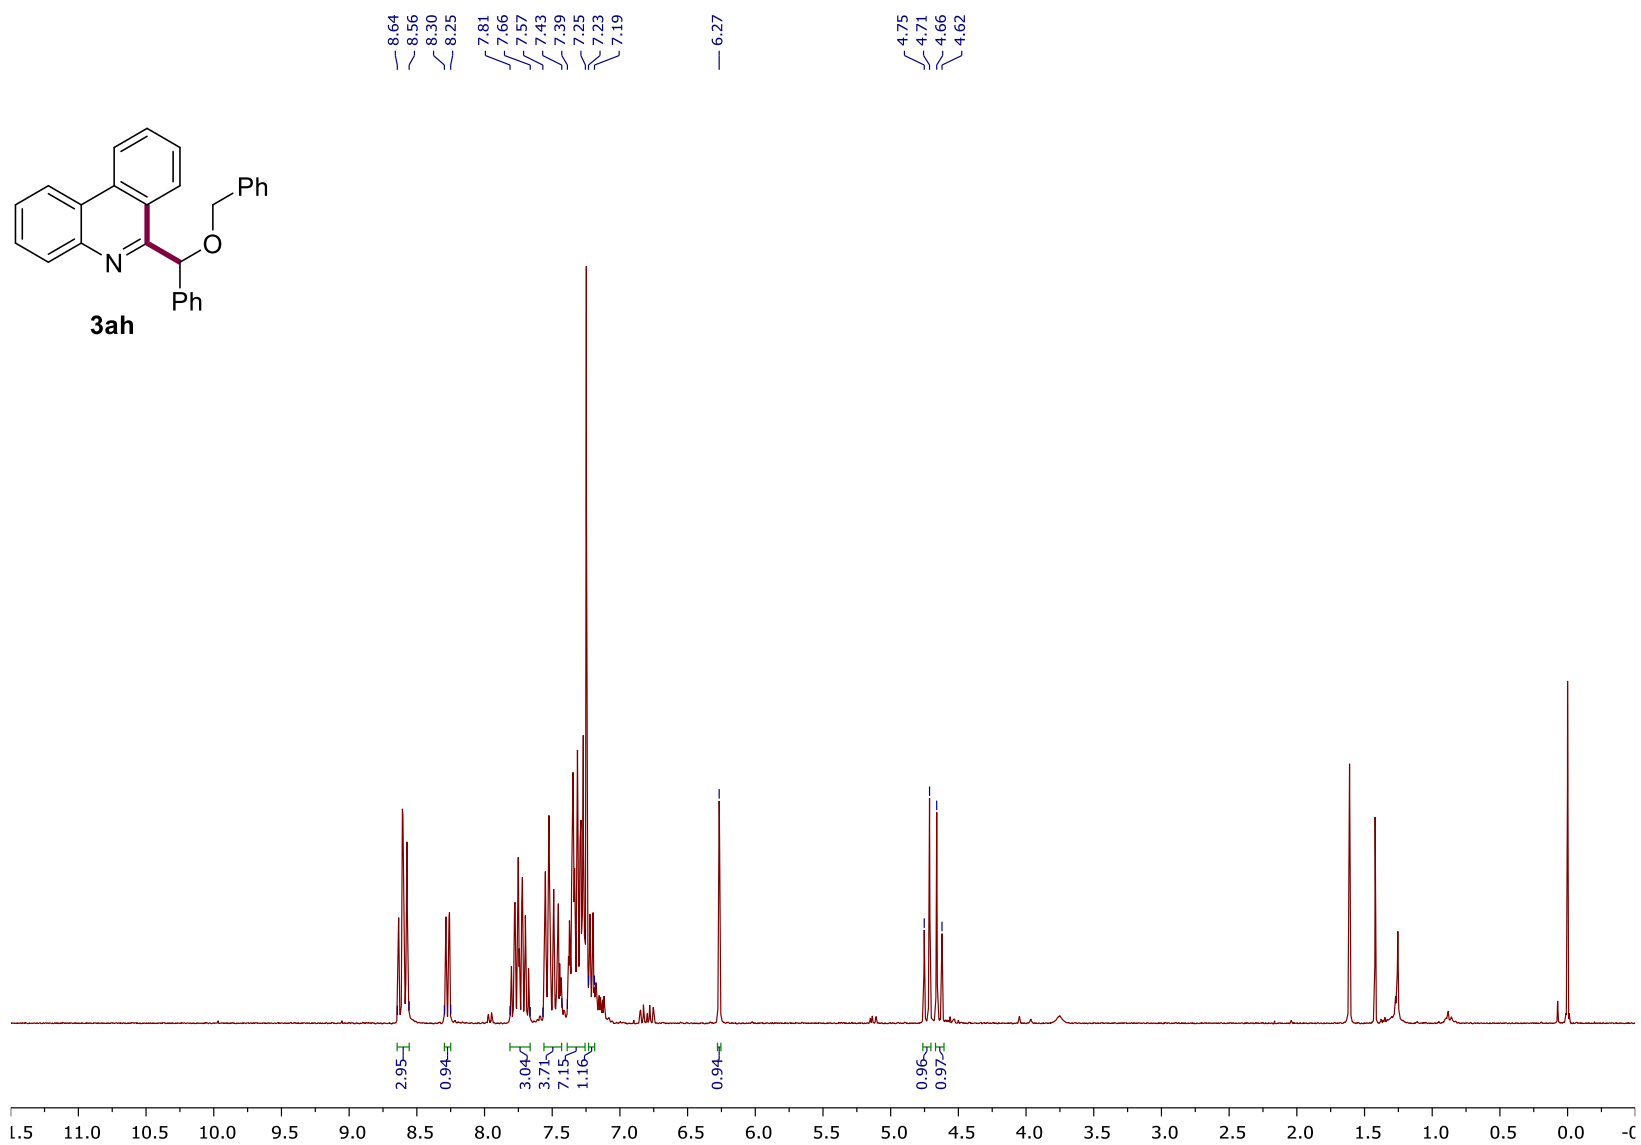

$^{13}\text{C}$ -NMR (101 MHz,  $\text{CDCl}_3$ )

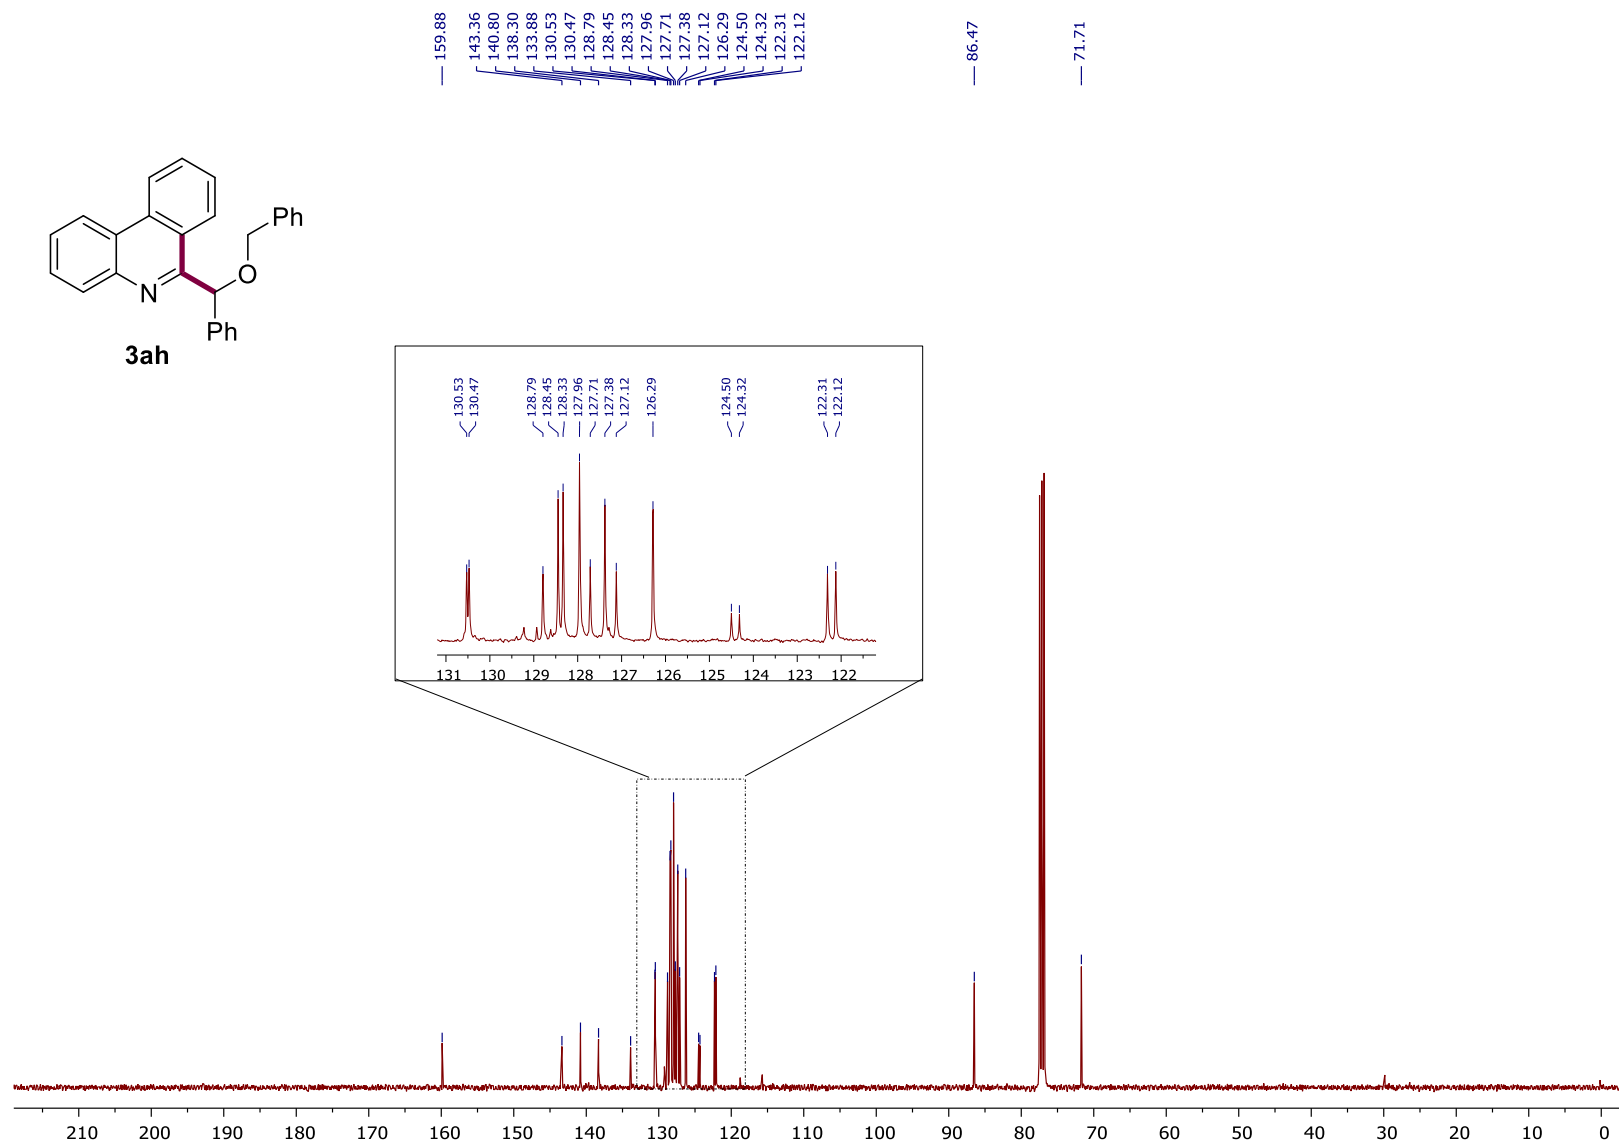

<sup>1</sup>H-NMR (300 MHz, CDCl<sub>3</sub>)

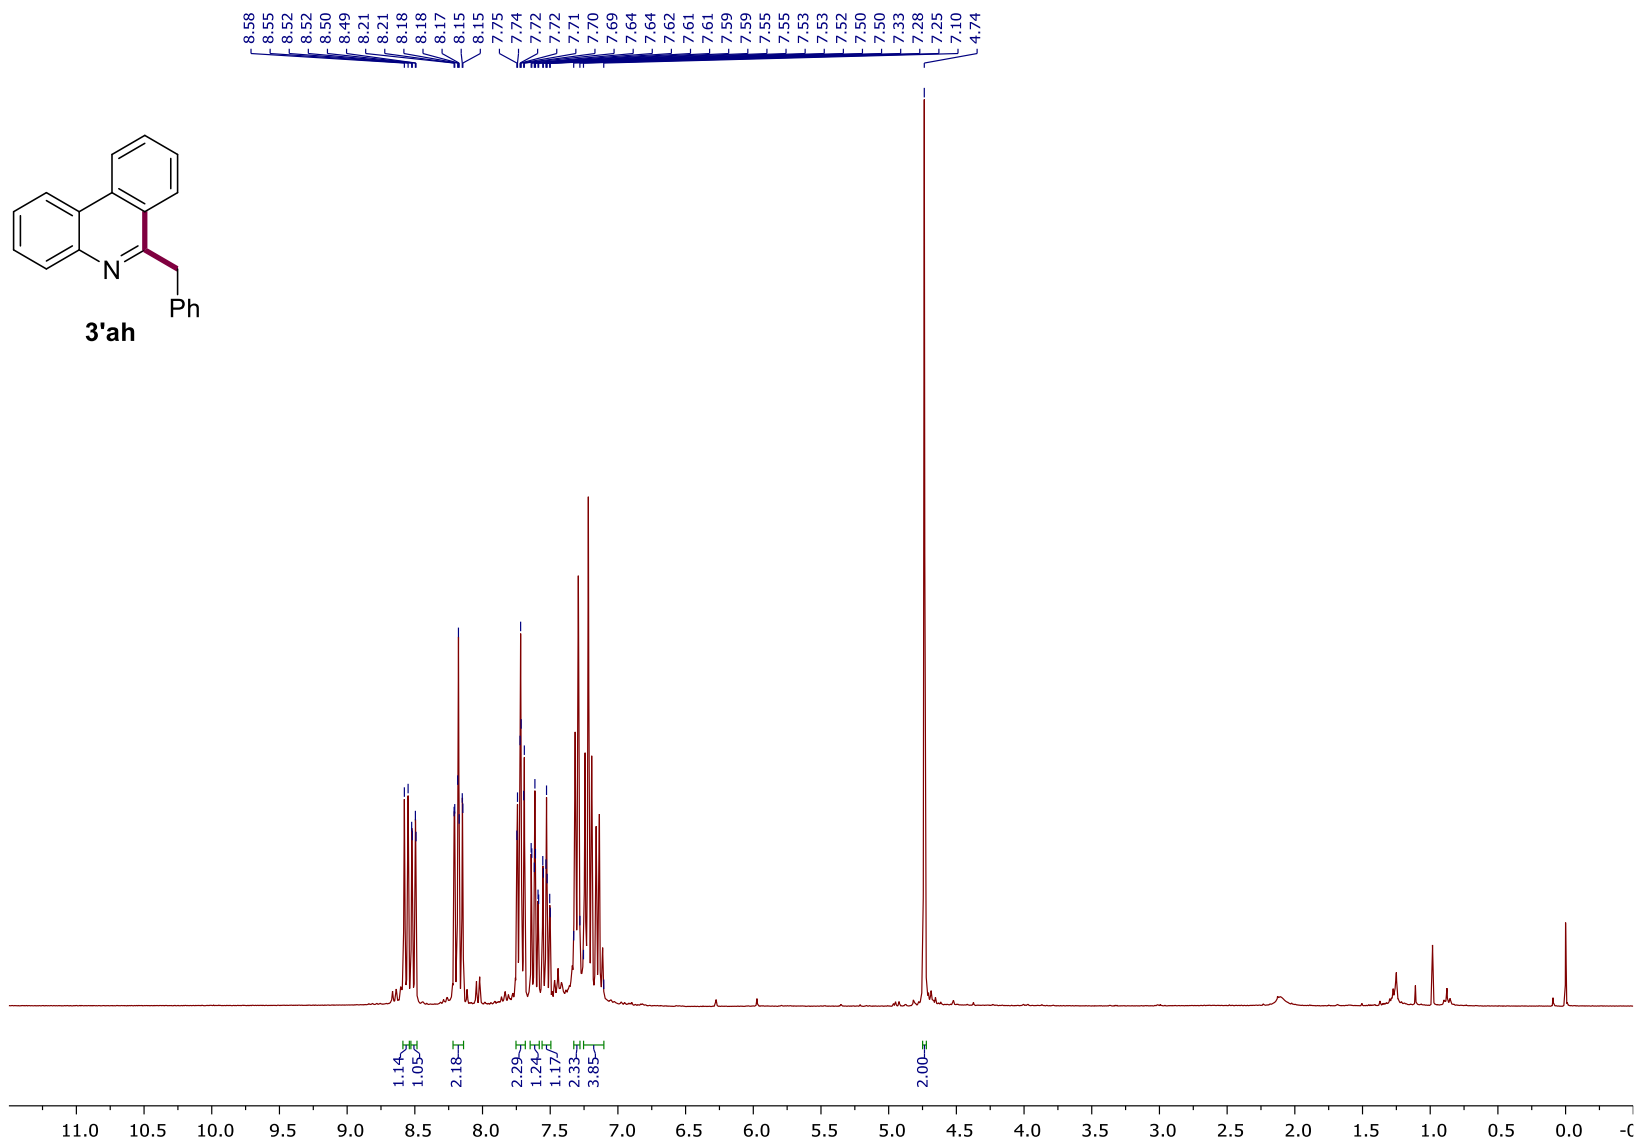

$^{13}\text{C}$ -NMR (101 MHz,  $\text{CDCl}_3$ )

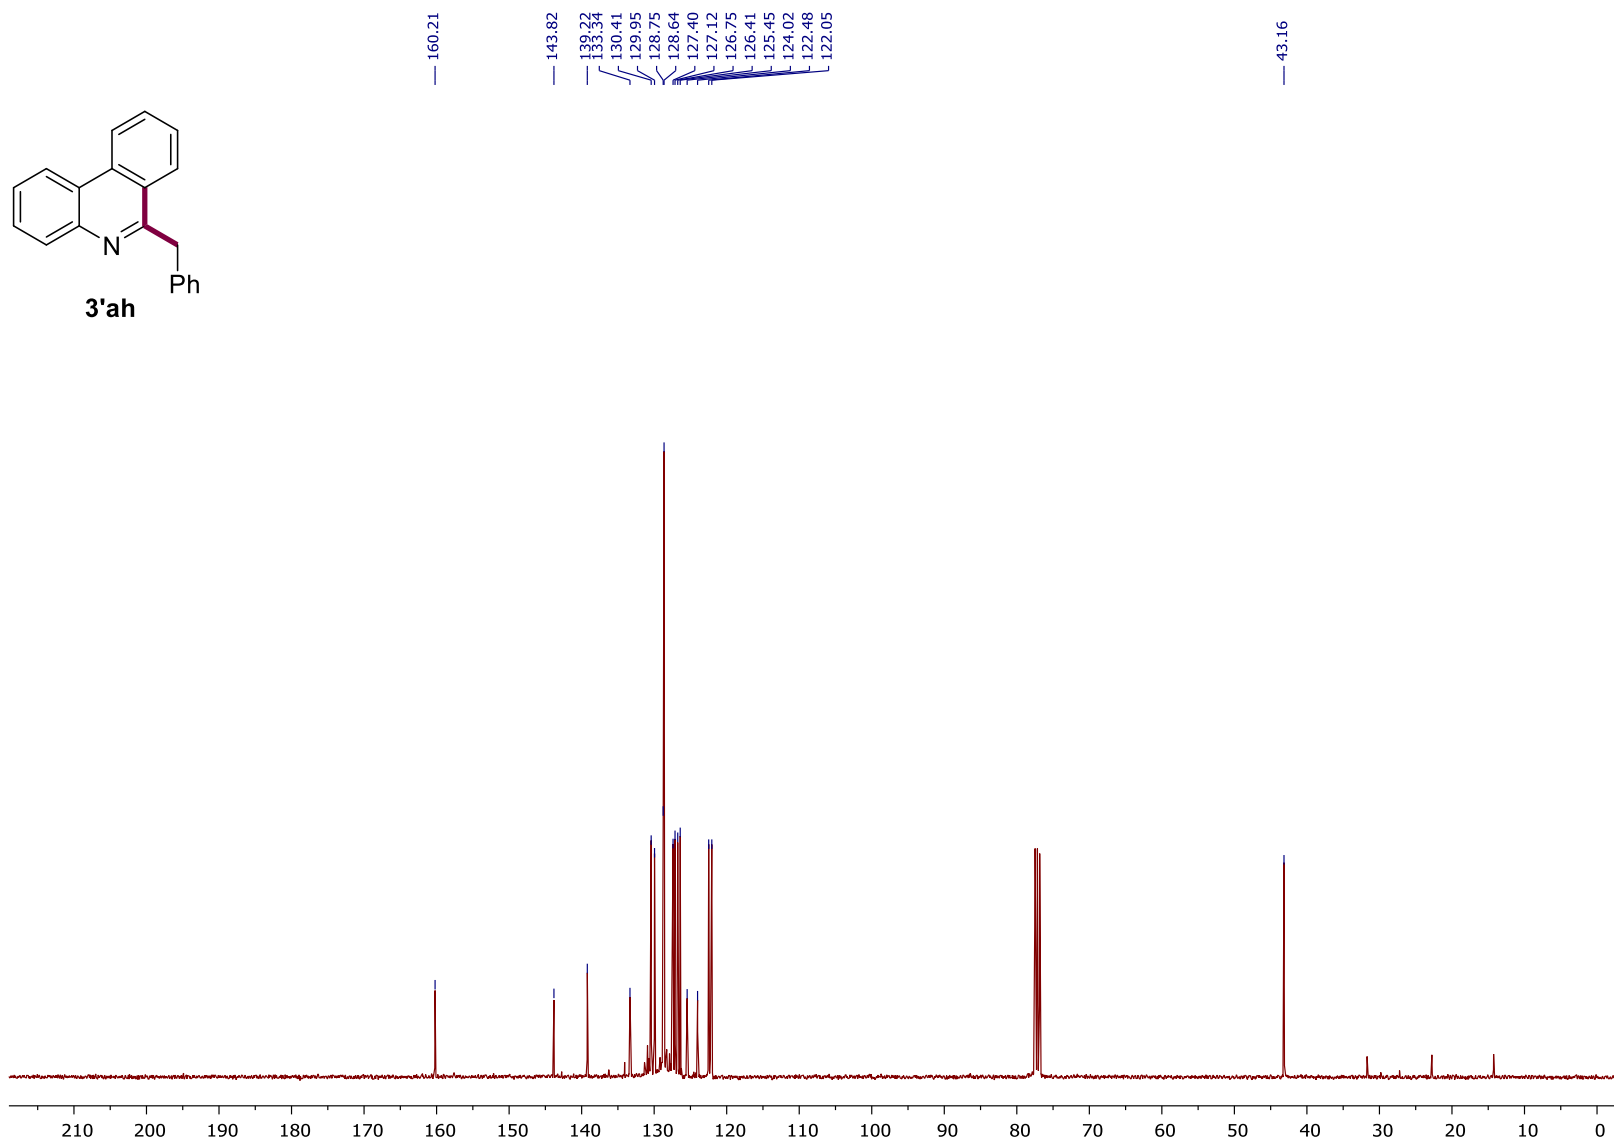

<sup>1</sup>H-NMR (400 MHz, CDCl<sub>3</sub>)

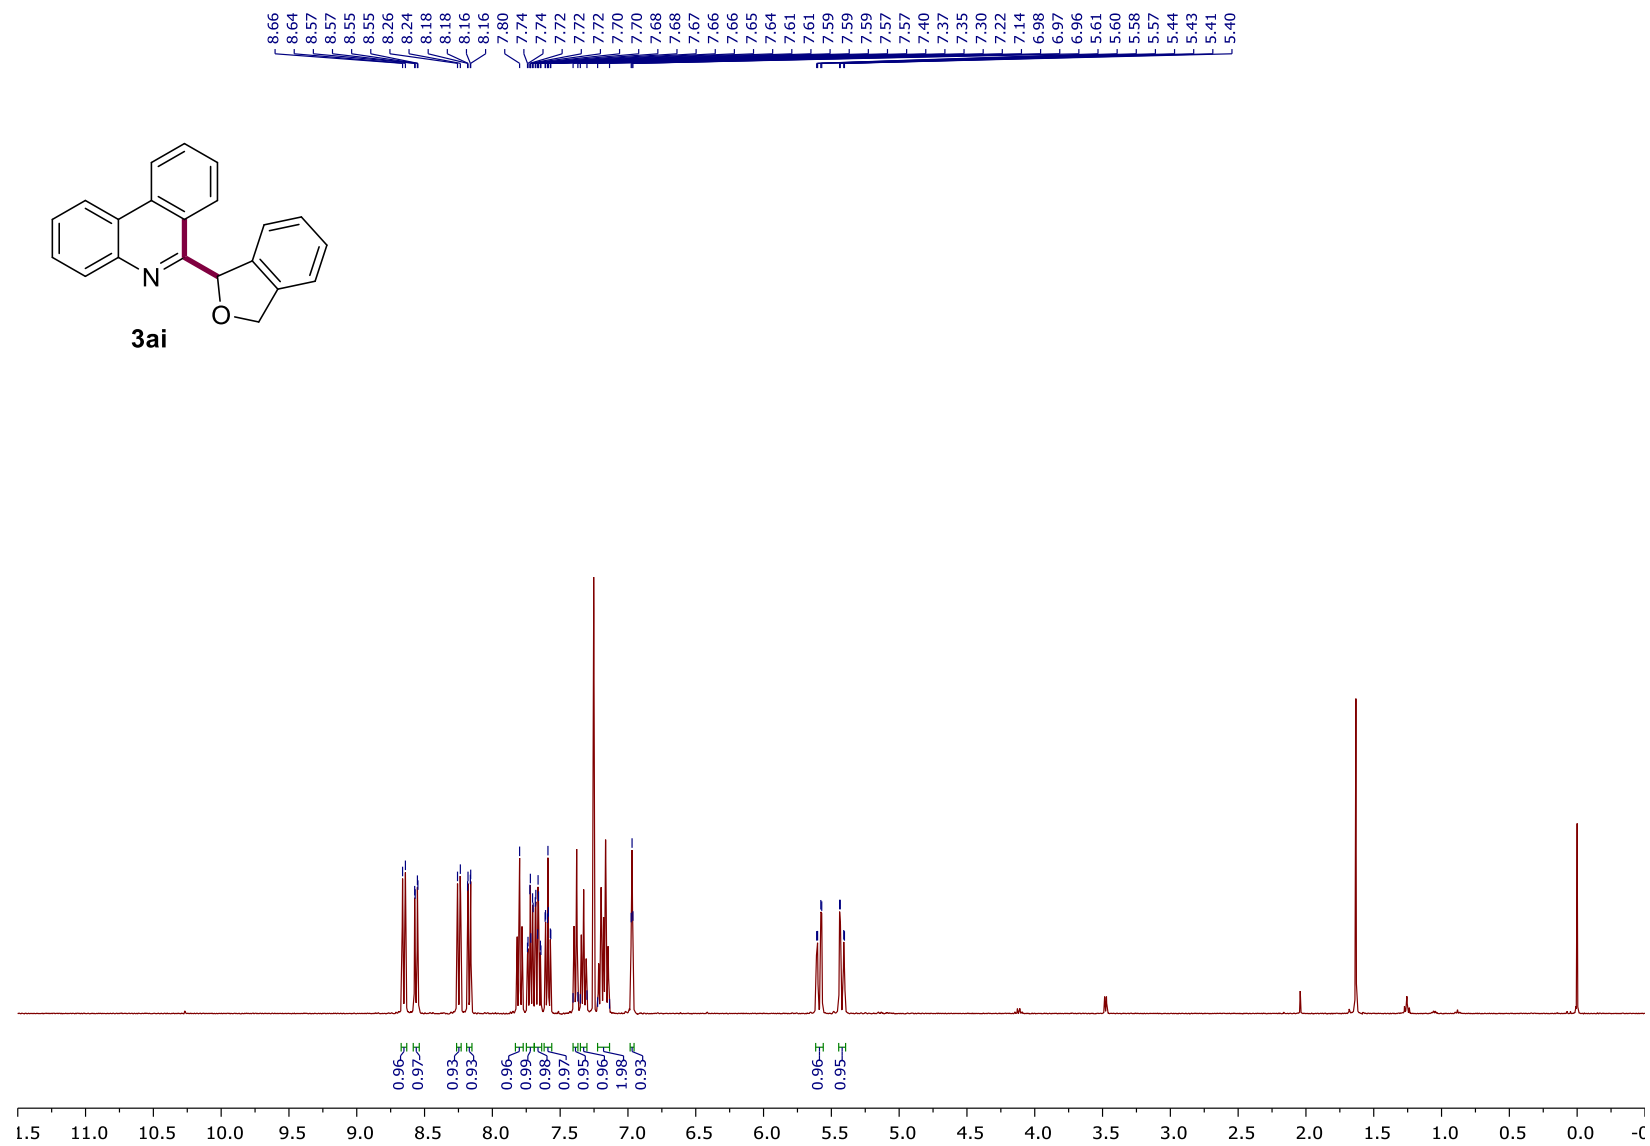

$^{13}\text{C}$ -NMR (101 MHz,  $\text{CDCl}_3$ )

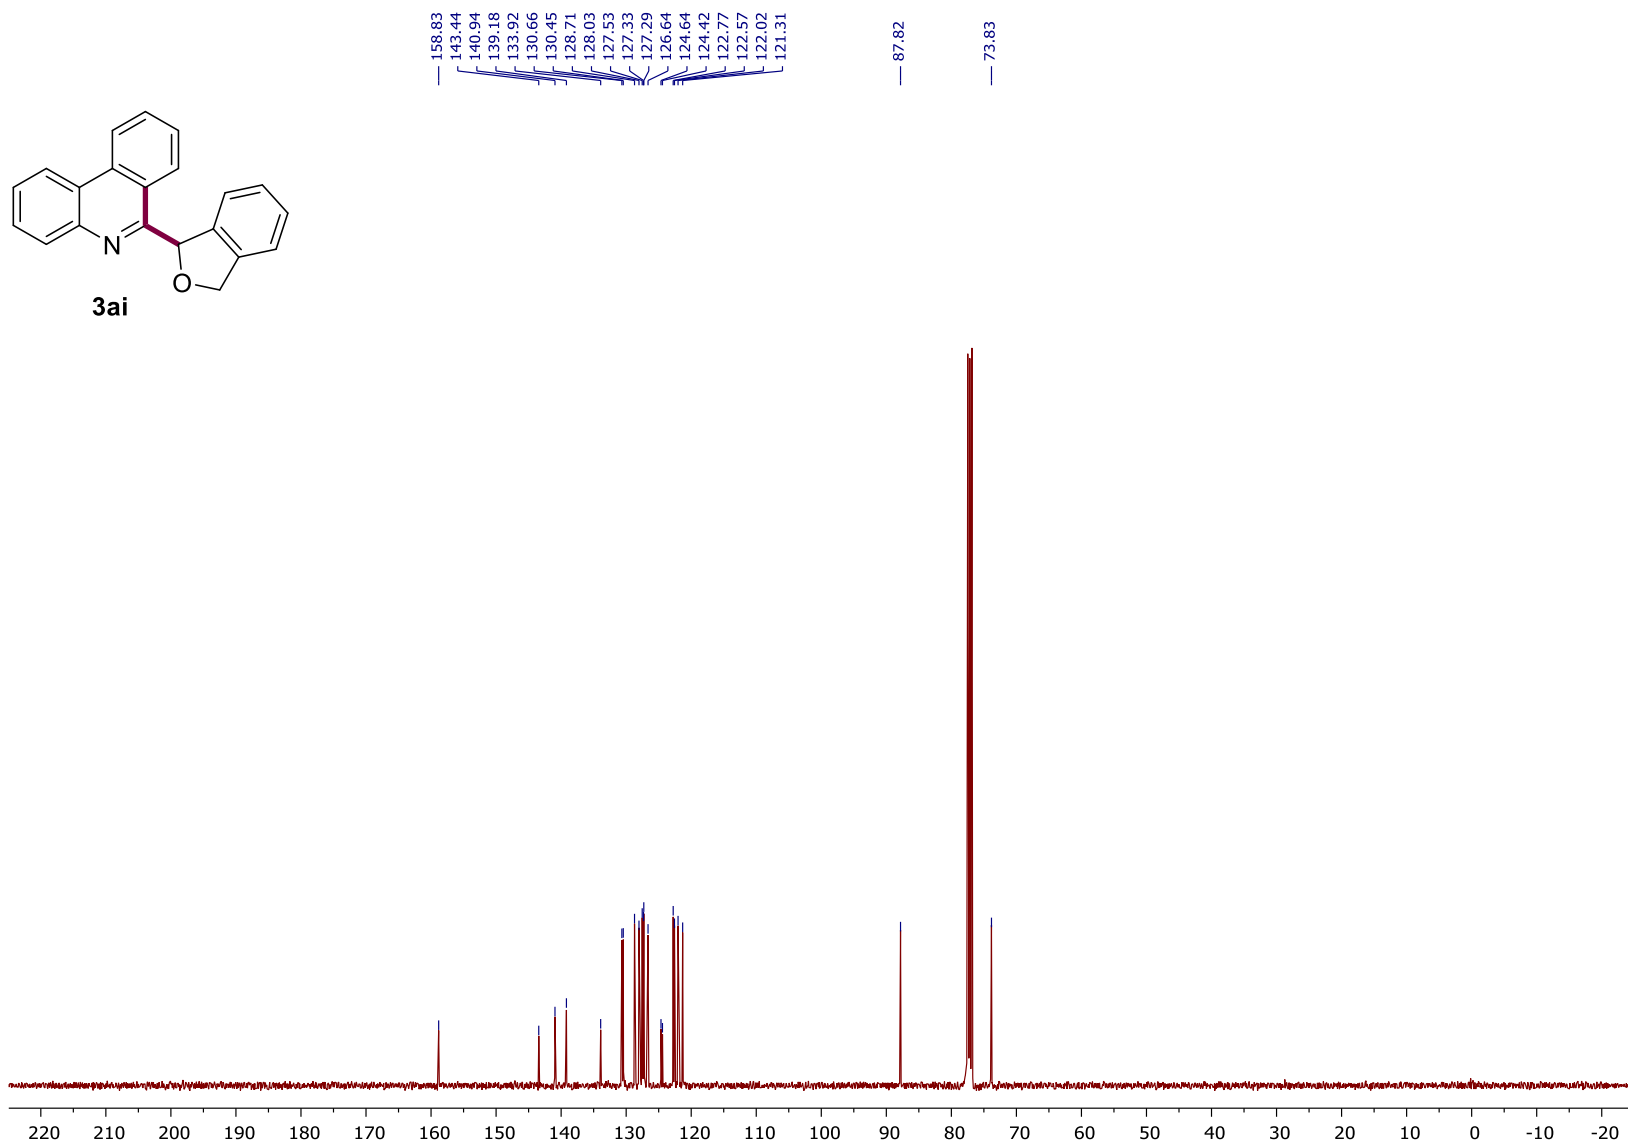



<sup>1</sup>H-NMR (300 MHz, CDCl<sub>3</sub>)

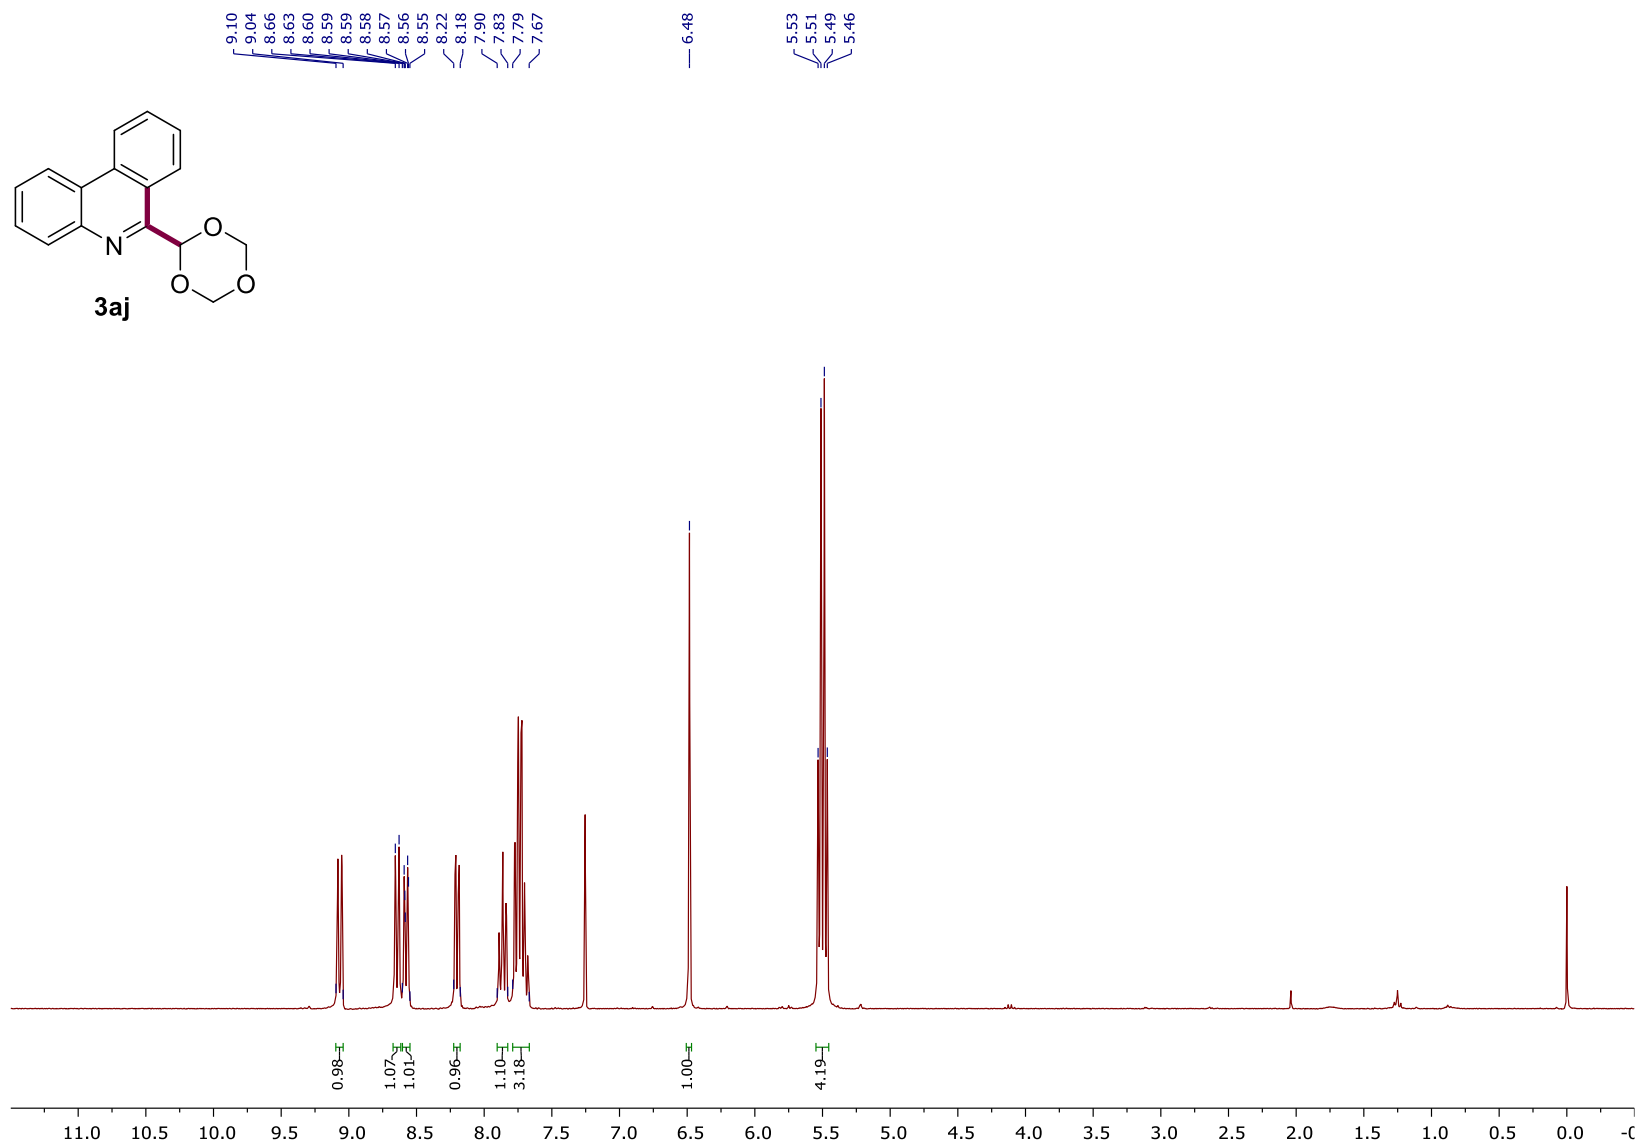

$^{13}\text{C}$ -NMR (75 MHz,  $\text{CDCl}_3$ )

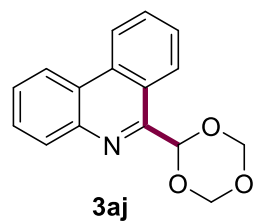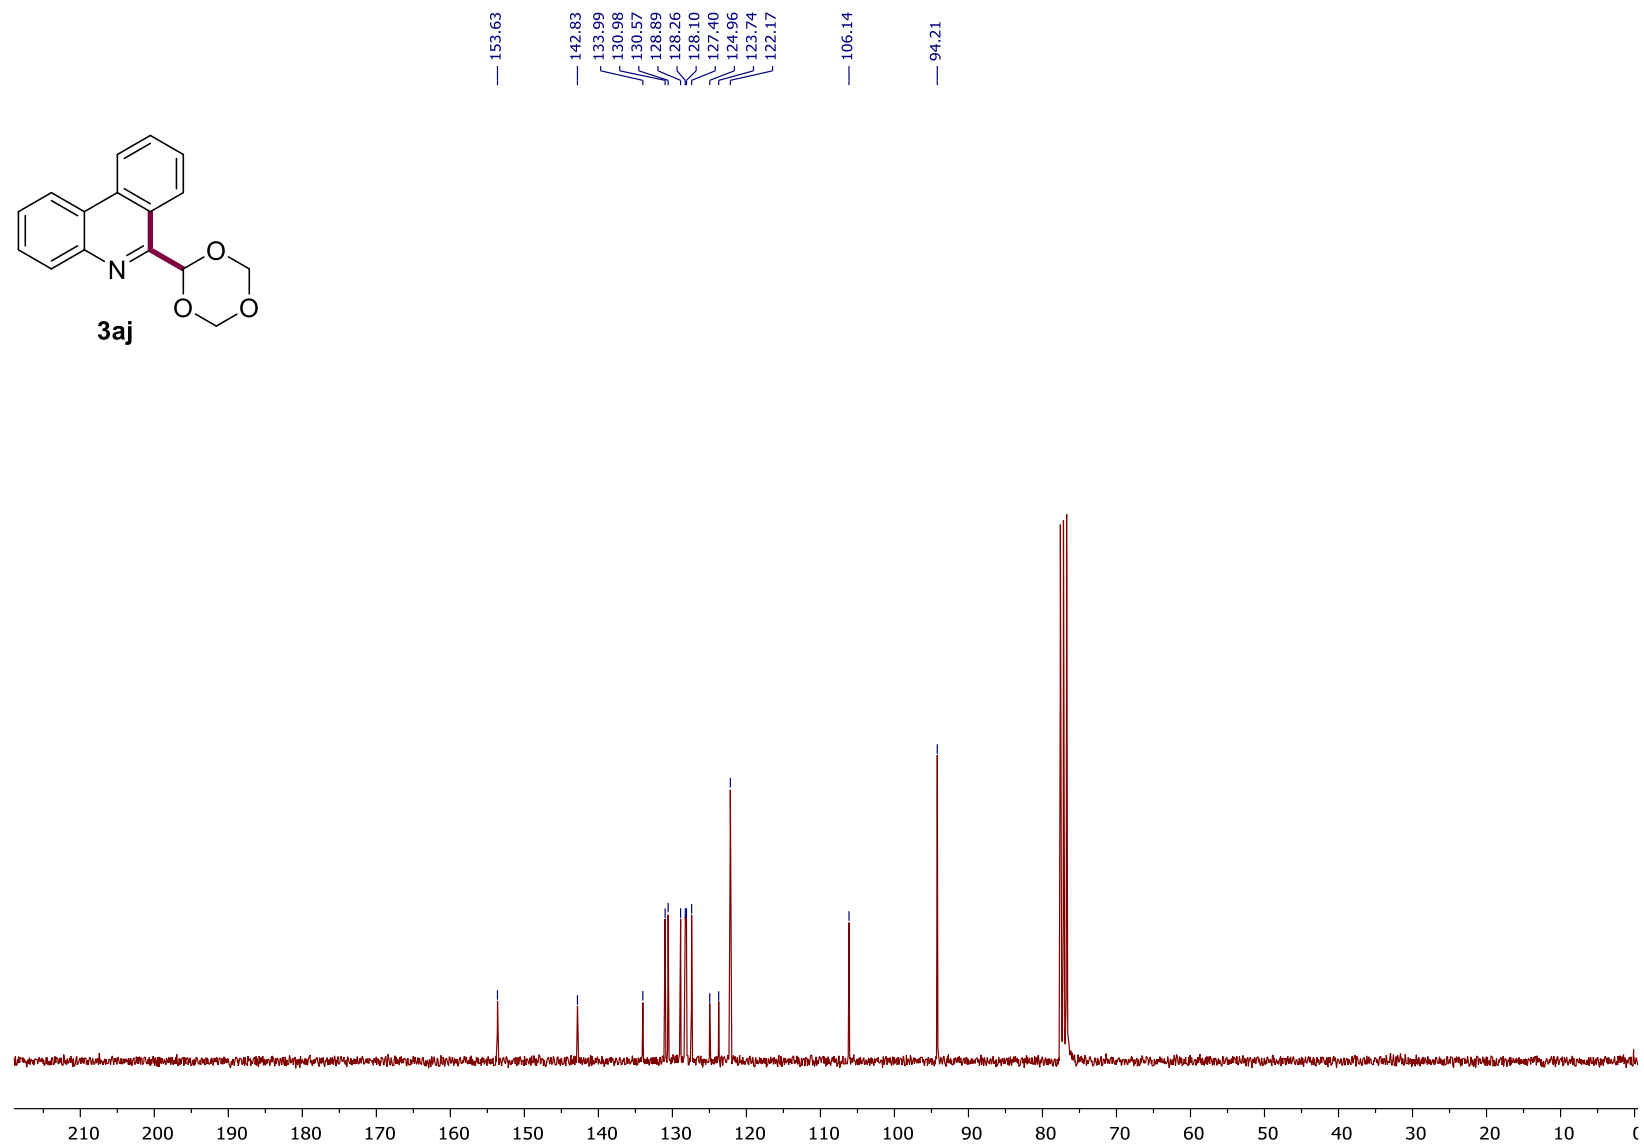

<sup>1</sup>H-NMR (300 MHz, CDCl<sub>3</sub>)

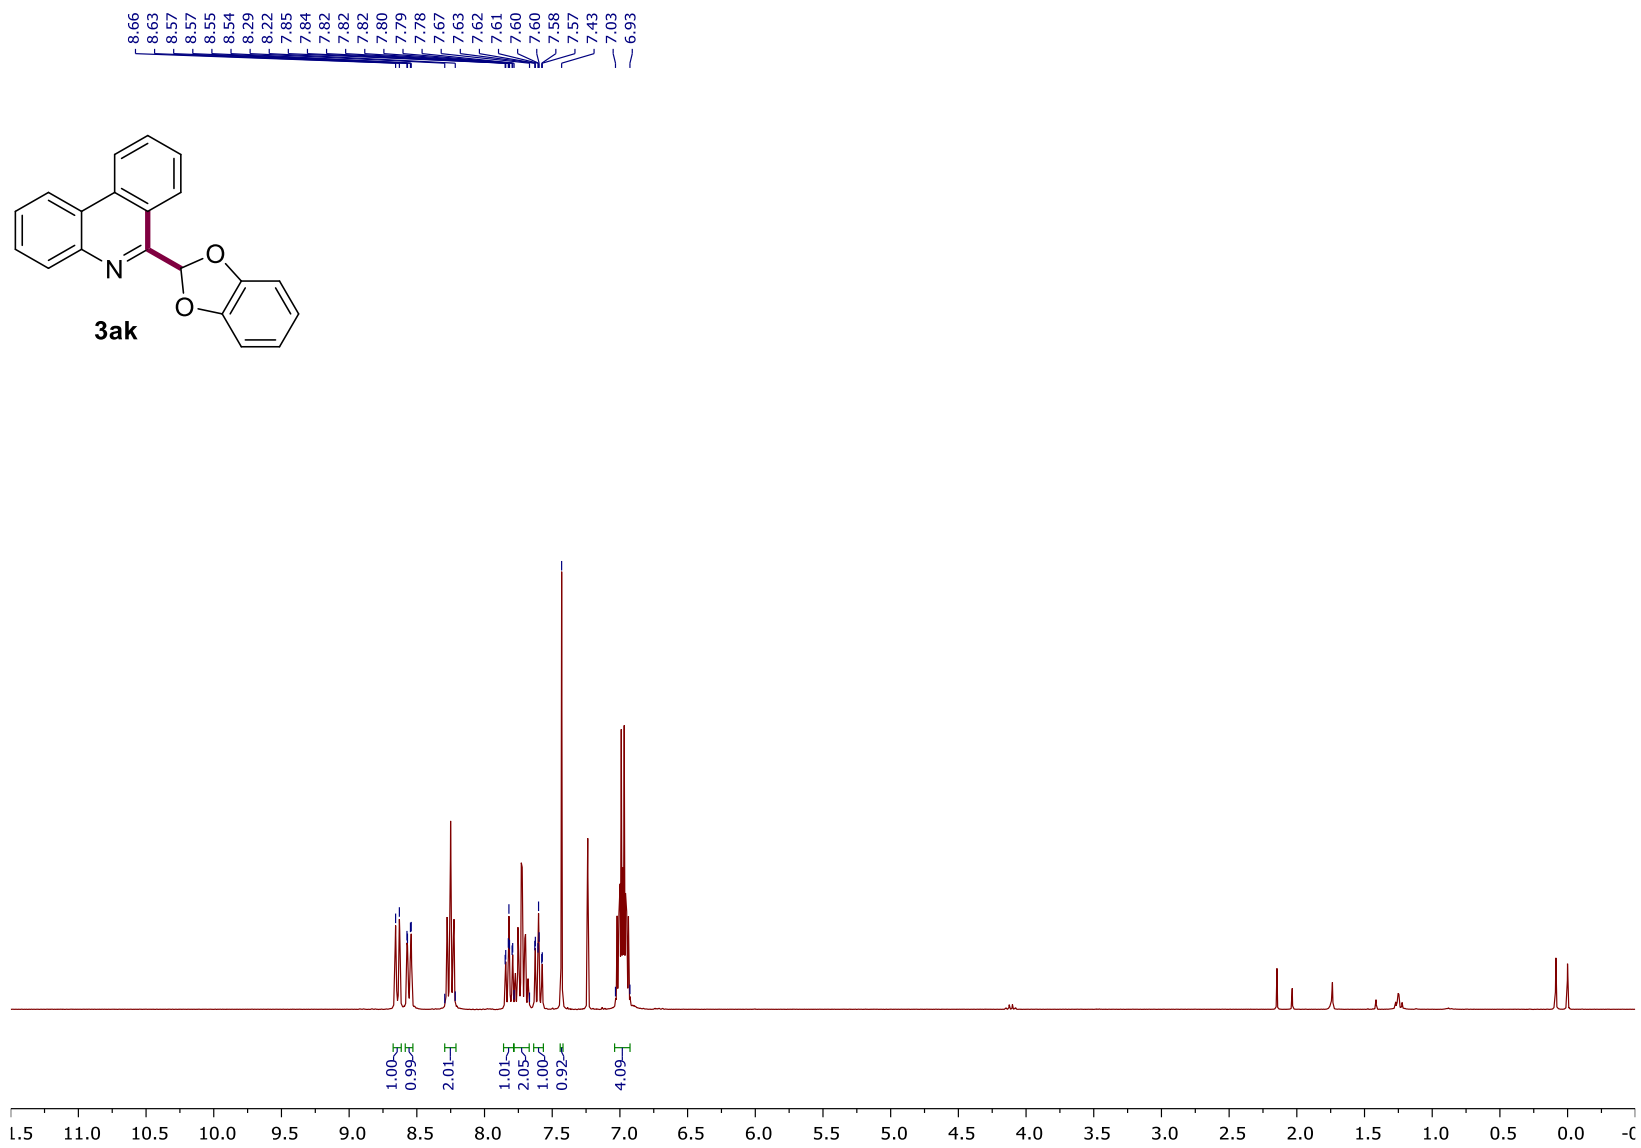

$^{13}\text{C}$ -NMR (75 MHz,  $\text{CDCl}_3$ )

152.47  
147.49  
142.91  
133.88  
130.93  
128.99  
128.37  
127.71  
125.94  
124.96  
123.81  
122.63  
122.34  
122.15  
112.18  
109.42

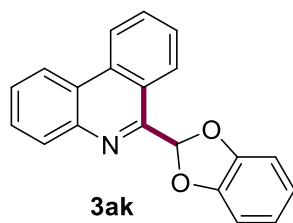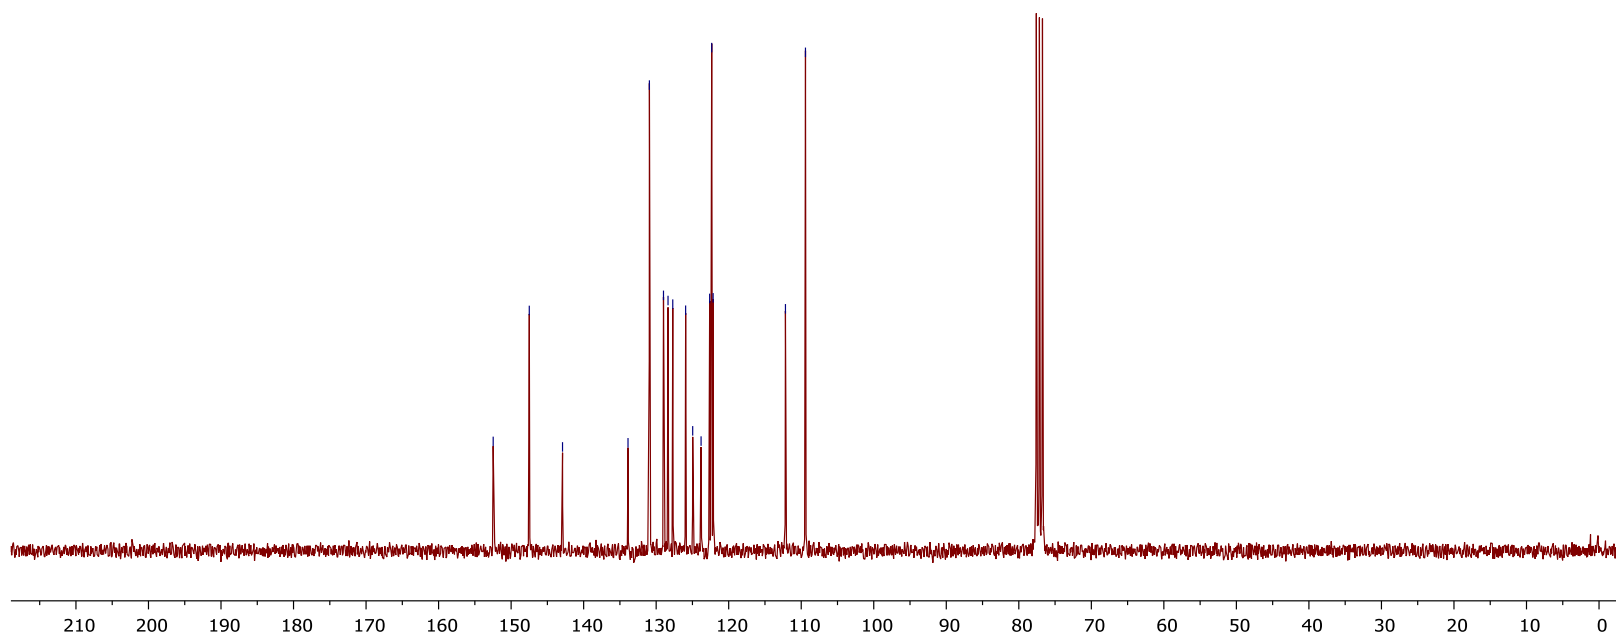

<sup>1</sup>H-NMR (300 MHz, CDCl<sub>3</sub>)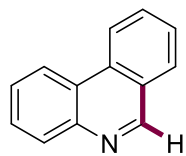

**4a**

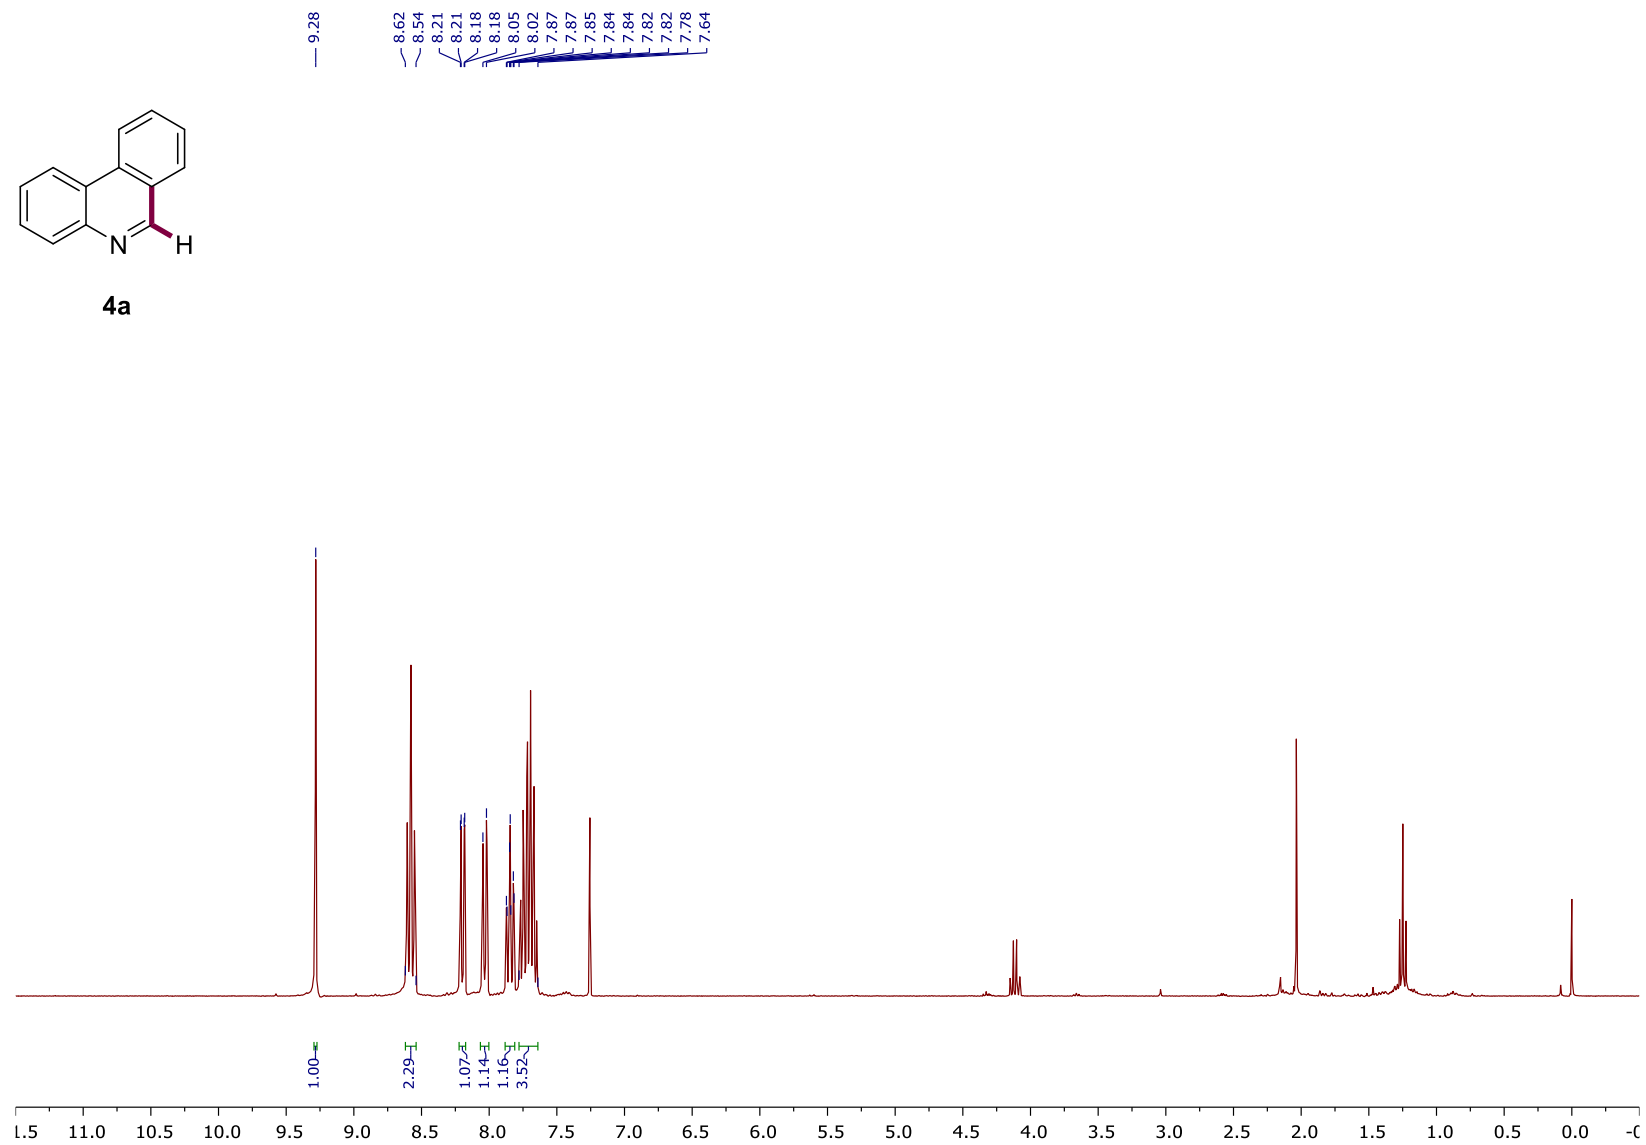

$^{13}\text{C}$ -NMR (75 MHz,  $\text{CDCl}_3$ )

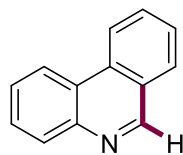

**4a**

153.68  
144.61  
132.67  
131.10  
130.28  
128.87  
128.79  
127.59  
127.19  
126.51  
124.22  
122.33  
121.98

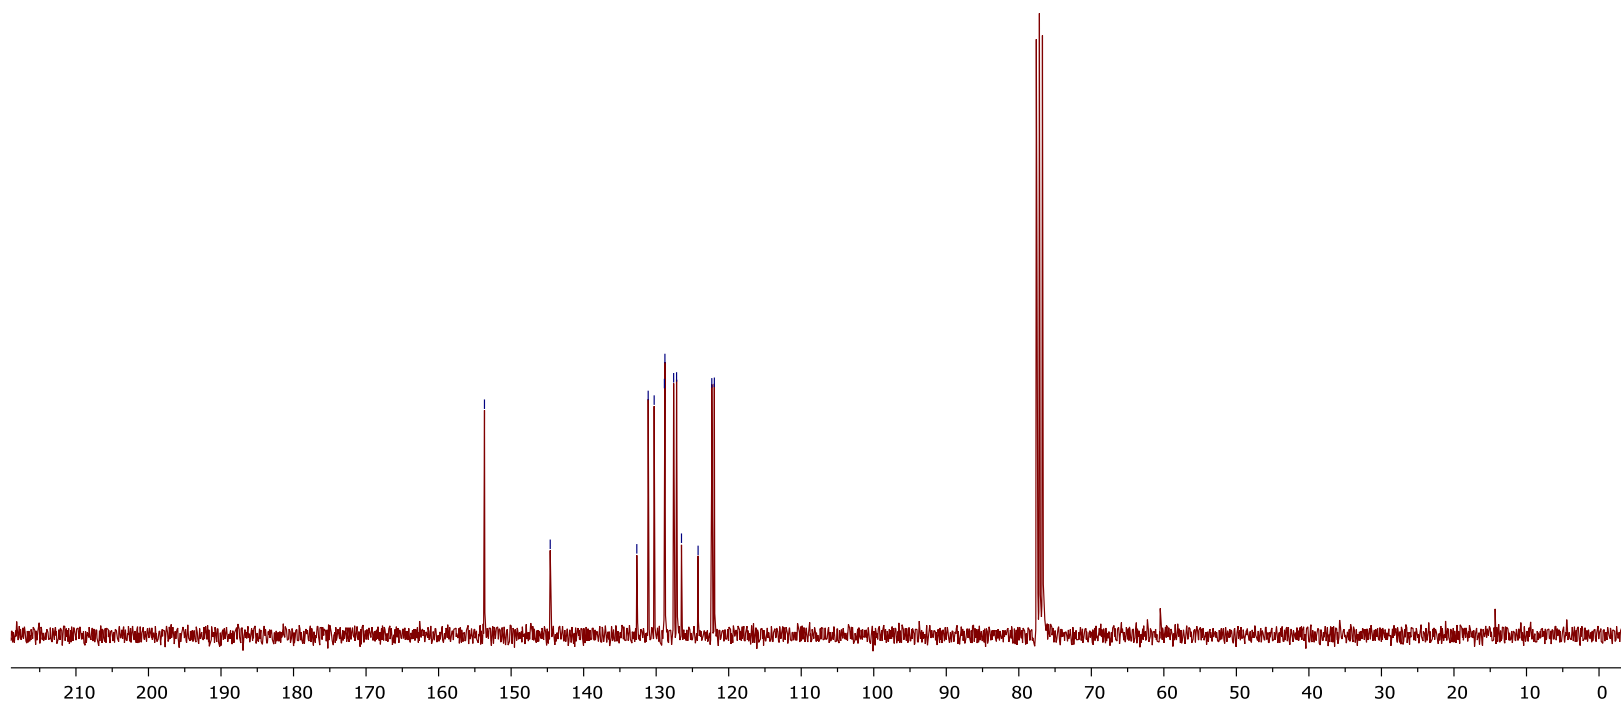

Supplement: c6ob02103d1.pdf [file c6ob02103d1.pdf]
